# Supplementary material for: How frames and narratives in press releases shape newspaper science articles: the case of ocean plastic pollution
Source: Copernicus journal article supplement (doi:10.5194/gc-8-297-2025), 2025-10-15
Supplement: Supplementary file 1 [file Results_Dataset_Qualitative_20250509.xlsx]

## Sheet: Dataset
Type		Number	Word count	Copied in multiple newspapers	B : 1. Human Health	C : 2. Economic	D : 3. Biological	E : 4. Non-biological	F : 5. Treatment	G : 6. Conflict	H : 02. Opportunities due to CC or OP	I : 03. Opportunities due to treatment	RESP_C : 1. Politics or governments	L : 2. Companies or industries	M : 3. Regions, countries or cities	N : 4. Human activity - Society	O : 5. Other	RESP_T : 1. Politics or governments	R : 2. Companies	S : 3. Regions, countries or cities	T : 4. Society	U : 5. Other	V : 07. Urgency to take action	W : 08. Treatment recommendation	Y : FOUT	Z : Local specific information	AE : Topic refers to CC	AA : New Research aangehaald	AC : Reference orgigin text	AD : Reference to research article title	AF : 1. Narrativity	AG : 1.1. Inverted Pyramid Style	AH : 1.2. Personalization	AI : 1.5. Stylistic element	AJ : 2. Tone	AK : 2.1. Alarmist - Fatalistic	AL : 2.2. Negative	AM : 2.3. Unexited - Neutral	AN : 2.4. Positive - Hopefull	AO : 2.5. Passionate - Excited	AP : 3. Actors	AQ : 1. Victim	AR : 2. Villain	AS : 3. Hero	AT : 4. Warner	AU : 4. Actors present in story	AV : Actor statements	AW : 4.1 Internal Scientist	AX : Nieuwe quotes zijn toegevoegd aan het persbericht
NA	1	1.1	203				Plastic waste is destroying coral reefs by spreading diseases, a study has found.																									Plastic waste is destroying coral reefs by spreading diseases, a study has found.	The authors of the study by Cornell University in the US surveyed 159 coral reefs in Indonesia, Australia, Burma and Thailand. She said that diseased corals suffered irreversible tissue loss: "It's like getting gangrene on your foot and there is nothing you can do to stop it from affecting your whole body."	Joleah Lamb, lead author of the study published in the journal Science, said: "Plastic debris acts like a marine motorhome for microbes. Items such as toothbrushes have been shown to be heavily inhabited by bacteria." She said that diseased corals suffered irreversible tissue loss: "It's like getting gangrene on your foot and there is nothing you can do to stop it from affecting your whole body."		Plastic waste is destroying coral reefs by spreading diseases, a study has found.												Joleah Lamb, lead author of the study published in the journal Science, said: "Plastic debris acts like a marine motorhome for microbes. Items such as toothbrushes have been shown to be heavily inhabited by bacteria." She said that diseased corals suffered irreversible tissue loss: "It's like getting gangrene on your foot and there is nothing you can do to stop it from affecting your whole body."
NA	1	1.11	455				Plastics waste is triggering disease outbreaks in coral reefs in the Asia-Pacific region, according to a new study.																	"Our study indicates decreasing levels of plastic debris entering the ocean by improving waste management infrastructure is critical for reducing the amount of debris on coral reefs and the associated risk of disease and structural damage," the authors said.								Plastics waste is triggering disease outbreaks in coral reefs in the Asia-Pacific region, according to a new study.	Lead author Joleah Lamb said the study examined more than 120,000 corals, both plastics-free and with plastics present, on 159 reefs in waters off Indonesia, Australia, Myanmar and Thailand.				"Our study indicates decreasing levels of plastic debris entering the ocean by improving waste management infrastructure is critical for reducing the amount of debris on coral reefs and the associated risk of disease and structural damage," the authors said.											"We found the chance of disease increased from 4 percent to 89 percent when corals are in contact with plastic. We don't know the exact mechanisms, but plastics make ideal vessels for colonizing microscopic organisms that could trigger disease if they come into contact with corals," Lamb said. "We estimate there are 11.1 billion plastic items on coral reefs across the Asia-Pacific [region] and fo…	"We found the chance of disease increased from 4 percent to 89 percent when corals are in contact with plastic. We don't know the exact mechanisms, but plastics make ideal vessels for colonizing microscopic organisms that could trigger disease if they come into contact with corals," Lamb said. "For example, plastic items such as those commonly made of polypropylene, such as bottle caps and toothb…
NA	1	1.15	576				Dr. Joleah Lamb decided to investigate this matter further. She noticed that when she lifted plastic from the water, corals would have disease because of plastic contamination.	"rising temperatures, acidifying waters, overfishing, nutrient pollution, etc." However, people never equate plastic as the source of problems in the aquatic ecosystem.				If they change their habits, then we can protect the aquatic ecosystem, resulting in less damage to the coral reefs and the animals that depend on the Earth's waters.				Yet, even though people are aware of this concept, many people are throwing waste in the Earth's waters.					A person may think that one plastic bag will not damage the Earth, but in reality, one plastic bag can cause great harm. We want to ensure that the environment where we live is as clean as possible, because no person wants to see the environment decay in the future. How can we encourage people in the Asia-Pacific to change their habits? The first procedure that people can implement is to use less…			If we want to preserve our aquatic ecosystem, then it is imperative that the public is educated on the impact of contamination. How can we encourage people in the Asia-Pacific to change their habits? The first procedure that people can implement is to use less plastic. If this is done properly, then the spread of decay in the water is reduced. In addition, citizens should avoid littering wherever…									Dr. Joleah Lamb decided to investigate this matter further. She noticed that when she lifted plastic from the water, corals would have disease because of plastic contamination.							Plastic is a major source of contamination. Although some form of contamination is typically present, people can do their part by changing their habits for the welfare of the planet. If they change their habits, then we can protect the aquatic ecosystem, resulting in less damage to the coral reefs and the animals that depend on the Earth's waters.			Yet, even though people are aware of this concept, many people are throwing waste in the Earth's waters. In turn, this damages the aquatic ecosystem, especially coral reefs.						In fact, when people think about damage to the aquatic ecosystem, the sources that come to mind include "rising temperatures, acidifying waters, overfishing, nutrient pollution, etc." However, people never equate plastic as the source of problems in the aquatic ecosystem.
NA	1	1.16	325				An international scientific research found that the contact of corals with plastic waste increases the chances that these organisms contract diseases , academic sources reported Thursday.	Professor Emeritus of the JCU, Bette Willis, warned that the laundering is expected to increase with the warming of sea water, and that 275 million people depend on these ecosystems as a source of food or income from tourism, among others.																	"We do not know the exact mechanism but plastics are ideal conductors for the colonization of microscopic organisms that could spread diseases if they come into contact with corals," he added.							An international scientific research found that the contact of corals with plastic waste increases the chances that these organisms contract diseases , academic sources reported Thursday.	The scientists analyzed more than 120,000 corals from 159 reefs in Indonesia, Australia, Myanmmar (Burma) and Thailand, some of which were affected by the presence of plastics and others free of this contamination.				The study, published this week in the scientific journal Science, predicts that this problem will worsen Professor Emeritus of the JCU, Bette Willis, warned that the laundering is expected to increase with the warming of sea water, and that 275 million people depend on these ecosystems as a source of food or income from tourism, among others.					Professor Emeritus of the JCU, Bette Willis, warned that the laundering is expected to increase with the warming of sea water, and that 275 million people depend on these ecosystems as a source of food or income from tourism, among others.			The study, published this week in the scientific journal Science, predicts that this problem will worsen. "We estimate that there are 11,100 million remains of plastics on coral reefs throughout Asia Pacific and are projected to increase by 40 percent in seven years." This amounts to 15,700 million plastic debris in all coral reefs of Asia Pacific by 2025 "added Lamb. Professor Emeritus of the JC…				"We note that the chances of contracting diseases increase from 4 to 89 percent when corals are in contact with plastics," said Lamb. "We do not know the exact mechanism but plastics are ideal conductors for the colonization of microscopic organisms that could spread diseases if they come into contact with corals," he added. Professor Emeritus of the JCU, Bette Willis, warned that the laundering …
NA	1	1.21	891				Scientists examined 125,000 corals across the Asia-Pacific region, home to half the world's reefs, and found 89% of those fouled by plastic were suffering disease. On plastic-free reefs, only 4% of the corals were diseased.	Unfortunately, there's nowhere to hide from global warming, and even the most pristine reefs are vulnerable to bleaching," he said. Prof Alasdair Edwards, at Newcastle University, UK, and also not involved in the new study, said the combined impact of plastic-related disease and climate change could be very serious: "Warming oceans are still the major threat to corals, but this paper shows that i…							They found plastic snared on a third of the individual specimens, with the problem much worse on Indonesian reefs than on the Great Barrier Reef in Australia, where plastic waste is better managed.	Prof Alasdair Edwards, at Newcastle University, UK, and also not involved in the new study, said the combined impact of plastic-related disease and climate change could be very serious: "Warming oceans are still the major threat to corals, but this paper shows that in areas more affected by humans, as exemplified by plastic debris, the chance of corals recovering from mass-bleaching and mortality…					Lamb said the one hopeful aspect of the plastic pollution problem was that people can take direct action: "The take-home message for individuals is to be more considered about the amount of single-use plastics you are using and think about where your plastic goes. These little things do matter."		The scientists said it is "critical" to cut plastic pollution. Prof Alasdair Edwards, at Newcastle University, UK, and also not involved in the new study, said the combined impact of plastic-related disease and climate change could be very serious: "Warming oceans are still the major threat to corals, but this paper shows that in areas more affected by humans, as exemplified by plastic debris, th…	The scientists said it is "critical" to cut plastic pollution. Lamb said the one hopeful aspect of the plastic pollution problem was that people can take direct action: "The take-home message for individuals is to be more considered about the amount of single-use plastics you are using and think about where your plastic goes. These little things do matter."			Billions of pieces of plastic pollution are snagged on coral reefs, sending disease rates soaring, new research has revealed. The discovery compounds the damage being done to a vital habitat that already faces an existential threat from the warming caused by climate change. Unfortunately, there's nowhere to hide from global warming, and even the most pristine reefs are vulnerable to bleaching," h…	Earlier in January, a team led by Hughes published work warning that repeated bleaching events are now "the new normal" due to global warming and pose a fatal threat to reefs. "The new study shows that remote reefs have much less plastic and disease. Unfortunately, there's nowhere to hide from global warming, and even the most pristine reefs are vulnerable to bleaching," he said.				Billions of pieces of plastic pollution are snagged on coral reefs, sending disease rates soaring, new research has revealed. The discovery compounds the damage being done to a vital habitat that already faces an existential threat from the warming caused by climate change.	Scientists examined 125,000 corals across the Asia-Pacific region, home to half the world's reefs, and found 89% of those fouled by plastic were suffering disease. On plastic-free reefs, only 4% of the corals were diseased.	"It's like getting gangrene on your toe and watching it eat your body. There's not much you can do to stop it. If a piece of plastic happens to entangle on a coral it has a pretty bad chance of survival."						Billions of pieces of plastic pollution are snagged on coral reefs, sending disease rates soaring, new research has revealed. The discovery compounds the damage being done to a vital habitat that already faces an existential threat from the warming caused by climate change. Lamb said the one hopeful aspect of the plastic pollution problem was that people can take direct action: "The take-home mes…		Coral reefs are not only a wonder of the natural world, home to myriad spectacular creatures, but they are also vital for at least 275 million people who rely on them for food, coastal protection from storms and income from tourism. The scientists said it is "critical" to cut plastic pollution.			Coral reefs are not only a wonder of the natural world, home to myriad spectacular creatures, but they are also vital for at least 275 million people who rely on them for food, coastal protection from storms and income from tourism. The scientists said it is "critical" to cut plastic pollution. The scientists were only able to record items of plastic more than 5cm in length, so did not assess the…				"Corals are animals just like me and you - they become wounded and then infected," said Joleah Lamb, at Cornell University in the US, who led the new research, published in the journal Science. "Plastics are ideal vessels for microorganisms, with pits and pores, so it's like cutting yourself with a really dirty knife." During dives Lamb found objects from plastic chairs to baby nappies to a Nike-…
NA	1	1.24	285				MIAMI: When coral reefs come in contact with plastic trash in the ocean, their risk of becoming diseased skyrockets, said an international study out Thursday.	Coral reefs are already under stress due to global warming, which boosts diseases and can cause coral to bleach and die.																			Coral reefs are already under stress due to global warming, which boosts diseases and can cause coral to bleach and die.					MIAMI: When coral reefs come in contact with plastic trash in the ocean, their risk of becoming diseased skyrockets, said an international study out Thursday.	Researchers examined more than 120,000 corals on 159 reefs -- some polluted with plastic, others not -- from Indonesia, Australia, Myanmar and Thailand for the study in the journal Science.	MIAMI: When coral reefs come in contact with plastic trash in the ocean, their risk of becoming diseased skyrockets, said an international study out Thursday.		MIAMI: When coral reefs come in contact with plastic trash in the ocean, their risk of becoming diseased skyrockets, said an international study out Thursday. Coral reefs are already under stress due to global warming, which boosts diseases and can cause coral to bleach and die.									The problem of plastic pollution is widespread in the world's oceans, and is rapidly getting worse. "We estimate there are 11.1 billion plastic items on coral reefs across the Asia-Pacific and forecast this to increase by 40 percent within seven years," Lamb said. "That equates to an estimated 15.7 billion plastic items on coral reefs across the Asia-Pacific by 2025."				"We found that the chance of disease increased from four percent to 89 percent when corals are in contact with plastic," said lead author Joleah Lamb, from the ARC Centre of Excellence for Coral Reef Studies at James Cook University in Australia. "For example, plastic items such as those commonly made of polypropylene, like bottle caps and toothbrushes, have been shown to become heavily inhabited…
NA	1	1.25	127				PLASTIC waste dramatically increases the chance of disease in corals, new Queensland research has found.																									PLASTIC waste dramatically increases the chance of disease in corals, new Queensland research has found.	Dr Joleah Lamb said research by James Cook University revealed the likelihood of coral becoming diseased increased from 4 per cent to 89 per cent after contact with plastic debris.			PLASTIC waste dramatically increases the chance of disease in corals, new Queensland research has found.									Dr Lamb said the problem waste is expected to get worse."We estimate there are 11.1 billion plastic items on coral reefs across the Asia-Pacific and forecast this to increase by 40 per cent within seven years," she said.	Dr Joleah Lamb said research by James Cook University revealed the likelihood of coral becoming diseased increased from 4 per cent to 89 per cent after contact with plastic debris.			"Plastic items such as those commonly made of polypropylene, like bottle caps and toothbrushes, have been shown to become heavily inhabited by bacteria that are associated with a globally devastating group of coral diseases known as white syndromes," she said. Dr Lamb said the problem waste is expected to get worse."We estimate there are 11.1 billion plastic items on coral reefs across the Asia-P…
NA	1	1.29	426	2	There’s more than 275 million people relying upon coral reefs for food, coastal protection, tourism income and cultural significance. So moderating disease outbreak risks in the ocean will be vital for improving both human and ecosystem health,” Willis added.	There’s more than 275 million people relying upon coral reefs for food, coastal protection, tourism income and cultural significance. So moderating disease outbreak risks in the ocean will be vital for improving both human and ecosystem health,” Willis added.	New York: Scientists have found that contact with plastic waste ubiquitous throughout the world’s oceans massively increases the chance of disease in corals.	“Bleaching events are projected to increase in frequency and severity as ocean temperatures rise.				There’s more than 275 million people relying upon coral reefs for food, coastal protection, tourism income and cultural significance. So moderating disease outbreak risks in the ocean will be vital for improving both human and ecosystem health,” Willis added.											There’s more than 275 million people relying upon coral reefs for food, coastal protection, tourism income and cultural significance. So moderating disease outbreak risks in the ocean will be vital for improving both human and ecosystem health,” Willis added.	“This study demonstrates that reductions in the amount of plastic waste entering the ocean will have direct benefits to coral reefs by reducing disease-associated mortality,” Lamb said.			The findings, published in the journal Science, add to the burden of climate-related disease outbreaks that have already had an impact on coral reefs globally, James Cook University Emeritus Professor Bette Willis said.					New York: Scientists have found that contact with plastic waste ubiquitous throughout the world’s oceans massively increases the chance of disease in corals.	New York: Scientists have found that contact with plastic waste ubiquitous throughout the world’s oceans massively increases the chance of disease in corals.	Coral are tiny animals with living tissue that cling to and build upon one another to form “apartments,” or reefs. Bacterial pathogens ride aboard the plastics, disturbing delicate coral tissues and their microbiome. “It’s like getting gangrene on your foot and there is nothing you can do to stop it from affecting your whole body,” she said.						New York: Scientists have found that contact with plastic waste ubiquitous throughout the world’s oceans massively increases the chance of disease in corals. “For example, plastic items such as those commonly made of polypropylene, like bottle caps and toothbrushes, have been shown to become heavily inhabited by bacteria that are associated with a globally devastating group of coral diseases know…					“Bleaching events are projected to increase in frequency and severity as ocean temperatures rise. There’s more than 275 million people relying upon coral reefs for food, coastal protection, tourism income and cultural significance. So moderating disease outbreak risks in the ocean will be vital for improving both human and ecosystem health,” Willis added.				“We examined more than 120,000 corals, both plastic-free and with plastic present, on 159 reefs from Indonesia, Australia, Myanmar and Thailand,” said lead researcher Joleah Lamb, a postdoctoral research fellow at Cornell University in New York. “We found that the chance of disease increased from four per cent to 89 per cent when corals are in contact with plastic,” Lamb said.
NA	1	1.33	352				Scientists have found that plastic trash ubiquitous throughout the world's oceans massively increases the chance of disease in corals.	"Bleaching events are projected to increase in frequency and severity as ocean temperatures rise.				"Bleaching events are projected to increase in frequency and severity as ocean temperatures rise. Theres more than 275 million people relying upon coral reefs for food, coastal protection, tourism income, and cultural significance," said Professor Bette Willis, from the James Cook University in Australia. "So moderating disease outbreak risks in the ocean will be vital for improving both human an…											"Bleaching events are projected to increase in frequency and severity as ocean temperatures rise. Theres more than 275 million people relying upon coral reefs for food, coastal protection, tourism income, and cultural significance," said Professor Bette Willis, from the James Cook University in Australia. "So moderating disease outbreak risks in the ocean will be vital for improving both human an…	"This study demonstrates that reductions in the amount of plastic waste entering the ocean will have direct benefits to coral reefs by reducing disease-associated mortality," Lamb said.			The researchers said the finding adds to the burden of climate-related disease outbreaks that have already had an impact on coral reefs globally.					Scientists have found that plastic trash ubiquitous throughout the world's oceans massively increases the chance of disease in corals.	Scientists have found that plastic trash ubiquitous throughout the world's oceans massively increases the chance of disease in corals.	Coral are tiny animals with living tissue that cling to and build upon one another to form "apartments," or reefs, according to a study published in the journal Science. "It's like getting gangrene on your foot and there is nothing you can do to stop it from affecting your whole body," the researcher said.						Scientists have found that plastic trash ubiquitous throughout the world's oceans massively increases the chance of disease in corals. "This study demonstrates that reductions in the amount of plastic waste entering the ocean will have direct benefits to coral reefs by reducing disease-associated mortality," Lamb said.					She said the problem of plastic waste looks to be getting worse. The scientists forecast that by 2025, plastic going into the marine environment will increase to roughly 15.7 billion plastic items on coral reefs, which could lead to skeletal eroding band disease, white syndromes and black band disease.	"We examined more than 120,000 corals, both plastic-free and with plastic present, on 159 reefs from Indonesia, Australia, Myanmar and Thailand," said Joleah Lamb, from the Cornell University in the US.		"We examined more than 120,000 corals, both plastic-free and with plastic present, on 159 reefs from Indonesia, Australia, Myanmar and Thailand," said Joleah Lamb, from the Cornell University in the US.	"We examined more than 120,000 corals, both plastic-free and with plastic present, on 159 reefs from Indonesia, Australia, Myanmar and Thailand," said Joleah Lamb, from the Cornell University in the US. "We estimate there are 11.1 billion plastic items on coral reefs across the Asia-Pacific and forecast this to increase by 40 per cent within seven years," she said. "Bleaching events are projected…
NA	1	1.5	258				"We found that the odds of disease increased from 4% to 89%. % when corals are in contact with plastic, "said study author Joleah Lamb of the ARC Center of Excellence for Coral Reef Studies at James Cook University in Australia.	Coral reefs are already under pressure from global warming, which underpins diseases and causes these organisms to discolor and die.																			Coral reefs are already under pressure from global warming, which underpins diseases and causes these organisms to discolor and die.					Researchers examined more than 120,000 corals on 159 reefs, some contaminated with plastic and others not, in Indonesia, Australia, Burma and Thailand for a study in the journal Science.>	Researchers examined more than 120,000 corals on 159 reefs, some contaminated with plastic and others not, in Indonesia, Australia, Burma and Thailand for a study in the journal Science.>				"This amounts to an estimated 15.7 billion plastic objects in coral reefs "in that region by 2025.>> Coral reefs are already under pressure from global warming, which underpins diseases and causes these organisms to discolor and die.												"We found that the odds of disease increased from 4% to 89%. % when corals are in contact with plastic, "said study author Joleah Lamb of the ARC Center of Excellence for Coral Reef Studies at James Cook University in Australia. Lamb said scientists are still trying to find out why Plastics are so dangerous to coral that they are a cluster of living organisms that cover about 0.2% of the sea floo…
NA	1	1.8	394	1	Chemicals from plastic also leach into the water, and it has been shown that even humans who eat seafood ingest 11,000 pieces of microplastic each year.		PLASTICS in the oceans are killing corals by increasing their risk of becoming diseased, scientists have shown for the first time.	Researchers have calculated that there are now more than 11billion items of plastic lodged in corals across the globe, raising the risk of deadly infections by up to 89 per cent. Corals are already under attack from ocean acidification and warming seas, which is causing mass bleaching.				Prof Bette Willis said: "Bleaching events are projected to increase in frequency and severity as ocean temperatures rise. There's more than 275 million people relying upon coral reefs for food, coastal protection, tourism income, and cultural significance. So moderating disease outbreak risks in the ocean will be vital for improving both human and ecosystem health."											Prof Bette Willis said: "Bleaching events are projected to increase in frequency and severity as ocean temperatures rise. There's more than 275 million people relying upon coral reefs for food, coastal protection, tourism income, and cultural significance. So moderating disease outbreak risks in the ocean will be vital for improving both human and ecosystem health."				Researchers have calculated that there are now more than 11billion items of plastic lodged in corals across the globe, raising the risk of deadly infections by up to 89 per cent. Corals are already under attack from ocean acidification and warming seas, which is causing mass bleaching.	A recent study, meanwhile, estimated that nine in 10 of the world's seabirds have plastic in their guts. Chemicals from plastic also leach into the water, and it has been shown that even humans who eat seafood ingest 11,000 pieces of microplastic each year.				PLASTICS in the oceans are killing corals by increasing their risk of becoming diseased, scientists have shown for the first time.	PLASTICS in the oceans are killing corals by increasing their risk of becoming diseased, scientists have shown for the first time.				Each year 10 per cent of the more than 300million tons of plastic produced globally will end up in the sea. A recent study, meanwhile, estimated that nine in 10 of the world's seabirds have plastic in their guts. Chemicals from plastic also leach into the water, and it has been shown that even humans who eat seafood ingest 11,000 pieces of microplastic each year.								Researchers fear the problem is getting worse. They estimate that plastic on reefs will increase by 40 per cent in the next seven years, with 15.7 billion items choking corals by 2025.	Researchers fear the problem is getting worse. They estimate that plastic on reefs will increase by 40 per cent in the next seven years, with 15.7 billion items choking corals by 2025. There's more than 275 million people relying upon coral reefs for food, coastal protection, tourism income, and cultural significance. So moderating disease outbreak risks in the ocean will be vital for improving b…			Dr Joleah Lamb, from the ARC Centre of Excellence for Coral Reef Studies based at James Cook University, said: "We don't know the exact mechanisms, but plastics make ideal vessels for colonising microscopic organisms that could trigger disease if they come into contact with corals. For example, plastic items such as those commonly made of polypropylene, like bottle caps and toothbrushes, have bee…
NA	1	1.14	488	1			OSLO: Billions of bits of plastic waste are entangled in corals and sickening reefs from Thailand to Australia's Great Barrier Reef, scientists said on Thursday.	The trash is another pressure on corals, already suffering from over-fishing, rising temperatures caused by climate change and other pollution.						The trash is another pressure on corals, already suffering from over-fishing, rising temperatures caused by climate change and other pollution. In the Asia-Pacific region a total of 11.1 billion plastic items - including shopping bags, fishing nets, even diapers and tea-bags - are ensnared on reefs, the scientists wrote in the journal Science. "Overfishing today is the biggest threat." He said na…				The scientists urged tougher restrictions on plastic waste. "Overfishing today is the biggest threat." He said nations from Belize to the Philippines were acting to regulate fisheries on corals.		"Overfishing today is the biggest threat." He said nations from Belize to the Philippines were acting to regulate fisheries on corals.			The presence of plastics seemed especially to aggravate some common coral afflictions, such as skeletal eroding band disease. The scientists urged tougher restrictions on plastic waste.	The scientists urged tougher restrictions on plastic waste. Co-author Douglas Rader of the US Environmental Defense Fund said better management of fisheries was the best way to strengthen coral reefs to enable them to fend off man-made threats such as more plastics. "This is not a story about 'let's give up on corals'," he said.			The trash is another pressure on corals, already suffering from over-fishing, rising temperatures caused by climate change and other pollution.			The full study is available online at Sciencemag.org.		OSLO: Billions of bits of plastic waste are entangled in corals and sickening reefs from Thailand to Australia's Great Barrier Reef, scientists said on Thursday.	OSLO: Billions of bits of plastic waste are entangled in corals and sickening reefs from Thailand to Australia's Great Barrier Reef, scientists said on Thursday.							In December, almost 200 nations agreed to limit plastic pollution of the oceans, warning that it could outweigh all fish by 2030. Co-author Douglas Rader of the US Environmental Defense Fund said better management of fisheries was the best way to strengthen coral reefs to enable them to fend off man-made threats such as more plastics. "This is not a story about 'let's give up on corals'," he said.		At least 275 million people worldwide live near reefs, which provide food, coastal protection and income from tourism.		"Overfishing today is the biggest threat." He said nations from Belize to the Philippines were acting to regulate fisheries on corals.	In December, almost 200 nations agreed to limit plastic pollution of the oceans, warning that it could outweigh all fish by 2030	In December, almost 200 nations agreed to limit plastic pollution of the oceans, warning that it could outweigh all fish by 2030. Co-author Douglas Rader of the US Environmental Defense Fund said better management of fisheries was the best way to strengthen coral reefs to enable them to fend off man-made threats such as more plastics. "This is not a story about 'let's give up on corals'," he said.			"You could be diving and you think someone's tapping your shoulder but it's just a bottle knocking against you, or a plastic trash bag stuck on your tank," said lead author Joleah Lamb of Cornell University. Corals are animals like us and have really thin tissues that can be cut and wounded, especially if they are cut by an item covered in all sorts of micro-organisms," she said. The link between…
PR	1	1.A 'marine motorhome for microbes'.Oceanic pl	568				The scientists forecast that by 2025, plastic going into the marine environment will increase to roughly 1 5.7 billion plastic items on coral reefs, which could lead to skeletal eroding band disease, white syndromes and black band disease.	"Our work shows that plastic pollution is killing corals. Our goal is to focus less on measuring things dying and more on ~nding solutions," said senior author Drew Harvell, professor of ecology and evolutionary biology. "While we can't stop the huge impact of global warming on coral health in the short term, this new work should drive policy toward reducing plastic pollution."				Said Lamb: "This study demonstrates that reductions in the amount of plastic waste entering the ocean will have direct bene~ts to coral reefs by reducing disease-associated mortality."						"Our work shows that plastic pollution is killing corals. Our goal is to focus less on measuring things dying and more on ~nding solutions," said senior author Drew Harvell, professor of ecology and evolutionary biology. "While we can't stop the huge impact of global warming on coral health in the short term, this new work should drive policy toward reducing plastic pollution."					"Our work shows that plastic pollution is killing corals. Our goal is to focus less on measuring things dying and more on ~nding solutions," said senior author Drew Harvell, professor of ecology and evolutionary biology. "While we can't stop the huge impact of global warming on coral health in the short term, this new work should drive policy toward reducing plastic pollution."	"Our work shows that plastic pollution is killing corals. Our goal is to focus less on measuring things dying and more on ~nding solutions," said senior author Drew Harvell, professor of ecology and evolutionary biology. "While we can't stop the huge impact of global warming on coral health in the short term, this new work should drive policy toward reducing plastic pollution."			ITHACA, N.Y. - For coral reefs, the threat of climate change and bleaching are bad enough.					ITHACA, N.Y. - For coral reefs, the threat of climate change and bleaching are bad enough. An international research group led by Cornell University has found that plastic trash - ubiquitous throughout the world's oceans - intensi~es disease for coral, adding to reef peril, according to a new study in the journal Science.	"Plastic debris acts like a marine motorhome for microbes," said the study's lead author, Joleah Lamb, a postdoctoral research fellow at Cornell. She began collecting this data as a doctoral candidate at James Cook University in Australia.	Coral are tiny animals with living tissue that cling to and build upon one another to form "apartments," or reefs. Bacterial pathogens ride aboard the plastics, disturbing delicate coral tissues and their microbiome. "What's troubling about coral disease is that once the coral tissue loss occurs, it's not coming back," said Lamb. "I t's like getting gangrene on your foot and there is nothing you …						"Our work shows that plastic pollution is killing corals. Our goal is to focus less on measuring things dying and more on ~nding solutions," said senior author Drew Harvell, professor of ecology and evolutionary biology. "While we can't stop the huge impact of global warming on coral health in the short term, this new work should drive policy toward reducing plastic pollution." Said Lamb: "This s…				"Our work shows that plastic pollution is killing corals. Our goal is to focus less on measuring things dying and more on ~nding solutions," said senior author Drew Harvell, professor of ecology and evolutionary biology. "While we can't stop the huge impact of global warming on coral health in the short term, this new work should drive policy toward reducing plastic pollution."		"Our work shows that plastic pollution is killing corals. Our goal is to focus less on measuring things dying and more on ~nding solutions," said senior author Drew Harvell, professor of ecology and evolutionary biology.		"Plastic debris acts like a marine motorhome for microbes," said the study's lead author, Joleah Lamb, a postdoctoral research fellow at Cornell. She began collecting this data as a doctoral candidate at James Cook University in Australia. "Plastics make ideal vessels for colonizing microscopic organisms that could trigger disease if they come into contact with corals," Lamb said. "Plastic items …
NA	1	1.38	564	2			The study said the chance of coral disease increased 20-fold once it became entangled in plastic, due to light deprivation, toxin release, and a lack of oxygen, which gave pathogens a chance to invade.					"With more than 275 million people relying on coral reefs for food, coastal protection, tourism income, and cultural importance moderating disease outbreak risks in the ocean will be vital for improving both human and ecosystem health," said the researchers, led by Dr Lamb.			Researchers surveyed 159 coral reefs and found the most plastic in Indonesia, and the least off Australia, which has tighter waste regulations.			"We also believe it's vital the NSW Government enacts a full ban to avoid facing an alarming future." A spokesman for Woolworths said it was on track to phase out bags at the checkout by July 1, as it announced last year.	Harris Farm Markets has stopped offering single-use plastic bags at the checkouts, the first major retailer to do so, and is encouraging customers to bring their own bag or take a recycled box from the store. "We see it as our collective responsibility to decrease our environmental footprint given there is still so much that needs to be done to protect our precious environment and marine wildlife…		Individuals need to look at their own use of plastic, like bags, bottles and coffee cups, Mr Silverwood said. "They feel so insignificant sometimes ... but it's a declaration of intent that you don't want to be a contributor."		"With more than 275 million people relying on coral reefs for food, coastal protection, tourism income, and cultural importance moderating disease outbreak risks in the ocean will be vital for improving both human and ecosystem health," said the researchers, led by Dr Lamb.	In Australia, there is some good news about the move to abate plastic waste. The Keep Australia Beautiful Litter Index, which is the nation's only long-term survey of litter, found that plastic bag litter was significantly lower in states where they are banned.		In Australia, there is some good news about the move to abate plastic waste. The Keep Australia Beautiful Litter Index, which is the nation's only long-term survey of litter, found that plastic bag litter was significantly lower in states where they are banned. Plastic bags are banned in Tasmania, the ACT, South Australia and the Northern Territory. Queensland, Victoria and Western Australia have…						A marine ecologist describes what it's like to find plastic among remote coral reefs in the Asia-Pacific.	A marine ecologist describes what it's like to find plastic among remote coral reefs in the Asia-Pacific.	"You could be diving and you think someone's tapping your shoulder but it's just a bottle knocking against you, or a plastic trash bag stuck on your tank," Joleah Lamb of New York's Cornell University told Reuters.						Environmentalist Tim Silverwood, the founder of Take 3 for the Sea initiative, which encourages people to take three pieces of rubbish from the beach every visit and bin it, emphasised the need to move away from plastics. "It's brilliant there are retailers out there willing to make these changes. Change is hard, but how much more evidence do we need that change is essential?," he said. Individua…		"With more than 275 million people relying on coral reefs for food, coastal protection, tourism income, and cultural importance moderating disease outbreak risks in the ocean will be vital for improving both human and ecosystem health," said the researchers, led by Dr Lamb.		Harris Farm Markets has stopped offering single-use plastic bags at the checkouts, the first major retailer to do so, and is encouraging customers to bring their own bag or take a recycled box from the store. They have also removed plastic packaging from their organic range, and ask customers to bring their own bag or use a muslin bag while shopping in the fruit and vegetable section	"With more than 275 million people relying on coral reefs for food, coastal protection, tourism income, and cultural importance moderating disease outbreak risks in the ocean will be vital for improving both human and ecosystem health," said the researchers, led by Dr Lamb.	Harris Farm Markets has stopped offering single-use plastic bags at the checkouts, the first major retailer to do so, and is encouraging customers to bring their own bag or take a recycled box from the store. Coles has also vowed to phase out plastic bags this year, while Aldi has always charged customers for its bags.		"You could be diving and you think someone's tapping your shoulder but it's just a bottle knocking against you, or a plastic trash bag stuck on your tank," Joleah Lamb of New York's Cornell University told Reuters.	"You could be diving and you think someone's tapping your shoulder but it's just a bottle knocking against you, or a plastic trash bag stuck on your tank," Joleah Lamb of New York's Cornell University told Reuters. "With more than 275 million people relying on coral reefs for food, coastal protection, tourism income, and cultural importance moderating disease outbreak risks in the ocean will be v…
NA	1	1.12	401				BILLION of bits of plastic waste are entangled in corals and sickening reefs from Thailand to Australia's Great Barrier Reef, scientists say.	The trash is another pressure on corals, already suffering from over-fishing, rising temperatures caused by climate change and other pollution.										The report is timely after Prime Minister Malcolm Turnbull announced a $60 million plan to protect the Great Barrier Reef against coral-eating crown-of-thorns starfish and farm run-off. Separately, the Queensland government has earmarked $256 million over the next five years to improve reef water quality.					.The scientists urged tougher restrictions on plastic waste.	The presence of plastics seemed especially to aggravate some common coral afflictions, such as skeletal eroding band disease.The scientists urged tougher restrictions on plastic waste.		The report is timely after Prime Minister Malcolm Turnbull announced a $60 million plan to protect the Great Barrier Reef against coral-eating crown-of-thorns starfish and farm run-off.	The trash is another pressure on corals, already suffering from over-fishing, rising temperatures caused by climate change and other pollution.					BILLION of bits of plastic waste are entangled in corals and sickening reefs from Thailand to Australia's Great Barrier Reef, scientists say.	BILLION of bits of plastic waste are entangled in corals and sickening reefs from Thailand to Australia's Great Barrier Reef, scientists say.	Trash may damage the tiny coral animals that build reefs, making them more vulnerable to illness. And bits of plastic may act as rafts for harmful microbes in the oceans. "Corals are animals like us and have really thin tissues that can be cut and wounded, especially if they are cut by an item covered in all sorts of micro- organisms."						At least 275 million people worldwide live near reefs, which provide food, coastal protection and income from tourism. The presence of plastics seemed especially to aggravate some common coral afflictions, such as skeletal eroding band disease.The scientists urged tougher restrictions on plastic waste. In December, almost 200 nations agreed to limit plastic pollution of the oceans, warning that i…				The report is timely after Prime Minister Malcolm Turnbull announced a $60 million plan to protect the Great Barrier Reef against coral-eating crown-of-thorns starfish and farm run-off. Separately, the Queensland government has earmarked $256 million over the next five years to improve reef water quality.	Prof Bette Willis said: "Bleaching events are projected to increase in frequency and severity as ocean temperatures rise. There's more than 275 million people relying upon coral reefs for food, coastal protection, tourism income, and cultural significance. So moderating disease outbreak risks in the ocean will be vital for improving both human and ecosystem health."	BILLION of bits of plastic waste are entangled in corals and sickening reefs from Thailand to Australia's Great Barrier Reef, scientists say. "You could be diving and you think someone's tapping your shoulder but it's just a bottle knocking against you, or a plastic trash bag stuck on your tank," lead author Joleah Lamb of Cornell University said. The report is timely after Prime Minister Malcolm…		"You could be diving and you think someone's tapping your shoulder but it's just a bottle knocking against you, or a plastic trash bag stuck on your tank," lead author Joleah Lamb of Cornell University said. "Corals are animals like us and have really thin tissues that can be cut and wounded, especially if they are cut by an item covered in all sorts of micro- organisms."	Scientists were shocked to find plastic even in remote reefs. "You could be diving and you think someone's tapping your shoulder but it's just a bottle knocking against you, or a plastic trash bag stuck on your tank," lead author Joleah Lamb of Cornell University said. "Corals are animals like us and have really thin tissues that can be cut and wounded, especially if they are cut by an item cover…
NA	1	1.18	609				To make matters worse, corals with plastic on them were 20 times more likely to be diseased than those that were not polluted.	As governments work to try to protect reefs from the threat of climate change and warming waters, she added, addressing plastic pollution must be on the agenda, or those efforts could be less effective.							In their survey of about 12,000 square meters of reef, the researchers noticed that countries that are known to have particularly poor methods of dealing with plastic pollution had the most plastic on corals. Countries that take a great deal of care to keep plastic from entering the ocean -- like Australia -- see notably lower levels of it on reefs, and the problem was worst in those with poor in…			As governments work to try to protect reefs from the threat of climate change and warming waters, she added, addressing plastic pollution must be on the agenda, or those efforts could be less effective.		Countries that take a great deal of care to keep plastic from entering the ocean -- like Australia -- see notably lower levels of it on reefs, and the problem was worst in those with poor infrastructure for managing waste, like Indonesia. Helping those countries manage their pollution, ''can also reduce the amount of plastics we're finding on the reefs there,'' Dr. Lamb said.			As governments work to try to protect reefs from the threat of climate change and warming waters, she added, addressing plastic pollution must be on the agenda, or those efforts could be less effective.	Helping those countries manage their pollution, ''can also reduce the amount of plastics we're finding on the reefs there,'' Dr. Lamb said.			As governments work to try to protect reefs from the threat of climate change and warming waters, she added, addressing plastic pollution must be on the agenda, or those efforts could be less effective.						Joleah Lamb began her career as a coral biologist on the Great Barrier Reef. Every now and then she'd note a scrap of plastic as she swam through. But when she started studying reefs in Asia, she came across a completely different level of detritus.							Still, the study shows that it is possible to control the impact of plastic on reefs. Countries that take a great deal of care to keep plastic from entering the ocean -- like Australia -- see notably lower levels of it on reefs, and the problem was worst in those with poor infrastructure for managing waste, like Indonesia. That gave them the stunning figure of 11.1 billion pieces, which they proj…			In their survey of about 12,000 square meters of reef, the researchers noticed that countries that are known to have particularly poor methods of dealing with plastic pollution had the most plastic on corals.	Still, the study shows that it is possible to control the impact of plastic on reefs. Countries that take a great deal of care to keep plastic from entering the ocean -- like Australia -- see notably lower levels of it on reefs, and the problem was worst in those with poor infrastructure for managing waste, like Indonesia. As governments work to try to protect reefs from the threat of climate cha…					''I don't even know how to record this!'' she remembers thinking. ''It's a chair! Where do I put 'chair'? Or diaper? Or bottle?'' Helping those countries manage their pollution, ''can also reduce the amount of plastics we're finding on the reefs there,'' Dr. Lamb said.
NA	1	1.6	804				Plastic trapped in reefs around the world is having a serious impact on coral health, according to a new study.	"Our goal is to focus less on measuring things dying and more on finding solutions," said Professor Harvell."While we can't stop the huge impact of global warming on coral health in the short term, this new work should drive policy towards reducing plastic pollution."										The UK Government has said it will make tackling plastic waste a top priority in its environmental policy. "Our goal is to focus less on measuring things dying and more on finding solutions," said Professor Harvell."While we can't stop the huge impact of global warming on coral health in the short term, this new work should drive policy towards reducing plastic pollution."		This year has already seen a UK ban on the manufacture of products containing tiny fragments of plastic called microbeads, as well as debate over the future of disposable coffee cups and plastic bottles.			"Our goal is to focus less on measuring things dying and more on finding solutions," said Professor Harvell."While we can't stop the huge impact of global warming on coral health in the short term, this new work should drive policy towards reducing plastic pollution."	This year has already seen a UK ban on the manufacture of products containing tiny fragments of plastic called microbeads, as well as debate over the future of disposable coffee cups and plastic bottles.		The UK Government has said it will make tackling plastic waste a top priority in its environmental policy.	By increasing coral's susceptibility to disease, plastic may contribute to the devastation of the world's reefs, many of which have already been weakened by a string of climate change-induced bleaching events.	Professor Thompson added thatin his own work he has documented over 700 species encountering plastic debris, and evidence of harm coming to them as a result. "Laboratory studies have shown that plastic encounters can cause really subtle, chronic effects and harm, compromising the ability of organisms to grow in the normal way for example," he said. "Any compromise like that is going to make creat…				Plastic trapped in reefs around the world is having a serious impact on coral health, according to a new study.	More than 11 billion pieces of plastic were lodged in the Asia-Pacific oceans corals, researchers from New York's Cornell University who studied them.	"Plastic debris acts like a marine motorhome for microbes," said Dr Joleah Lamb, a marine biologist at Cornell University and lead author of the new study. "What's troubling about coral disease is that once the coral tissue loss occurs, it's not coming back," said Dr Lamb."It's like getting gangrene on your foot and there is nothing you can do to stop it from affecting your whole body."						"Plastic items - commonly made of polypropylene, such as bottle caps and toothbrushes - have been shown to become heavily inhabited by bacteria. This is associated with the globally devastating group of coral diseases known as white syndromes," said Dr Lamb. "Our goal is to focus less on measuring things dying and more on finding solutions," said Professor Harvell."While we can't stop the huge im…				The UK Government has said it will make tackling plastic waste a top priority in its environmental policy. "Our goal is to focus less on measuring things dying and more on finding solutions," said Professor Harvell."While we can't stop the huge impact of global warming on coral health in the short term, this new work should drive policy towards reducing plastic pollution."		The UK Government has said it will make tackling plastic waste a top priority in its environmental policy.
NA	3	3.1																					We found that plastic entering the marine environment is set to double by 2040 and, unless the world acts, more than 1.3 billion tonnes of plastic waste will be dumped on land and in waterbodies. The plastic pollution challenge can be substantially controlled within a generation's time. So, is anyone ready to act?	By identifying the ways in which this litter is produced and distributed, we've also discovered how best to reduce the plastic deluge. Having tracked the sources of plastic items through the supply chain and their fate in the environment, we explored what might help reduce aquatic pollution. We found that the single most effective intervention is to provide a service for the 2 billion people who …			Think about other planetary challenges, such as the climate crisis or ozone layer depletion. Mature areas of research have developed around them, allowing scientists to identify where the gases that cause these problems come from, and how much reaches the atmosphere each year.						During a visit to a bookstore a few weeks ago, we couldn't help but stare at a display unit featuring no fewer than 10 books telling you how to rid plastics from your daily life. We're bombarded by information on the topic of marine litter and plastic pollution, but how much do we really know about the problem?	During a visit to a bookstore a few weeks ago, we couldn't help but stare at a display unit featuring no fewer than 10 books telling you how to rid plastics from your daily life. We're bombarded by information on the topic of marine litter and plastic pollution, but how much do we really know about the problem? Our research, published in Science, involved a Herculean effort to spot, track and mod…						Our research, published in Science, involved a Herculean effort to spot, track and model the current and future flows of plastics into the world's land and waterbodies. We found that plastic entering the marine environment is set to double by 2040 and, unless the world acts, more than 1.3 billion tonnes of plastic waste will be dumped on land and in waterbodies. Establishing a comprehensive basel…				By identifying the ways in which this litter is produced and distributed, we've also discovered how best to reduce the plastic deluge. In the process, we found the unsung heroes on the frontline fighting the pollution crisis who could be the world's best hope of stemming the tide. Our work also cast light on the contributions of 11 million waste pickers in low and middle-income countries. These i…		Our work also cast light on the contributions of 11 million waste pickers in low and middle-income countries. These informal workers collect waste items, including plastics, for recycling, to secure a livelihood for day-to-day survival. The model estimates that they may be responsible for 58 per cent of all plastic waste collected for recycling worldwide - more than the combined formal collection…
NA	3	3.1				Plastic can remain in the oceans for hundreds of years leading to a build-up of pollution harming wildlife, contaminating food chains and damaging fisheries and aquaculture.	Plastic can remain in the oceans for hundreds of years leading to a build-up of pollution harming wildlife, contaminating food chains and damaging fisheries and aquaculture.		The researchers said that 30 million tonnes were dumped on land, and 50 million tonnes burnt, causing greenhouse gas emissions.			Doing so could also cut greenhouse gas emissions, reduce costs for businesses and governments, and create more jobs, the study said.						Even if governments and companies enact present commitments to curb the problem, from bans and product standards to investing in recycling and restricting trade in plastic waste, it would reduce the amount going into the oceans by only 7 per cent.	Even if governments and companies enact present commitments to curb the problem, from bans and product standards to investing in recycling and restricting trade in plastic waste, it would reduce the amount going into the oceans by only 7 per cent.	The changes would involve a big reduction in plastic production, substituting some with other materials, making more packaging reusable or recyclable, and improving waste collection in middle and low-income states.			The amount of plastic reaching the oceans could almost triple by 2040 without action to curb the problem, researchers have warned.	The changes would involve a big reduction in plastic production, substituting some with other materials, making more packaging reusable or recyclable, and improving waste collection in middle and low-income states.			The researchers said that 30 million tonnes were dumped on land, and 50 million tonnes burnt, causing greenhouse gas emissions.					The amount of plastic reaching the oceans could almost triple by 2040 without action to curb the problem, researchers have warned.	The amount of plastic reaching the oceans could almost triple by 2040 without action to curb the problem, researchers have warned.	That is the equivalent of 50kg of plastic washing into the seas for every metre of shoreline, their report, Breaking The Wave, said. Tom Dillon, Pew's vice president for environment, said: "There's no single solution but with rapid and concerted action we can break the plastic wave."						Tom Dillon, Pew's vice president for environment, said: "There's no single solution but with rapid and concerted action we can break the plastic wave."					The amount of plastic reaching the oceans could almost triple by 2040 without action to curb the problem, researchers have warned.	The researchers said that 30 million tonnes were dumped on land, and 50 million tonnes burnt, causing greenhouse gas emissions.
NA	3	3.11			Waste management is an often neglected area for governments in developing countries, where it is often left to an informal economy of waste pickers, who may suffer from exposure to pollutants and other dangers.				Governments could make drastic cuts to the flow of plastic reaching the oceans through measures such as restricting the sale and use of plastic materials, and mandating alternatives, but even if all the most likely measures are taken it would only cut the waste to little less than half of today's levels, the analysis found. All the efforts made and announced so far to cut plastic waste, by govern…			Such measures would require an investment of about $150bn globally in the next five years, but would yield $70bn in savings compared with the $670bn cost to governments of inefficient waste management between now and 2040, while cutting the greenhouse gas emissions associated with plastic by about a quarter, and creating as many as 700,000 jobs.	Waste management is an often neglected area for governments in developing countries, where it is often left to an informal economy of waste pickers, who may suffer from exposure to pollutants and other dangers.					Governments could make drastic cuts to the flow of plastic reaching the oceans through measures such as restricting the sale and use of plastic materials, and mandating alternatives, but even if all the most likely measures are taken it would only cut the waste to little less than half of today's levels, the analysis found. All the efforts made and announced so far to cut plastic waste, by govern…	All the efforts made and announced so far to cut plastic waste, by governments and companies, will reduce that projected volume by only about 7% by 2040. Governments must also create incentives for businesses to adopt new models such as reuse and refill systems, he urged. "[That would] level the playing field, where currently virgin plastic feedstock has a cost advantage over recycled materials."	More stringent measures would produce a drastic reduction in waste, according to the researchers. These include improving waste collection, particularly in the developing world, and recycling more waste, as well as investing in alternative materials and better product design to reduce the amount of plastic used.		Reddy called on governments and investors to curb the planned expansion of plastic production. "Without this, the supply of large quantities of cheap virgin plastic to the market may undermine reduction and substitution efforts and threaten the economic viability of recycling, while making it even harder to close the collection gap [between waste produced and waste collected for disposal]."	Stemming the flow is crucial because once plastic is in the ocean, most of it stays there forever, breaking down into microplastics that cause other problems, and efforts to clean waste from the oceans have so far had little impact. But action was needed urgently, he said, as once plastic reached the sea it was almost impossible to get it out again. Fletcher said: "The extent to which such a shif…	More stringent measures would produce a drastic reduction in waste, according to the researchers. These include improving waste collection, particularly in the developing world, and recycling more waste, as well as investing in alternative materials and better product design to reduce the amount of plastic used.								Plastic waste flowing into the oceans is expected to nearly triple in volume in the next 20 years, while efforts to stem the tide have so far made barely a dent in the tsunami of waste, research shows.	More stringent measures would produce a drastic reduction in waste, according to the researchers.	Plastic waste flowing into the oceans is expected to nearly triple in volume in the next 20 years, while efforts to stem the tide have so far made barely a dent in the tsunami of waste, research shows. If current trends continue, the amount of plastic waste polluting the oceans will grow to 29m tonnes a year by 2040, the equivalent of 50kg for every metre of coastline in the world. There is no si…		Plastic waste flowing into the oceans is expected to nearly triple in volume in the next 20 years, while efforts to stem the tide have so far made barely a dent in the tsunami of waste, research shows. More stringent measures would produce a drastic reduction in waste, according to the researchers. "That there is likely to be three times more plastic waste by 2040 is a shocking revelation," he sa…										More stringent measures would produce a drastic reduction in waste, according to the researchers. Despite rising public awareness of the plastic problem in the past five years, attempts to cut waste through plastic bag charges and bans on certain forms of microplastics have so far had little impact, said Simon Reddy, international environment director at the Pew Charitable Trusts, which led the r…			Despite rising public awareness of the plastic problem in the past five years, attempts to cut waste through plastic bag charges and bans on certain forms of microplastics have so far had little impact, said Simon Reddy, international environment director at the Pew Charitable Trusts, which led the research. "All the initiatives to date make very little difference. There is no silver bullet, ther…
NA	3	3.12					SINGAPORE, 23 Jul (Reuters) - The amount of plastic waste flowing into the ocean that kills marine life could triple over the next 20 years, unless businesses and governments can drastically reduce production, according to a new study published Thursday.											SINGAPORE, 23 Jul (Reuters) - The amount of plastic waste flowing into the ocean that kills marine life could triple over the next 20 years, unless businesses and governments can drastically reduce production, according to a new study published Thursday.	SINGAPORE, 23 Jul (Reuters) - The amount of plastic waste flowing into the ocean that kills marine life could triple over the next 20 years, unless businesses and governments can drastically reduce production, according to a new study published Thursday.	The strategy outlined in the report includes the reorientation of hundreds of billions of dollars of investment to produce plastics to alternative materials, recycling facilities and the expansion of waste collection in developing countries.			"It's going to get worse if we don't do anything."	The navigation chart to curb the plastic waste crisis in the ocean is one of the most detailed ones ever offered in a study. The strategy outlined in the report includes the reorientation of hundreds of billions of dollars of investment to produce plastics to alternative materials, recycling facilities and the expansion of waste collection in developing countries.					SINGAPORE, 23 Jul (Reuters) - The amount of plastic waste flowing into the ocean that kills marine life could triple over the next 20 years, unless businesses and governments can drastically reduce production, according to a new study published Thursday.			SINGAPORE, 23 Jul (Reuters) - The amount of plastic waste flowing into the ocean that kills marine life could triple over the next 20 years, unless businesses and governments can drastically reduce production, according to a new study published Thursday.	New research, from scientists and industry experts for The Pew Charitable Trusts and SYSTEMIQ, offers solutions that could reduce the projected volume of plastic entering the ocean by more than 80%.	However, if no action is taken, the amount of plastic entering the sea each year will increase from 11 million tonnes to 29 million tonnes, leaving a cumulative 600 million tons of waste in the ocean by 2040, the weight equivalent to 3 million blue whales, according to the study published in Science						The navigation chart to curb the plastic waste crisis in the ocean is one of the most detailed ones ever offered in a study. "Plastic pollution is something that affects everyone. It's not 'your problem and it's not my problem.' It's not a country's problem. It's everyone's problem," said Winnie Lau, senior manager of Pew and one of the authors of the study. "It's going to get worse if we don't d…						Consumption of single-use plastic has increased during the coronavirus pandemic, according to the International Solid Waste Association, an NGO. It's not 'your problem and it's not my problem.' It's not a country's problem. It's everyone's problem," said Winnie Lau, senior manager of Pew and one of the authors of the study.			It's not 'your problem and it's not my problem.' It's not a country's problem. It's everyone's problem," said Winnie Lau, senior manager of Pew and one of the authors of the study. "It's going to get worse if we don't do anything."
NA	3	3.13				The indirect negative effects of plastic waste on fisheries, tourism and maritime transport, for example, amount to $40 billion each year, according to the UN Environment Programme.	This is just the beginning and if nothing changes, it's going to turn into a real ecological disaster," said Joffrey Peltier, founder of the group It will triple in 2040 Although, in principle, plastic is protecting many people from possible contagion, in the short term it will be a major environmental problem.						On the other hand, although many countries had made progress in penalizing the use of the plastic bag, governments are again being seduced by this material. This is the case of the UK, where the tax was suspended to the stock exchange for online shopping deliveries. In Colombia, the Ministry of Health included food suppliers among its recommendations, using plastic bags and packaging to protect f…			The rebirth of the bag Social estrangement is also generating an avalanche of products shipped daily to households that are mostly wrapped or protected in plastic and/or icopor containers. For example, during Singapore's eight-week confinement, which began to be lifted on June 1, the 5.7 million residents discarded an additional 1,470 tons of plastic takeaway packaging, according to a Survey of t…				2020 promised to be a year in which many countries would advance their zero-plastic single-use policies. On the other hand, although many countries had made progress in penalizing the use of the plastic bag, governments are again being seduced by this material.	"We're all worried about this, but you can avoid it: if you buy a reusable head cap, if you wash your hands after touching any material and if you reduce the amount of plastic in your purchases," Céspedes said. But we can reduce our consumption of non-essential plastics, such as bags, film, icopor, cigarettes and food packaging for immediate consumption," more than 50 signatories mention in that …		But that's not all. Science warns us that it may be worse and too late if we don't act urgently.	"We're all worried about this, but you can avoid it: if you buy a reusable head cap, if you wash your hands after touching any material and if you reduce the amount of plastic in your purchases," Céspedes said.		For example, during Singapore's eight-week confinement, which began to be lifted on June 1, the 5.7 million residents discarded an additional 1,470 tons of plastic takeaway packaging, according to a Survey of the Master of Sciences in Environmental Management program at the National University of Singapore. This is the case of the UK, where the tax was suspended to the stock exchange for online s…	The UN warned this week that although the pandemic has had some positive impacts on the planet, such as the temporary reduction of greenhouse gas emissions, the use of plastic is growing with worrying force.	For example, during Singapore's eight-week confinement, which began to be lifted on June 1, the 5.7 million residents discarded an additional 1,470 tons of plastic takeaway packaging, according to a Survey of the Master of Sciences in Environmental Management program at the National University of Singapore. Organizations such as Greenpeace and WWF are based on research published in the Journal of…					The UN warned this week that although the pandemic has had some positive impacts on the planet, such as the temporary reduction of greenhouse gas emissions, the use of plastic is growing with worrying force. In addition, even if we reduced production and consumption, plastic pollution will not end. "So we could make effortsimmediately, the numbers say 460 million tons will be thrown into the eart…	The UN warned this week that although the pandemic has had some positive impacts on the planet, such as the temporary reduction of greenhouse gas emissions, the use of plastic is growing with worrying force. And this increase, according to the organization, comes from two sources: the waste from the fight against covid-19, which include plugs, gloves, disinfectant bottles and protective masks, am…		For several years, 17 experts developed a computer model capable of tracking plastic stocks and flows around the world and the numbers draw a devastating future. In addition, even if we reduced production and consumption, plastic pollution will not end. "So we could make effortsimmediately, the numbers say 460 million tons will be thrown into the earth and 250 million tons into the water," the re…									The UN warned this week that although the pandemic has had some positive impacts on the planet, such as the temporary reduction of greenhouse gas emissions, the use of plastic is growing with worrying force. But that's not all. Science warns us that it may be worse and too late if we don't act urgently.	2020 promised to be a year in which many countries would advance their zero-plastic single-use policies. The UN warned this week that although the pandemic has had some positive impacts on the planet, such as the temporary reduction of greenhouse gas emissions, the use of plastic is growing with worrying force. For Pamela Coke-Hamilton, director of international trade at the UN, plastics pollutio…			But that's not all. Science warns us that it may be worse and too late if we don't act urgently. Regardless of the increase in the pandemic, residues of this material flowing into the seas each year could nearly triple by 2040, a report published this week in the journal Science concluded. In addition, even if we reduced production and consumption, plastic pollution will not end. "So we could mak…
NA	3	3.14			Currently, approximately 11 million metric tons of plastic reach the oceans each year, causing incalculable damage to wildlife habitats and damage to humans and animals. Although some hydrocarbon-based plastics are broken down into small particles known as microplastics (which are harmful to humans and animals), they do not biodegrade, meaning that the accumulated amount of plastic in the ocean c…		Currently, approximately 11 million metric tons of plastic reach the oceans each year, causing incalculable damage to wildlife habitats and damage to humans and animals. Although some hydrocarbon-based plastics are broken down into small particles known as microplastics (which are harmful to humans and animals), they do not biodegrade, meaning that the accumulated amount of plastic in the ocean c…											While some governments and industries have pledged to reduce the use of plastic, the report's authors estimate that even if these commitments are met, plastic dumping would be reduced by only 7%.	While some governments and industries have pledged to reduce the use of plastic, the report's authors estimate that even if these commitments are met, plastic dumping would be reduced by only 7%.				Research found that if no action is taken, the amount of plastic garbage will grow to 29 million metric tons per year by 2040.	However, that path is not inevitable. It is possible to reduce the volume by 80%, taking steps to reduce the growth of virgin plastic production, improve waste collection systems around the world and invest in the creation of plastic materials that are easier to recycle. The report calls for an average of 500,000 people to be connected to the collection networks every day until 2040, at a total c…								(Bloomberg) -- The annual flow of plastics into our oceans will triple over the next 20 years, which could add up to 110 pounds of plastic garbage for every metre of coastline worldwide, according to a new report.	SystemIQ co-founder Martin Stuchtey says plastic systems are deeply intertwined, and that making improvements to one necessarily means improving everyone else. Still, he adds, some basic systems are critical to making a difference. For example, the report's authors determined that around 4 billion people worldwide will not receive organized waste collection services by 2040. Better waste processi…	The report also noted that the fight against covid-19 could make the challenge even more difficult, as the pandemic has increased consumption of single-use plastic.			"Even if we allow ambitious increases in recycling and material collection and replacement, we still cannot achieve this unless we freeze the production ofplastic at 2020 levels," he says. "Either refineries have to change their plans, or we have to recognize that there is no way to prevent increased ocean pollution."									"There is a path where we can have a substantial reduction," says Dr. Winnie Lau, co-author of the report and senior manager of the ocean plastics prevention program at Pew Charitable Trusts. "We chose numbers that were realistic to achieve but not easy." SystemIQ co-founder Martin Stuchtey says plastic systems are deeply intertwined, and that making improvements to one necessarily means improvin…			"There is a path where we can have a substantial reduction," says Dr. Winnie Lau, co-author of the report and senior manager of the ocean plastics prevention program at Pew Charitable Trusts. "We chose numbers that were realistic to achieve but not easy." SystemIQ co-founder Martin Stuchtey says plastic systems are deeply intertwined, and that making improvements to one necessarily means improvin…
NA	3	3.15			The potential consequences, says UNEP, which has produced a series of factsheets on the subject, include public health risks from infected used masks, and the open burning or uncontrolled incineration of masks, leading to the release of toxins in the environment, and to secondary transmission of diseases to humans.	Aside from the environmental damage, the financial cost, in areas such as tourism and fisheries, is estimated by the UN Environment Programme (UNEP) at around $40 billion.	Because of fears of these potential secondary impacts on health and the environment, UNEP is urging governments to treat the management of waste, including medical and hazardous waste, as an essential public service.		The potential consequences, says UNEP, which has produced a series of factsheets on the subject, include public health risks from infected used masks, and the open burning or uncontrolled incineration of masks, leading to the release of toxins in the environment, and to secondary transmission of diseases to humans. "The way countries have been using trade policy to fight plastic pollution has mos…			These products would be more environmentally-friendly and, as developing countries are key suppliers of many plastic substitutes, could provide the added benefit of providing new jobs.						Recent media reports, showing videos and photos of divers picking up masks and gloves, littering the waters around the French Riviera, were a wake-up call for many, refocusing minds on the plastic pollution issue, and a reminder that politicians, leaders and individuals need to address the problem of plastic pollution. Because of fears of these potential secondary impacts on health and the enviro…		"The way countries have been using trade policy to fight plastic pollution has mostly been uncoordinated, which limits the effectiveness of their efforts, says Ms. Coke-Hamilton. "There are limits to what any country can achieve on its own."	Recent media reports, showing videos and photos of divers picking up masks and gloves, littering the waters around the French Riviera, were a wake-up call for many, refocusing minds on the plastic pollution issue, and a reminder that politicians, leaders and individuals need to address the problem of plastic pollution.			A dramatic increase in innovation and investment, leading to technological advances, the report's study's authors conclude, would be necessary to deal comprehensively with the problem. Furthermore, UNCTAD is urging governments to promote non-toxic, biodegradable or easily recyclable alternatives, such as natural fibres, rice husk, and natural rubber.		Recent media reports, showing videos and photos of divers picking up masks and gloves, littering the waters around the French Riviera, were a wake-up call for many, refocusing minds on the plastic pollution issue, and a reminder that politicians, leaders and individuals need to address the problem of plastic pollution.				The study, "Breaking the Plastic Wave: A Comprehensive Assessment of Pathways Towards Stopping Ocean Plastic Pollution", which was endorsed by Inger Andersen, head of the UN environment agency UNEP, forecasts that, if no action is taken, the amount of plastics dumped into the ocean will triple by 2040, from 11 to 29 million tonnes per year.			Recent media reports, showing videos and photos of divers picking up masks and gloves, littering the waters around the French Riviera, were a wake-up call for many, refocusing minds on the plastic pollution issue, and a reminder that politicians, leaders and individuals need to address the problem of plastic pollution.	Recent media reports, showing videos and photos of divers picking up masks and gloves, littering the waters around the French Riviera, were a wake-up call for many, refocusing minds on the plastic pollution issue, and a reminder that politicians, leaders and individuals need to address the problem of plastic pollution. "The way countries have been using trade policy to fight plastic pollution has…						Whilst implementing these measures would make a huge dent in plastic pollution between now and 2040, the Pew/ Systemiq report acknowledges that, even in its best-case scenario, five million metric tons of plastics would still be leaking into the ocean every year. A dramatic increase in innovation and investment, leading to technological advances, the report's study's authors conclude, would be ne…	Recent media reports, showing videos and photos of divers picking up masks and gloves, littering the waters around the French Riviera, were a wake-up call for many, refocusing minds on the plastic pollution issue, and a reminder that politicians, leaders and individuals need to address the problem of plastic pollution.				The UN Environment Programme (UNEP) has warned that, if the large increase in medical waste, much of it made from environmentally harmful single-use plastics, is not managed soundly, uncontrolled dumping could result.	the UN trade body, UNCTAD, estimates that global sales will total some $166 billion this year, up from around $800 million in 2019. The UN Environment Programme (UNEP) has warned that, if the large increase in medical waste, much of it made from environmentally harmful single-use plastics, is not managed soundly, uncontrolled dumping could result.
NA	3	3.16							The amount of plastic flowing into the world's oceans is set to surge and businesses' efforts to reduce plastic waste will do little to stop it, according to a new study in the journal Science. The annual inflow of plastic could nearly triple from 2016 to 2040, the study found, and even if companies and governments meet all their commitments to tackle plastic waste, it would reduce the projection…									The annual inflow of plastic could nearly triple from 2016 to 2040, the study found, and even if companies and governments meet all their commitments to tackle plastic waste, it would reduce the projection for 2040 by only 7 per cent, still a more-than twofold increase in volume. The study's authors, the non-profit Pew Charitable Trust and sustainability consulting firm Systemiq, set out a range …	The annual inflow of plastic could nearly triple from 2016 to 2040, the study found, and even if companies and governments meet all their commitments to tackle plastic waste, it would reduce the projection for 2040 by only 7 per cent, still a more-than twofold increase in volume. The study's authors, the non-profit Pew Charitable Trust and sustainability consulting firm Systemiq, set out a range …	Over the past two years China has been making strides to improve waste management, including banning the import of plastic and other waste from developed countries like the US, which for decades have shipped much of their trash overseas. Indonesia has implemented its own restrictions on trash coming in from overseas, while politicians in the US are increasingly trying to find ways to improve the …			In comments published alongside the study, Pepsi chief executive Ramon Laguarta said "immediate bold action" was required, while Mars CEO Grant Reid said "we have much to do".	The study's authors, the non-profit Pew Charitable Trust and sustainability consulting firm Systemiq, set out a range of measures to stem the flow and called on businesses and governments to do more to reduce the use of plastic. They developed what they say is a first-of-its-kind model of the global plastics-supply chain - from production to consumption to disposal - using data and input from 17 …				China and Indonesia are likely the top sources of plastic reaching the oceans, accounting for more than a third of the plastic bottles, bags and other detritus washed out to sea, according to a study published in 2015 by Jenna Jambeck, an environmental engineer at the University of Georgia.				The amount of plastic flowing into the world's oceans is set to surge and businesses' efforts to reduce plastic waste will do little to stop it, according to a new study in the journal Science.	The study's authors, the non-profit Pew Charitable Trust and sustainability consulting firm Systemiq, set out a range of measures to stem the flow and called on businesses and governments to do more to reduce the use of plastic. They developed what they say is a first-of-its-kind model of the global plastics-supply chain - from production to consumption to disposal - using data and input from 17 …	The study's ocean-plastic forecast for 2040, which is based on the current trajectory, represents the equivalent of 50 kilograms of plastic for every metre of coastline in the world.			The amount of plastic flowing into the world's oceans is set to surge and businesses' efforts to reduce plastic waste will do little to stop it, according to a new study in the journal Science. The annual inflow of plastic could nearly triple from 2016 to 2040, the study found, and even if companies and governments meet all their commitments to tackle plastic waste, it would reduce the projection…						China and Indonesia are likely the top sources of plastic reaching the oceans, accounting for more than a third of the plastic bottles, bags and other detritus washed out to sea, according to a study published in 2015 by Jenna Jambeck, an environmental engineer at the University of Georgia.			The study's authors, the non-profit Pew Charitable Trust and sustainability consulting firm Systemiq, set out a range of measures to stem the flow and called on businesses and governments to do more to reduce the use of plastic. Consumer and regulatory pressure has prompted many of the world's biggest consumer-goods companies to commit to making all their packaging reusable, recyclable or compost…			"This is a dream we will have to give up that we can continue to grow plastic output and see collection and recycling systems easily pick up with it," said Martin Stuchtey, head of Systemiq.
NA	3	3.17					She added: "In the last week alone, new studies have shown that sharks swimming in UK waters have been ingesting plastic and that crabs in the Thames have plastic stuck in their stomachs. We now know that 94,000 pieces of microplastic flow down the Thames every second. That's 4 million pieces of plastic since you started reading my comment."					In addition to improving ocean health, adopting these changes could generate savings of $70bn (£55bn) for governments by 2040, relative to business-as-usual, the report says. Annual plastic-related greenhouse gas emissions would also be cut by 25 per cent, and more than 700,000 jobs could be created, the authors said.						Even if every pledge made by industry and governments around the world is met, there would only be a 7 per cent reduction in the plastic ending up in our oceans each year.	Even if every pledge made by industry and governments around the world is met, there would only be a 7 per cent reduction in the plastic ending up in our oceans each year.				The analysis by the Pew Charitable Trusts and Systemiq finds that without immediate and sustained action, the colossal annual flow of plastic into the ocean could devastate ecosystems around the planet unless urgent action is taken.	But the report offers a glimmer of hope, as the authors of the study also identified solutions they say could cut the additional volume of plastic going into the oceans by more than 80 per cent by 2040. These include: - Reducing growth in plastic production and consumption - Substituting some plastics with alternatives such as paper and compostable materials - Designing products and packaging for…		She added: "In the last week alone, new studies have shown that sharks swimming in UK waters have been ingesting plastic and that crabs in the Thames have plastic stuck in their stomachs. We now know that 94,000 pieces of microplastic flow down the Thames every second. That's 4 million pieces of plastic since you started reading my comment."		She added: "In the last week alone, new studies have shown that sharks swimming in UK waters have been ingesting plastic and that crabs in the Thames have plastic stuck in their stomachs. We now know that 94,000 pieces of microplastic flow down the Thames every second. That's 4 million pieces of plastic since you started reading my comment."				The quantity of plastic entering the world's oceans, already estimated to be 11 million tonnes every year, could triple in the next 20 years, alarming new research suggests.	But the report offers a glimmer of hope, as the authors of the study also identified solutions they say could cut the additional volume of plastic going into the oceans by more than 80 per cent by 2040.	If nothing is done, the overall quantity of plastic pollution could reach 600 million tonnes by 2040 - the equivalent of more than 3 million blue whales, or representative of 50 kilograms (110 pounds) of plastic on each metre of coastline worldwide.		The quantity of plastic entering the world's oceans, already estimated to be 11 million tonnes every year, could triple in the next 20 years, alarming new research suggests. The analysis by the Pew Charitable Trusts and Systemiq finds that without immediate and sustained action, the colossal annual flow of plastic into the ocean could devastate ecosystems around the planet unless urgent action is…							Louise Edge, senior campaigner at Greenpeace, said: "We all know we're using too much throwaway plastic, but this report demonstrates just how out of control our relationship with single-use plastic has become.			"There's no single solution to ocean plastic pollution, but through rapid and concerted action we can break the plastic wave," said Tom Dillon, Pew's vice president for environment. Martin Stuchtey, Systemiq founder and managing partner said: "Our results indicate that the plastic crisis is solvable. It took a generation to create this challenge; this report shows we can solve it in one generatio…
NA	3	3.18				Following the massive production of plastics used to maintain safety and hygiene, the UN warned that about 75% of plastic waste such as beards, gloves and disinfectant bottles will reach seas and landfills "at a serious cost to the environment and the economy." In addition, as indirect negative effects of plastic waste for fisheries, tourism and maritime transport, some $40 billion in losses is g…	Following the massive production of plastics used to maintain safety and hygiene, the UN warned that about 75% of plastic waste such as beards, gloves and disinfectant bottles will reach seas and landfills "at a serious cost to the environment and the economy."		"The way countries used trade policies to combat plastic pollution was largely uncoordinated, limiting the effectiveness of efforts. There are limits to what any country can achieve on its own," she said.			"Because many materials that could replace plastic require significant labor, changes in production and consumption patterns could create new jobs," she concluded.					Unctad also stated that social estrangement measures are leading to an increase in the shipment of products to households wrapped in a large amount of disposable materials.	"Plastic production and consumption are part of a global system that has many commercial dimensions. But the important role that global trade policies could play in the fight against plastics pollution did not bring the attention it deserves," Coke-Hamilton said. In addition to regulating plastic production and consumption, Unctad urged governments and companies to identify plastic substitutes th…	In addition to regulating plastic production and consumption, Unctad urged governments and companies to identify plastic substitutes that are not produced from fossil fuels such as glass, ceramics, natural fibres, paper, cardboard, rice shell, natural rubber and animal proteins.	"The way countries used trade policies to combat plastic pollution was largely uncoordinated, limiting the effectiveness of efforts. There are limits to what any country can achieve on its own," she said.								In addition, global sales of disposable masks are expected to increase from $800 million in 2019 to $166 billion by 2020, according to estimates by consultantic Grand View Research. In addition, as indirect negative effects of plastic waste for fisheries, tourism and maritime transport, some $40 billion in losses is generated each year, the UN Environment Programme calculated.					Plastic pollution was already one of the biggest threats to our planet before coronavirus. The rapid increase in daily use of certain products that help protect people and stop the spread of the virus is making things worse,"Pamela Coke-Hamilton, Director of International Trade at the United Nations Conference on Trade and Development (Unctad), said in a statement.							Following the massive production of plastics used to maintain safety and hygiene, the UN warned that about 75% of plastic waste such as beards, gloves and disinfectant bottles will reach seas and landfills "at a serious cost to the environment and the economy." "Plastic pollution was already one of the biggest threats to our planet before coronavirus. Developing countries are very active in the g…					Following the massive production of plastics used to maintain safety and hygiene, the UN warned that about 75% of plastic waste such as beards, gloves and disinfectant bottles will reach seas and landfills "at a serious cost to the environment and the economy."	Following the massive production of plastics used to maintain safety and hygiene, the UN warned that about 75% of plastic waste such as beards, gloves and disinfectant bottles will reach seas and landfills "at a serious cost to the environment and the economy." In addition to regulating plastic production and consumption, Unctad urged governments and companies to identify plastic substitutes that…
NA	3	3.19				The negative indirect effects of plastic waste on fisheries, tourism and shipping total an estimated $40 billion each year, according to the UN Environment Programme," the report said.						"Because many plastic substitutes also require a lot of labor, changes in production and consumption patterns could create new jobs," Coke-Hamilton said.								As a solution, UNCTAD mentioned that the 164 countries that make up the World Trade Organization (WTO) could more effectively address the fundamental problems of the global plastics economy.				In the meantime, UNCTAD recommended the use of non-toxic, biodegradable and plastic-replacement materials such as glass, ceramics, natural fibres, paper, cardboard, rice shell, natural rubber and animal proteins.				According to business consultancy Grand View Research, global sales of disposable sketch covers will rise from $800 million in 2019 to $166 billion in 2020, or 207 times more in just one year.					For the specialist, the sudden boom in daily use of such products that seek to keep people safe is negatively impacting the environment.			Plastic waste is enormous, the report of the United Nations (UN) unit said.										The United Nations Conference on Trade and Development (UNCTAD) noted that the confinement caused by the COVID-19 pandemic resulted in greenhouse gas emissions decreasing by five per cent worldwide, but not all are good news, as insulation also led to increased plastics consumption.
NA	3	3.2			They are believed to collect about 58% of all plastic recycled in the world, more than all the authorities put together, but their working conditions are not safe.				Another thing that was found was the huge amount of plastics that burn openly: although burning reduces the amount of waste that is thrown into land and seas, it generates potentially toxic fumes and contributes to greenhouse gas emissions.							About 95% of plastic packaging is used only once and this analysis showed that the biggest source of plastic contamination was un collected municipal solid waste, many from households.				The goal in high-income countries should be to reduce consumption, improve product design and recycling, while in low- and middle-income economies, waste collection needs to be improved and sorting and recycling invested.			Madrid, Jul 23 (EFE).- Seventeen experts have come together to develop a computer model capable of tracking plastic stocks and flows around the world and the numbers draw a devastating future: the residues of this material flowing into the seas every year could almost triple in 2040. Urge, they say, intervene.	Researchers are calling for comprehensive solutions for "a world drowning in plastic pollution" and one of the most effective steps is to increase waste collection with services and infrastructure. The goal in high-income countries should be to reduce consumption, improve product design and recycling, while in low- and middle-income economies, waste collection needs to be improved and sorting and…			Another thing that was found was the huge amount of plastics that burn openly: although burning reduces the amount of waste that is thrown into land and seas, it generates potentially toxic fumes and contributes to greenhouse gas emissions.					Madrid, Jul 23 (EFE).- Seventeen experts have come together to develop a computer model capable of tracking plastic stocks and flows around the world and the numbers draw a devastating future: the residues of this material flowing into the seas every year could almost triple in 2040. Urge, they say, intervene.	Madrid, Jul 23 (EFE).- Seventeen experts have come together to develop a computer model capable of tracking plastic stocks and flows around the world and the numbers draw a devastating future: the residues of this material flowing into the seas every year could almost triple in 2040. Urge, they say, intervene.			Madrid, Jul 23 (EFE).- Seventeen experts have come together to develop a computer model capable of tracking plastic stocks and flows around the world and the numbers draw a devastating future: the residues of this material flowing into the seas every year could almost triple in 2040. Urge, they say, intervene. Another thing that was found was the huge amount of plastics that burn openly: although…									Madrid, Jul 23 (EFE).- Seventeen experts have come together to develop a computer model capable of tracking plastic stocks and flows around the world and the numbers draw a devastating future: the residues of this material flowing into the seas every year could almost triple in 2040. Urge, they say, intervene.	Madrid, Jul 23 (EFE).- Seventeen experts have come together to develop a computer model capable of tracking plastic stocks and flows around the world and the numbers draw a devastating future: the residues of this material flowing into the seas every year could almost triple in 2040. Urge, they say, intervene.			Costas Velis of the University of Leeds notes that this research gives for the first time a complete view of "the astonishing quantities" of plastic waste that is dumped into terrestrial and aquatic ecosystems.
NA	3	3.21			But as the global health emergency has taken centre stage, many believe the battle to reduce plastic waste has been sidelined by both governments and conscientious consumers.				Hazardous medical waste is often incinerated on site in many western countries to prevent the transmission of infectious disease - a process that can lead to the release of toxic pollutants. "Other than burning them, there is nothing really we can do. It's designed to be waste," said Sander Defruyt, head of the plastics team at the Ellen MacArthur Foundation, a charity founded by the British yach…				Policies to curb the use of plastics have been placed on the backburner. Several countries, including the UK and Portugal, have delayed single-use plastic bans amid concerns around the transmission of Covid-19.					A study published on Thursday predicted the flow of plastic into oceans would nearly treble by 2040 to 29m tonnes per year if much greater action was not taken by governments and industry. Finding a solution to the plastic boom during and after the pandemic will require a joint effort between manufacturers and policymakers to rethink and regulate the entire lifecycle of products, experts say.	A study published on Thursday predicted the flow of plastic into oceans would nearly treble by 2040 to 29m tonnes per year if much greater action was not taken by governments and industry. Finding a solution to the plastic boom during and after the pandemic will require a joint effort between manufacturers and policymakers to rethink and regulate the entire lifecycle of products, experts say.		"Populations and governments are the only ones that can stop this," she said. "We need to opt for products that are more ecological and sustainable and prohibit the use of single-use plastics."		A study published on Thursday predicted the flow of plastic into oceans would nearly treble by 2040 to 29m tonnes per year if much greater action was not taken by governments and industry.	Reusing PPE is another option. Prof Sherman said that for most medical equipment, there was no evidence that patients were safer with single use items than reusable ones.		"It worries me a lot," Ms Barrera told the Financial Times from her Tenerife home. "From the first moment people began to wear gloves and masks, we've also begun to see them at sea. The problem is in how people use and dispose of their waste." The UK's health and social care department said it was unable to say how the 2bn pieces of protective equipment it procured would be disposed of, but that …				Sources: 'Production, use, and fate of all plastics ever made' by R. Geyer et al., Science Advances via The Economist; S&P Global Platts Recycled plastic has become more expensive than virgin materials $ per tonne 600 800 1,000 1,200 1,400 1,600 1,800 2012 13 14 15 16 17 18 19 20 PET Recycled PET The fate of plastics Global plastic production and use, 1950-2015, (bn tonnes) Total virgin plastic p…			"It worries me a lot," Ms Barrera told the Financial Times from her Tenerife home. "From the first moment people began to wear gloves and masks, we've also begun to see them at sea. The problem is in how people use and dispose of their waste." A study published on Thursday predicted the flow of plastic into oceans would nearly treble by 2040 to 29m tonnes per year if much greater action was not t…	But as the global health emergency has taken centre stage, many believe the battle to reduce plastic waste has been sidelined by both governments and conscientious consumers.			"It worries me a lot," Ms Barrera told the Financial Times from her Tenerife home. "From the first moment people began to wear gloves and masks, we've also begun to see them at sea. The problem is in how people use and dispose of their waste." "PPE is the tip of a mountain of toxic plastic waste that we've been ignoring for years," said Sian Sutherland, cofounder of A Plastic Planet, a not-forpro…					A study published on Thursday predicted the flow of plastic into oceans would nearly treble by 2040 to 29m tonnes per year if much greater action was not taken by governments and industry. "We're getting ourselves deeper and deeper into a plastics hole without knowing where any of it is going," said Martin Stuchtey, managing partner at SystemIQ, a sustainability group that co-authored the report.			"PPE is the tip of a mountain of toxic plastic waste that we've been ignoring for years," said Sian Sutherland, cofounder of A Plastic Planet, a not-forprofit group seeking to wean people off the material. The World Health Organization projected that PPE supplies would need to increase by 40 per cent monthly to meet demand during the pandemic, including an estimated 89m masks, 76m pairs of gloves…	The World Health Organization projected that PPE supplies would need to increase by 40 per cent monthly to meet demand during the pandemic, including an estimated 89m masks, 76m pairs of gloves and 1.6m pairs of goggles. Frost & Sullivan, a consulting firm, has predicted the US could generate an entire year's worth of medical waste in just two months. But governments are only now beginning to ref…			A study published on Thursday predicted the flow of plastic into oceans would nearly treble by 2040 to 29m tonnes per year if much greater action was not taken by governments and industry. "We're getting ourselves deeper and deeper into a plastics hole without knowing where any of it is going," said Martin Stuchtey, managing partner at SystemIQ, a sustainability group that co-authored the report.…
NA	3	3.24					SINGAPORE, July 24 — The amount of plastic waste flowing into the ocean and killing marine life could triple in the next 20 years, unless companies and governments can drastically reduce plastic production, a new study published yesterday said.		Some criticised the study’s inclusion of incineration, chemical recycling and plastic-to-fuel plants as ways to dispose of waste, saying these methods involve the release of climate-warming carbon emissions while also helping to sustain plastic production.	Some criticised the study’s inclusion of incineration, chemical recycling and plastic-to-fuel plants as ways to dispose of waste, saying these methods involve the release of climate-warming carbon emissions while also helping to sustain plastic production.				Big plastic makers, including ExxonMobil, Dow and Chevron Phillips Chemical, have said they are committed to tackling plastic pollution, despite increasing production. The projects they fund focus on cleaning up waste. The plastic industry has lobbied against government bans on single-use plastic. Some of the biggest buyers of plastic are consumer goods companies like Coca-Cola, PepsiCo, Nestle a…				SINGAPORE, July 24 — The amount of plastic waste flowing into the ocean and killing marine life could triple in the next 20 years, unless companies and governments can drastically reduce plastic production, a new study published yesterday said. The paper recommends, however, governments implement laws to discourage new plastic production and provide subsidies for reusable alternatives.	SINGAPORE, July 24 — The amount of plastic waste flowing into the ocean and killing marine life could triple in the next 20 years, unless companies and governments can drastically reduce plastic production, a new study published yesterday said. Big plastic makers, including ExxonMobil, Dow and Chevron Phillips Chemical, have said they are committed to tackling plastic pollution, despite increasin…				If no action is taken, however, the amount of plastic going into the sea every year will rise from 11 million tonnes to 29 million tonnes, leaving a cumulative 600 million tonnes swilling in the ocean by 2040, the equivalent weight of three million blue whales, according to the study published in the journal Science. “It’s going to get worse if we don’t do anything.”	The new research, produced by scientists and industry experts for The Pew Charitable Trusts and SYSTEMIQ, offers solutions that could cut the projected volume of plastic entering the ocean by more than 80 per cent. The strategy laid out in the report includes redirecting hundreds of billions of dollars in plastic production investment into alternative materials, recycling facilities and waste col…			Some criticised the study’s inclusion of incineration, chemical recycling and plastic-to-fuel plants as ways to dispose of waste, saying these methods involve the release of climate-warming carbon emissions while also helping to sustain plastic production.		Reuters			SINGAPORE, July 24 — The amount of plastic waste flowing into the ocean and killing marine life could triple in the next 20 years, unless companies and governments can drastically reduce plastic production, a new study published yesterday said.	“Plastic pollution is something that affects everyone. It isn’t a ‘your problem and not my problem’. It’s not one country’s problem. It’s everyone’s problem,” said Winnie Lau, senior manager at Pew and co-author of the study.	If no action is taken, however, the amount of plastic going into the sea every year will rise from 11 million tonnes to 29 million tonnes, leaving a cumulative 600 million tonnes swilling in the ocean by 2040, the equivalent weight of three million blue whales, according to the study published in the journal Science.		SINGAPORE, July 24 — The amount of plastic waste flowing into the ocean and killing marine life could triple in the next 20 years, unless companies and governments can drastically reduce plastic production, a new study published yesterday said. The roadmap for stemming the runaway ocean plastic waste crisis is among the most detailed ever offered in a study. If industry were allowed to continue w…							The plastic industry has lobbied against government bans on single-use plastic.	The new research, produced by scientists and industry experts for The Pew Charitable Trusts and SYSTEMIQ, offers solutions that could cut the projected volume of plastic entering the ocean by more than 80 per cent. Big plastic makers, including ExxonMobil, Dow and Chevron Phillips Chemical, have said they are committed to tackling plastic pollution, despite increasing production. The projects the…	“Plastic pollution is something that affects everyone. It isn’t a ‘your problem and not my problem’. It’s not one country’s problem. It’s everyone’s problem,” said Winnie Lau, senior manager at Pew and co-author of the study. “It’s going to get worse if we don’t do anything.”	Big plastic makers, including ExxonMobil, Dow and Chevron Phillips Chemical, have said they are committed to tackling plastic pollution, despite increasing production. The projects they fund focus on cleaning up waste. The plastic industry has lobbied against government bans on single-use plastic. Some of the biggest buyers of plastic are consumer goods companies like Coca-Cola, PepsiCo, Nestle a…			“Plastic pollution is something that affects everyone. It isn’t a ‘your problem and not my problem’. It’s not one country’s problem. It’s everyone’s problem,” said Winnie Lau, senior manager at Pew and co-author of the study. “It’s going to get worse if we don’t do anything.”
NA	3	3.3			Modern incinerators with air pollution control technology emit very few hazardous substances, but open burning releases potentially toxic emissions, poisoning the planet and potentially causing negative health outcomes for humans and animals.		Modern incinerators with air pollution control technology emit very few hazardous substances, but open burning releases potentially toxic emissions, poisoning the planet and potentially causing negative health outcomes for humans and animals.		Plastic waste is also being openly burnt, which reduces the amount of waste being discarded but can release toxic fumes and greenhouse gas emissions, they warn.							The biggest source of plastic pollution is uncollected solid municipal waste and a lot of it is from households, which relentlessly fill bin bags with food packaging on a weekly basis.		Scarily, this will happen even if governments act on their commitments to reduce plastic pollution, showing that more systemic changes are needed.					•'Immediate action' could reduce rate of plastic pollution by nearly 80% by 2040 •Scientists call for dramatic 'system-level change' in global plastics supply chain Even immediate efforts to reduce plastic pollution could leave Earth with 698 million tons (710 million metric tonnes) of waste by 2040, scientists estimate.	Improving waste collection services would be the single most influential factor in reducing pollution but a 'system-level change' in the global plastics supply chain is also needed to avoid the 700-million-ton-prediction becoming a reality. Reduce growth in plastic consumption to avoid nearly one-third of projected plastic waste generation by 2040.			'Burning is a double-edged sword - it reduces the amount of plastic that could eventually end up in the seas and on land but it also poses many other environmental problems, including a significant contribution to global warming.'					•Plastic waste flowing into the Earth's oceans every year could also nearly triple •Scientists call for dramatic 'system-level change' in global plastics supply chain Even immediate efforts to reduce plastic pollution could leave Earth with 698 million tons (710 million metric tonnes) of waste by 2040, scientists estimate.	The figures are from 17 global experts who have developed a computer model to track the stocks and flows of plastic around the world.	The amount of plastic entering the ocean each year would nearly triple, from 10.8 million tons to 28.5 million metric tons over the next 20 years, equivalent to nearly 110 pounds (50 kilograms) of plastic on each metre of coastline worldwide, they say. 'Burning is a double-edged sword - it reduces the amount of plastic that could eventually end up in the seas and on land but it also poses many ot…		•'Immediate action' could reduce rate of plastic pollution by nearly 80% by 2040 •But even in hopeful scenario 700 million tons will enter the environment by then •Plastic waste flowing into the Earth's oceans every year could also nearly triple •Scientists call for dramatic 'system-level change' in global plastics supply chain Even immediate efforts to reduce plastic pollution could leave Earth …									Plastic waste is also being openly burnt, which reduces the amount of waste being discarded but can release toxic fumes and greenhouse gas emissions, they warn.	The figures are from 17 global experts who have developed a computer model to track the stocks and flows of plastic around the world.
NA	3	3.3					The amount of plastic waste flowing into the ocean and killing marine life could triple in the next 20 years, unless companies and governments can drastically reduce plastic production, according to a new study.							This would require a U-turn by the energy industry, which is rapidly building new chemical plants around the world to boost plastic output as its traditional fuel business is eroded by a rise in cleaner energy sources. Big plastic producers, including ExxonMobil, Dow and Chevron Phillips Chemical, have said they are committed to tackling plastic pollution, despite increasing their output. The pro…				The amount of plastic waste flowing into the ocean and killing marine life could triple in the next 20 years, unless companies and governments can drastically reduce plastic production, according to a new study. The paper recommends, however, that governments implement laws to discourage new plastic production and provide subsidies for reusable alternatives.	The amount of plastic waste flowing into the ocean and killing marine life could triple in the next 20 years, unless companies and governments can drastically reduce plastic production, according to a new study. This would require a U-turn by the energy industry, which is rapidly building new chemical plants around the world to boost plastic output as its traditional fuel business is eroded by a …				The amount of plastic waste flowing into the ocean and killing marine life could triple in the next 20 years, unless companies and governments can drastically reduce plastic production, according to a new study. If no action is taken, however, the amount of plastic going into the sea every year will rise from 11 million tonnes to 29 million tonnes, leaving a cumulative 600 million tonnes swilling…	The new research, carried out by scientists and industry experts for The Pew Charitable Trusts and Systemiq, also offers solutions that could cut the projected volume of plastic entering the ocean by more than 80 per cent. The strategy laid out in the report includes redirecting hundreds of billions of dollars in plastic production investment into alternative materials, recycling facilities and w…								The amount of plastic waste flowing into the ocean and killing marine life could triple in the next 20 years, unless companies and governments can drastically reduce plastic production, according to a new study.	The new research, carried out by scientists and industry experts for The Pew Charitable Trusts and Systemiq, also offers solutions that could cut the projected volume of plastic entering the ocean by more than 80 per cent.	The road map for stemming the runaway ocean plastic waste crisis is among the most detailed ever offered in a study. If no action is taken, however, the amount of plastic going into the sea every year will rise from 11 million tonnes to 29 million tonnes, leaving a cumulative 600 million tonnes swilling in the ocean by 2040, the equivalent weight of three million blue whales, according to the stu…		The amount of plastic waste flowing into the ocean and killing marine life could triple in the next 20 years, unless companies and governments can drastically reduce plastic production, according to a new study.							The plastic industry, however, has lobbied against government bans on single-use plastic. Some of the biggest buyers of plastic are consumer goods companies such as Coca-Cola, PepsiCo, Nestle and Unilever.			Single-use plastic consumption has increased during the coronavirus pandemic, says the International Solid Waste Association, a non-governmental organisation. Big plastic producers, including ExxonMobil, Dow and Chevron Phillips Chemical, have said they are committed to tackling plastic pollution, despite increasing their output. The projects they fund focus on cleaning up waste.			"Plastic pollution is something that affects everyone. It isn't a 'your problem and not my problem'. It's not one country's problem. It's everyone's problem," said the study's co-author Winnie Lau, a senior manager at Pew. "It's going to get worse if we don't do anything."
NA	3	3.4					Millions of tons of plastic enter the oceans every year, polluting the seas, littering beaches and endangering wildlife. Microplastics are also eaten by fish and other sea creatures, where they enter the food chain.		If the world embarked on an immediate and globally-coordinated effort to reduce our plastic consumption, there would still be an estimated 710 million metric tons of plastic that will pollute the environment by 2040, new research has found. A rapid growth in plastic production, spurred by a rise in single-use plastics and a “throwaway” culture, has exacerbated the problem, the report said. Meanwh…													If the world embarked on an immediate and globally-coordinated effort to reduce our plastic consumption, there would still be an estimated 710 million metric tons of plastic that will pollute the environment by 2040, new research has found.		Instead, change is needed across the whole supply chain, they said, from the manufacturing of plastics, to pre-consumption (known as upstream) and after use (recycling and reusing) to stop the spread of plastic pollution into the environment.								If the world embarked on an immediate and globally-coordinated effort to reduce our plastic consumption, there would still be an estimated 710 million metric tons of plastic that will pollute the environment by 2040, new research has found.	The study, from a group of international researchers and published in the journal Science on Thursday, found that even in a “best-case scenario” where the amount of plastic pollution was reduced by 80 percent by 2040, there would still be a massive buildup of accumulated plastic.	The team found that there is no silver bullet solution to reducing global plastic pollution.		The study, from a group of international researchers and published in the journal Science on Thursday, found that even in a “best-case scenario” where the amount of plastic pollution was reduced by 80 percent by 2040, there would still be a massive buildup of accumulated plastic.										“There are billions of people without collection services right now. When certain groups say we can recycle our way out of it, you can’t recycle something you haven’t collected. You can’t dispose of something you haven’t collected,” said Dr. Winnie Lau, co-author of the study. The team noted that in many middle-income countries, such as India, informal workers and waste pickers made a living from…			“There are billions of people without collection services right now. When certain groups say we can recycle our way out of it, you can’t recycle something you haven’t collected. You can’t dispose of something you haven’t collected,” said Dr. Winnie Lau, co-author of the study.
NA	3	3.5					Plastic wreaks havoc on marine ecosystems, breaking down into tiny pieces. Microplastics have invaded all depths of the world’s oceans and a recent study found there may be double previous estimates. At least 600 wildlife species are impacted by ocean trash, according to Ocean Conservancy. Many fish species consume plastics debris by confusing it for real food, which then enters our food chain th…		Plastic waste in the ocean was previously tackled in areas of the world improving their waste management systems or companies banning and reducing plastic products like straws and bags. But researchers noted that neither of these options would properly mitigate the issue. Large corporations have offered to alter their packaging in the coming years to reduce plastic waste but the study found this …									The vast quantities forecast are based on the researchers' anticipation that the volume of plastic on the market will double by 2040, if governments and businesses fail to act. “The main focus is working on businesses and government because they actually have the power to change the system,” he added. This plan would demand that large corporations and businesses eliminate the plastics they no lon…	The vast quantities forecast are based on the researchers' anticipation that the volume of plastic on the market will double by 2040, if governments and businesses fail to act. “We very strongly believe trying to change the system as individuals is pretty much impossible. We’re focusing on changing the cards our people are being dealt by changing the options companies are offering to people,” Rob…				On top of the 29m tonnes of plastic predicted each year by 2040, if businesses and governments fail to take immediate action on the study's proposals, and delay for just five years, then an additional 80m tonnes would end up in the ocean by 2040.	Instead, a “comprehensive, circular economy approach” was recommended by the researchers as a way to rethink the current plastics market. This plan would demand that large corporations and businesses eliminate the plastics they no longer need, and go far beyond straws and plastic bags. New models would be necessary for customer delivery, with a focus on eliminating plastic packaging for individua…				Plastic wreaks havoc on marine ecosystems, breaking down into tiny pieces. Microplastics have invaded all depths of the world’s oceans and a recent study found there may be double previous estimates. At least 600 wildlife species are impacted by ocean trash, according to Ocean Conservancy. Many fish species consume plastics debris by confusing it for real food, which then enters our food chain th…				The volume of plastic entering the ocean annually could nearly triple in the next 20 years and by 2050 lead to more plastic in the planet's waters than fish, according to new analysis.	The vast quantities forecast are based on the researchers' anticipation that the volume of plastic on the market will double by 2040, if governments and businesses fail to act.							“The main focus is working on businesses and government because they actually have the power to change the system,” he added. “There is a very significant cost required of the next 20 years to fund the collection and recycling infrastructure,” Mr Opsomer said. “That requires a massive investment and ongoing operational cost to run that. Businesses will have to contribute and become more proactive…
NA	3	3.7							In the UK, there is a charge for single-use plastic bags, while plastic microbeads are banned. Plastic straws are soon set to follow. But according to the study, such measures will make little difference, with current government and industry commitments set to reduce the amount of plastic flowing into the sea by just seven per cent.												The report argues that a "total overhaul" of the global system - at a cost of £472bn - is needed to make a significant dent in ocean plastic waste. For consumers in the UK, Mr Shiran said this would mean a major a shift to reuse and refill models, alongside more paper and compostable packaging. Expanding waste collections in poorer countries will also be crucial.	The report argues that a "total overhaul" of the global system - at a cost of £472bn - is needed to make a significant dent in ocean plastic waste. For consumers in the UK, Mr Shiran said this would mean a major a shift to reuse and refill models, alongside more paper and compostable packaging. Expanding waste collections in poorer countries will also be crucial.	The volume of plastic flowing into the ocean every year is set to almost triple to 29 million tonnes a year by 2040, according to analysis. Unless immediate action is taken to stem the flow of plastic waste, within 20 years there could be enough floating in the oceans to coat every metre of coastline in 50kg of waste, researchers concluded. They revealed that, by 2040, the cumulative weight of pl…	The report argues that a "total overhaul" of the global system - at a cost of £472bn - is needed to make a significant dent in ocean plastic waste. For consumers in the UK, Mr Shiran said this would mean a major a shift to reuse and refill models, alongside more paper and compostable packaging. Expanding waste collections in poorer countries will also be crucial.		The report argues that a "total overhaul" of the global system - at a cost of £472bn - is needed to make a significant dent in ocean plastic waste. For consumers in the UK, Mr Shiran said this would mean a major a shift to reuse and refill models, alongside more paper and compostable packaging. Expanding waste collections in poorer countries will also be crucial. In the UK, there is a charge for …						The volume of plastic flowing into the ocean every year is set to almost triple to 29 million tonnes a year by 2040, according to analysis.	Unless immediate action is taken to stem the flow of plastic waste, within 20 years there could be enough floating in the oceans to coat every metre of coastline in 50kg of waste, researchers concluded. The findings are the result of a major study by The Pew Charitable Trusts and environmental consultancy firm SYSTEMIQ alongside scientists and experts from around the world, including teams from t…	They revealed that, by 2040, the cumulative weight of plastic in the ocean is set to reach 600 million tonnes, equivalent to more than three million blue whales.			But according to the study, such measures will make little difference, with current government and industry commitments set to reduce the amount of plastic flowing into the sea by just seven per cent.									Yoni Shiran, programme director for the study at SYSTEMIQ, told i the findings were "incredibly worrisome".			Yoni Shiran, programme director for the study at SYSTEMIQ, told i the findings were "incredibly worrisome". For consumers in the UK, Mr Shiran said this would mean a major a shift to reuse and refill models, alongside more paper and compostable packaging. Expanding waste collections in poorer countries will also be crucial.
NA	3	3.8				Because plastic can remain in the ocean for hundreds of years or longer, that means a huge build-up of pollution harming wildlife, contaminating food chains, and affecting the productivity of fisheries and aquaculture.	Because plastic can remain in the ocean for hundreds of years or longer, that means a huge build-up of pollution harming wildlife, contaminating food chains, and affecting the productivity of fisheries and aquaculture.		The cumulative amount of plastic in the world's oceans could reach 600 million tonnes, the study said. Even if governments and companies enact current commitments to curb the problem, from introducing bans and product standards to investing in recycling and restricting trade in plastic waste, it would only reduce the amount going into the oceans by 7%.			Doing so could also cut greenhouse gas emissions, reduce costs for businesses and governments, and create more jobs in the sector, the study argued.						The cumulative amount of plastic in the world's oceans could reach 600 million tonnes, the study said. Even if governments and companies enact current commitments to curb the problem, from introducing bans and product standards to investing in recycling and restricting trade in plastic waste, it would only reduce the amount going into the oceans by 7%.	The cumulative amount of plastic in the world's oceans could reach 600 million tonnes, the study said. Even if governments and companies enact current commitments to curb the problem, from introducing bans and product standards to investing in recycling and restricting trade in plastic waste, it would only reduce the amount going into the oceans by 7%.				THE amount of plastic ending up in the world's oceans could nearly triple by 2040 without major action to curb the problem, researchers have warned. The research suggests the amount of plastic that ends up polluting the seas will rise from 11 million tonnes a year in 2016 to 29 million tonnes in 2040 if no action is taken. That is the equivalent of 110lb (50kg) of plastic washing into the seas fo…	But a system-wide change to the way that plastic is handled, using existing interventions, could reduce the amount ending up in the seas by 80% compared with doing nothing, the report said. That involves a significant reduction in plastic production, substituting some plastic with other materials, making more packaging reusable or recyclable, and improving waste collection in middle and low-incom…								THE amount of plastic ending up in the world's oceans could nearly triple by 2040 without major action to curb the problem, researchers have warned.	THE amount of plastic ending up in the world's oceans could nearly triple by 2040 without major action to curb the problem, researchers have warned.	That is the equivalent of 110lb (50kg) of plastic washing into the seas for every metre of shoreline, the team's Breaking The Wave report said.			THE amount of plastic ending up in the world's oceans could nearly triple by 2040 without major action to curb the problem, researchers have warned.								THE amount of plastic ending up in the world's oceans could nearly triple by 2040 without major action to curb the problem, researchers have warned.	THE amount of plastic ending up in the world's oceans could nearly triple by 2040 without major action to curb the problem, researchers have warned.
PR	3	3.A world drowning in plastic pollution			"Those obnoxious substances are being breathed in by people who are working with waste and also in the communities that live nearby. Ed Cook, Research Fellow in the School of Civil Engineering at the University of Leeds and one of the scientists involved in the study, said: "Modern incinerators with air pollution control technology, emit very few hazardous substances. But with open burning, the c…		"Burning is a double-edged sword. I t reduces the amount of plastic that could eventually end up in the seas and on land but it also poses many other environmental problems, including a signi~cant contribution to global warming"	"Burning is a double-edged sword. I t reduces the amount of plastic that could eventually end up in the seas and on land but it also poses many other environmental problems, including a signi~cant contribution to global warming"	"Burning is a double-edged sword. I t reduces the amount of plastic that could eventually end up in the seas and on land but it also poses many other environmental problems, including a signi~cant contribution to global warming" The level of pollution is predicted to rise on an annual basis. In the year 2040, 1 33 million tonnes will be burnt and 77 million tonnes dumped on land, with 29 million …			"Although the report looks at the ~ows of plastic waste into the oceans, the bene~ts will extend far beyond the marine environment."				The analysis showed that the biggest source of plastic pollution was uncollected solid municipal waste, a lot of it from households. Ik twijfel of ik dit als human activity moet zetten, maar omdat het zo duidelijk huishoudelijk afval is, lijkt het me wel aan te spreken op society.		That will happen even if governments act on their commitments to reduce plastic pollution Dr Velis said: "Waste pickers are the unsung heroes of recycling in the Global South, without whom the mass of plastic entering the aquatic environment would be considerably greater. Thus, it is critical that supportive policies are implemented to eliminate the health and safety challenges and wider societal…	The scientists say there is no single magic bullet to reduce plastic pollution in the seas, and call for a range of interventions from industry and governments which they say are achievable.		Mr Cook said: "The interventions explored here are all achievable using existing and already mature technologies. The suite of approaches we've proposed is already within our capability - but it requires the political, societal and corporate will in order to achieve it.		"Unless the world acts, we estimate more than 1 .3 billion tonnes of plastic pollution will end up on land or in water bodies by 2040. Enormous as that ~gure is, it could be even bigger if it were not for the fact that a vast quantity of waste is openly burned - but that burning also carries a major environmental cost." The scientists say there is no single magic bullet to reduce plastic pollutio…	The study revealed that improving waste collection services would be the single most in~uential factor in reducing pollution. Integrated action can cut pollution - the single most e~ective step is to increase waste collection "Waste collection is indeed the most e~ective way to prevent pollution. Reducing growth in plastic production and consumption to avoid nearly one third of projected plastic …			For Dr Velis, the plastic pollution study has the potential to kickstart a scienti~c revolution, similar to the way that early reports from the Intergovernmental Panel on Climate Change began to raise awareness of global warming - and the steps needed to tackle it. "Burning is a double-edged sword. I t reduces the amount of plastic that could eventually end up in the seas and on land but it also …					Plastic waste ~owing into the seas each year could more than double by 2040, according to research Scientists track the fate of global plastic pollution, including open burning Integrated action can cut pollution - the single most e~ective step is to increase waste collection	Plastic waste ~owing into the seas each year could more than double by 2040, according to research Scientists track the fate of global plastic pollution, including open burning Integrated action can cut pollution - the single most e~ective step is to increase waste collection	The scientists say there is no single magic bullet to reduce plastic pollution in the seas, and call for a range of interventions from industry and governments which they say are achievable. "Burning is a double-edged sword. I t reduces the amount of plastic that could eventually end up in the seas and on land but it also poses many other environmental problems, including a signi~cant contributio…						In a groundbreaking study, they have revealed the scale of a problem caused by global waste management systems unable to cope with the increasing volume of plastic waste. Although the task is huge, the report says it is attainable and can be achieved using existing technology and know-how, by:				A conservative estimate indicates that there are at least 1 1 million waste pickers worldwide. This marginalised sector makes a living sifting through uncollected waste, looking for material that they can sellon for recycling. I t is believed they collect about 58 percent of all plastic material that is recycled worldwide - more than all the formal authorities put together. Dr Velis said: "Waste …	More than 1 .3 billion tonnes of plastic will be dumped on land and in the oceans over the period from 201 6 to 2040 unless the world acts, say a team of 1 7 global experts who have developed a computer model to track the stocks and ~ows of plastic around the world.	The lead investigator from Leeds was Dr Costas Velis, a Lecturer in Resource E~ciency Systems in the School of Civil Engineering who has been involved in various international initiatives to stem the ~ow of plastic into the oceans. Currently, around a quarter of all plastic waste is not collected, leaving individuals to dispose of it themselves. Ed Cook, Research Fellow in the School of Civil Eng…		The lead investigator from Leeds was Dr Costas Velis, a Lecturer in Resource E~ciency Systems in the School of Civil Engineering who has been involved in various international initiatives to stem the ~ow of plastic into the oceans. He said: "This scienti~c inquiry has for the ~rst time given us a comprehensive insight into the staggering amounts of plastic waste that are being dumped into the wor…
NA	6	6.2	336				Taking years to biodegrade, these objects constitute a hazard for the environment when they are not recycled.																									PARIS - A moth caterpillar commonly bred to provide fish bait feasts on a notoriously resistant plastic, scientists reported on Monday, raising hopes the creature can help in the fight against pollution.	PARIS - A moth caterpillar commonly bred to provide fish bait feasts on a notoriously resistant plastic, scientists reported on Monday, raising hopes the creature can help in the fight against pollution.	PARIS - A moth caterpillar commonly bred to provide fish bait feasts on a notoriously resistant plastic, scientists reported on Monday, raising hopes the creature can help in the fight against pollution.						PARIS - A moth caterpillar commonly bred to provide fish bait feasts on a notoriously resistant plastic, scientists reported on Monday, raising hopes the creature can help in the fight against pollution.						"This discovery could be an important tool for helping to get rid of the polyethylene plastic waste accumulated in landfill sites and oceans," said Cambridge University professor Paolo Bombelli, co-author of a study published in the journal Current Biology. In the European Union, 38 percent of plastic is thrown out in landfills. The find happened by accident at the home of the study's lead author…			"This discovery could be an important tool for helping to get rid of the polyethylene plastic waste accumulated in landfill sites and oceans," said Cambridge University professor Paolo Bombelli, co-author of a study published in the journal Current Biology. "When I went to clean them for reuse in the spring, they were infested with (wax) worms," the researcher said. "So I put them in a bag. Then,…
NA	6	6.24	528																					Researchers in Europe have found that the larvae of a common insect have an unusual ability to digest plastic, a discovery that could lead to biotechnical advances that help deplete the continual buildup of one of the world's most stubborn pollutants. ''It's certainly not going to be the case that within six months we've solved the world's plastic problem,'' he said. ''I certainly wouldn't want y…								Researchers in Europe have found that the larvae of a common insect have an unusual ability to digest plastic, a discovery that could lead to biotechnical advances that help deplete the continual buildup of one of the world's most stubborn pollutants.	Researchers in Europe have found that the larvae of a common insect have an unusual ability to digest plastic, a discovery that could lead to biotechnical advances that help deplete the continual buildup of one of the world's most stubborn pollutants.					He cautioned, however, that it would be at least several years before the initial discovery could lead to such a result. ''It's certainly not going to be the case that within six months we've solved the world's plastic problem,'' he said. ''I certainly wouldn't want your readers to think that within a few months, they can start throwing away plastic bags without worrying about it.''								Researchers in Europe have found that the larvae of a common insect have an unusual ability to digest plastic, a discovery that could lead to biotechnical advances that help deplete the continual buildup of one of the world's most stubborn pollutants. Federica Bertocchini, a scientist with the Spanish National Research Council, stumbled upon the insects' unusual ability several years ago. An amat…			In an interview Wednesday, Mr. Howe explained that it was important to determine whether the worms -- which are the larval form of the greater wax moth and are commercially bred to be used by fishermen -- were actually breaking chemical bonds in the plastic, and not just chewing the material down into smaller pieces. ''We think that it's some enzyme that's involved,'' Mr. Howe said. ''We don't kn…
NA	6	6.25	469	3			There are large plumes of plastic waste floating around in our oceans refusing to go away and finding their way to the stomachs of marine animals. In March two sperm whales who beached on Germany's coast were found with plastics and car parts in their bellies.They are neither the first nor the last.								Not much has changes in the recent years. A 2015 Central Pollution Control Board surveyfound that 60 of India's major cities generated 15,000 tonnes of plastic waste every day. Of the waste that is collected an overwhelming amount of waste is neither recycled nor treated, it lands up in landfills or is dumped in water bodies.											Not much has changes in the recent years. A 2015 Central Pollution Control Board surveyfound that 60 of India's major cities generated 15,000 tonnes of plastic waste every day. Of the waste that is collected an overwhelming amount of waste is neither recycled nor treated, it lands up in landfills or is dumped in water bodies. This is why many corners of the planet are infested with the material. …		Not much has changes in the recent years. A 2015 Central Pollution Control Board surveyfound that 60 of India's major cities generated 15,000 tonnes of plastic waste every day. Of the waste that is collected an overwhelming amount of waste is neither recycled nor treated, it lands up in landfills or is dumped in water bodies.	Published by HT Digital Content Services with permission from Hindustan Times. For any query with respect to this article or any other content requirement, please contact Editor at htsyndication@hindustantimes.com				The exact way in which the worms break down the plastic is being studied but the scientists suggest that the make-up of beeswax is similar to that of polythene so the worm can used the same mechanism to degrade both.	New Delhi, April 25 -- A few years ago when the Supreme Court heard of the status of plastic pollution in India the bench remarked "We are sitting on a plastic time bomb."						New Delhi, April 25 -- A few years ago when the Supreme Court heard of the status of plastic pollution in India the bench remarked "We are sitting on a plastic time bomb." This is why many corners of the planet are infested with the material. There are large plumes of plastic waste floating around in our oceans refusing to go away and finding their way to the stomachs of marine animals. In March …			Not much has changes in the recent years. A 2015 Central Pollution Control Board surveyfound that 60 of India's major cities generated 15,000 tonnes of plastic waste every day.			New Delhi, April 25 -- A few years ago when the Supreme Court heard of the status of plastic pollution in India the bench remarked "We are sitting on a plastic time bomb." Not much has changes in the recent years. A 2015 Central Pollution Control Board surveyfound that 60 of India's major cities generated 15,000 tonnes of plastic waste every day. Now, a chance by Spanish scientist, Federica Berto…			"There was only one explanation: the worms had made the holes and had escaped. This project began there and then," said the scientist, who along with researchers at the University of Cambridge in UK discovered that the worms were capable of degrading polythene, one of the toughest material in the world. "One hundred wax worms are capable of biodegrading 92 milligrams of polyethylene in 12 hours, …
NA	6	6.28	920		"'Biodegradation' is not a magical solution to plastics waste management," said Ramani Narayan, professor of chemistry and biochemical engineering at Michigan State University. "Release of small fragments [microplastics] into the terrestrial and ocean environment has been shown to cause harm to the environment and to human health."		"'Biodegradation' is not a magical solution to plastics waste management," said Ramani Narayan, professor of chemistry and biochemical engineering at Michigan State University. "Release of small fragments [microplastics] into the terrestrial and ocean environment has been shown to cause harm to the environment and to human health."		"'Biodegradation' is not a magical solution to plastics waste management," said Ramani Narayan, professor of chemistry and biochemical engineering at Michigan State University. "Release of small fragments [microplastics] into the terrestrial and ocean environment has been shown to cause harm to the environment and to human health."	One researcher not involved in the study indicated it is misleading to speculate the results of the study could point the way to combat plastic litter. Critics speculate the "signature" ethylene glycol could have arisen by some other mechanism. Also, it's not known if the approach would turn plastic litter into thousands of small bits that are themselves a pollution problem because creatures can …														Narayan indicated other routes are preferred to reduce plastic litter. Truly biodegradable plastic could be mixed with food waste for digestion in a composter. Recycling of plastic waste or converting the waste to energy may be more viable than biodegradation.								Can worms show the way to tackle the plastic litter problem? Incongruous as it may seem, that question could be serious, given the discovery that certain caterpillars seem able to digest and biodegrade polyethylene film.	Researchers in Spain and England say they found that the so-called wax worm, normally bred for fishing bait, can munch on PE bags, creating holes in the bag, and leaving behind what could be signature degradation products of PE.	"'Biodegradation' is not a magical solution to plastics waste management," said Ramani Narayan, professor of chemistry and biochemical engineering at Michigan State University. "Release of small fragments [microplastics] into the terrestrial and ocean environment has been shown to cause harm to the environment and to human health."				"The main thing is the plastics breakdown," Howe said. Critics speculate the "signature" ethylene glycol could have arisen by some other mechanism. Also, it's not known if the approach would turn plastic litter into thousands of small bits that are themselves a pollution problem because creatures can ingest them and the particles can attract and hold other pollutants.								Researchers in Spain and England say they found that the so-called wax worm, normally bred for fishing bait, can munch on PE bags, creating holes in the bag, and leaving behind what could be signature degradation products of PE. Bertocchini and colleagues deduce the worms can break the C-C bonds in PE similar to their apparent ability to break the bonds in beeswax. "'Biodegradation' is not a magi…			Howe said in a telephone interview that Bertocchini contacted him and Bombelli to invite them to join in the research. Howe's usual work is in bioremediation, renewable energy and photosynthesis. Howe said the discovery echoes natural processes in oceans whereby hydrocarbons are broken down by microbes. One class of microbes biodegrades long-chain molecules and those degradation products are then…
NA	6	6.3	359						It is impractical to use waxworms themselves in waste disposal, but ultimately Dr Bertocchini's hope is to isolate the chemical process they use and replicate it.																Because it does not biodegrade it breaks down into tiny pieces and enters the food chain, or it forms great "rubbish islands" in the middle of the ocean.								An estimated eight million tonnes of plastic waste is deposited in the oceans every year. Because it does not biodegrade it breaks down into tiny pieces and enters the food chain, or it forms great "rubbish islands" in the middle of the ocean. The waxworm may be one of scientists' strongest leads in their attempts to find a way to prevent this.	The solution to plastic pollution in the oceans has been dangling right in front of fish's noses, if only they had known.					The solution to plastic pollution in the oceans has been dangling right in front of fish's noses, if only they had known. Waxworms are normally used by anglers as bait, but after centuries of enticing fish to their doom it turns out they may also be able to save them because it has been discovered that they can digest plastic. An estimated eight million tonnes of plastic waste is deposited in the…							The waxworm may be one of scientists' strongest leads in their attempts to find a way to prevent this. As well as being used by fishermen, the waxworm is a pest that attacks beehives. That was how Federica Bertocchini, a biologist from Cantabria University in Spain and a keen beekeeper, came across it.			"I was cleaning, and I realised they were full of these wax worms," she said. She used a plastic bag to try to remove them and left it there. "I came back and realised it was full of holes, and these worms were all crawling around." "We know polyethylene has long chains, with a very strong and resilient chemical bond. Wax is also a complex molecule, and the bond is there too. Maybe because of thi…
NA	6	6.30	1005						But real hurdles stand between these iron-gutted organisms and a plastic-free planet, not the least of which is getting them to do our bidding and pick plastic over other, possibly tastier, foods. Even at the "fast rate" of 184 milligrams per day, it would take the 100-worm posse nearly 15 years to dispose of one kilogram of plastic. And we dump about eight billion kilograms into the oceans each …							Collectively we produce hundreds of millions of tons of plastic yearly, of which polyethylene makes up about 40 percent. Perhaps 8 million of those tons end up in the ocean, where they break down into omnipresent shards now making their way as far as the Arctic. What large-scale effects this environmental newcomer could have is completely unknown.												The team of Japanese researchers who isolated the I. sakaiensis bacteria last year took a similar tack, finding two enzymes (which they dubbed PETase and MHETase) capable of breaking up the long chains of plastic molecules found in water bottles. Next they aim to "enhance the activity level and stability of these newly discovered microbial enzymes."				Despite living just six or seven weeks, they may be able to take down an enemy that lingers for centuries. The lowly caterpillar Galleria mellonella, also known as the wax worm, can digest a type of plastic commonly found in packaging, according to a paper published Monday in Current Biology.	The finding continues a string of recently discovered plastic-eating organisms that has some scientists hoping nature might share some of its tricks and help us rid the environment of the alien materials.	"When it comes to microbial breakdown, it's like asking teenagers to clean their rooms on the weekend," explains Reddy. "They may do it, they may not do it. They may do a little. They may do the easiest way first."						"Frankly, it's exciting science," says Reddy. "Nature is the best chemist, and we have to celebrate that."		"We're designing chemicals and we're designing products because of their stability. We're a victim of our own success," says Dr. Reddy in a phone interview.							"which really is very fast," according to Bertocchini. Bertocchini suspects that tool might be a powerful enzyme, a large molecule that helps along chemical reactions. "We still don't know the details of how this biodegradation occurs, but there is a possibility that an enzyme is responsible. The next step is to detect, isolate, and produce this enzyme in vitro on an industrial scale," she said. …
NA	6	6.50	299	1								In 2010 it brought in EUR 17.4 million, this fell to EUR 13.8 million by 2012, and again to EUR 12.7 million in 2014. The figure for 2015 was EUR 11.7 million.			Most recent figures show that each year Ireland produces 169,000 tonnes of plastic packaging waste, on average about 37kg per person.	Most recent figures show that each year Ireland produces 169,000 tonnes of plastic packaging waste, on average about 37kg per person.		Recycling targets European Union parliament directives have set minimum plastic recycling targets for Ireland to reach in the coming years. Ireland has signed up to recycle 22 per cent of its plastic packaging waste back into other plastic products.		Recycling targets European Union parliament directives have set minimum plastic recycling targets for Ireland to reach in the coming years. Ireland has signed up to recycle 22 per cent of its plastic packaging waste back into other plastic products. Ireland has been attempting to reduce the amount of plastic bags and packaging it produces.	The 15 cent plastic bag levy was introduced in 2002 in order to encourage people to cut down on the amount of plastic waste they use and throw out.			The 15 cent plastic bag levy was introduced in 2002 in order to encourage people to cut down on the amount of plastic waste they use and throw out.	The scientist behind the moth larvae discovery said "plastic is a global problem". He added: "Nowadays waste can be found everywhere, including in rivers and oceans."	Most recent figures show that each year Ireland produces 169,000 tonnes of plastic packaging waste, on average about 37kg per person Environmental Protection Agency statistics from January show Ireland is just under halfway to reaching this target. In comparison, Ireland is 80 per cent of the way towards achieving its EU recycling targets for paper, metals and glass.		Environmental Protection Agency statistics from January show Ireland is just under halfway to reaching this target.				Moth larvae could revolutionise how the world disposes of plastic waste after an accidental discovery by a scientist and amateur beekeeper.	Moth larvae could revolutionise how the world disposes of plastic waste after an accidental discovery by a scientist and amateur beekeeper.						Moth larvae could revolutionise how the world disposes of plastic waste after an accidental discovery by a scientist and amateur beekeeper. Molecular process "The next steps for us will be to try and identify the molecular processes in this reaction and see if we can isolate the enzyme responsible" she stated. Ireland has been attempting to reduce the amount of plastic bags and packaging it produ…							Recycling targets European Union parliament directives have set minimum plastic recycling targets for Ireland to reach in the coming years. Ireland has signed up to recycle 22 per cent of its plastic packaging waste back into other plastic products. Dr Bertocchini outlined that "the caterpillars are not just eating the plastic without modifying its chemical make-up".
NA	6	6.8	824	1					(Nor did the study convince all biodegradation experts that animals can fully digest plastic. To the Atlantic, University of Michigan chemical engineer Ramani Narayan, who was not involved with this work, expressed concerns that wax worms could exacerbate problems by leaving tiny plastic crumbs in their wake. Biodegradation isnt a magical solution to plastics waste management, Narayan said.)	(Nor did the study convince all biodegradation experts that animals can fully digest plastic. To the Atlantic, University of Michigan chemical engineer Ramani Narayan, who was not involved with this work, expressed concerns that wax worms could exacerbate problems by leaving tiny plastic crumbs in their wake. Biodegradation isnt a magical solution to plastics waste management, Narayan said.)						The shopping bag is an infamous source of plastic pollution. The 2010 documentary Bag It estimated that Americans use 102 billion plastic bags per year. Bags are persistent. Plastic at the waste dump can last for an estimated 1,000 years. And they are pernicious.		A wild baby manatee named Emoji died in a Florida zoo in February after filling its guts with plastic bags and other litter. To curb our reliance on cheap plastic, Washington began levying 5-cent bag fees in 2009. Several other municipalities have followed suit.						A wild baby manatee named Emoji died in a Florida zoo in February after filling its guts with plastic bags and other litter. To curb our reliance on cheap plastic, Washington began levying 5-cent bag fees in 2009. Several other municipalities have followed suit.		The shopping bag is an infamous source of plastic pollution. The 2010 documentary Bag It estimated that Americans use 102 billion plastic bags per year. Bags are persistent. Plastic at the waste dump can last for an estimated 1,000 years. And they are pernicious. A wild baby manatee named Emoji died in a Florida zoo in February after filling its guts with plastic bags and other litter. To curb ou…		In 2015, scientists at Stanford University reported that mealworms, the beetle larvae used as fishing bait (and occasionally dusted with barbecue seasoning, as in eco-friendly snacks), can turn Styrofoam into carbon dioxide and droppings. In 2016, Japanese researchers discovered that microbes living close to a bottle-recycling plant could metabolize plastic. The shopping bag is an infamous source…					Federica Bertocchini, a biologist at Spains Institute of Biomedicine and Biotechnology of Cantabria and a hobbyist beekeeper, used such a bag to collect pests called wax worms. The caterpillars, the larvae of the moth Galleria mellonella, had infested her hives, chowing down on honey and wax.							The new report did not prove that the caterpillars were the responsible organisms. At this point in time, we do not know if the caterpillars themselves are producing a digestive enzyme or might it be bacteria in their gut, wrote Bombelli, a biochemist at the University of Cambridge, to The Washington Post. Or it might be a bit of both! But the authors of the new study do not envision dumping buck…						Federica Bertocchini, a biologist at Spains Institute of Biomedicine and Biotechnology of Cantabria and a hobbyist beekeeper, used such a bag to collect pests called wax worms. The caterpillars, the larvae of the moth Galleria mellonella, had infested her hives, chowing down on honey and wax. The scientist contacted her colleagues at the University of Cambridge, Paolo Bombelli and Christopher How…			It was very exciting to find this, mainly because me and Paolo and Chris have been talking about this plastic biodegradation issue for a few years, Bertocchini said. Compared with the bacteria found near the recycling facility, the wax worm is way faster, really faster, Bertocchini said. (When degrading plastic, though, speed is a relative term.) In the new study, it took 100 worms roughly 12 hou…
NA	6	6.96	497													Polyethylene is largely used in packaging, and accounts for 40% of total demand for plastic products across Europe – where up to 38% of plastic is discarded in landfills. People around the world use around a trillion plastic bags every year.																Caterpillars can mow through plastic waste by biodegrading polyethylene, one of the toughest and most used plastics that frequently clogs landfill sites.	The humble caterpillar can be the answer to dealing with the growing mountains of plastic waste around the world, according to new research that shows it breaks down chemical bonds in plastic used for bags and packaging at unusually high speeds. The humble caterpillar can be the answer to dealing with the growing mountains of plastic waste around the world, according to new research that shows it…						The humble caterpillar can be the answer to dealing with the growing mountains of plastic waste around the world, according to new research that shows it breaks down chemical bonds in plastic used for bags and packaging at unusually high speeds. “The caterpillars are not just eating the plastic without modifying its chemical make-up. We showed that the polymer chains in polyethylene plastic are a…							The humble caterpillar can be the answer to dealing with the growing mountains of plastic waste around the world, according to new research that shows it breaks down chemical bonds in plastic used for bags and packaging at unusually high speeds. The humble caterpillar can be the answer to dealing with the growing mountains of plastic waste around the world, according to new research that shows it…
NA	6	6.98	530									In 2010, the government’s plastic bag levy brought in €17.4 million, before falling to €13.8 million by 2012, and again to €12.7 million in 2014. The most recent figures available show the State brought in €11.7 million from the plastic bag levy in 2015.			Most recent figures show that each year Ireland produces 169,000 tonnes of plastic packaging waste, on average about 37kg per person.	Most recent figures show that each year Ireland produces 169,000 tonnes of plastic packaging waste, on average about 37kg per person.		European Union parliament directives have set minimum plastic recycling targets for Ireland to reach in the coming years.		Ireland has signed up to aim to recycle 22 per cent of its plastic packaging waste back into other plastic products. In comparison the State is 80 per cent of the way towards achieving its EU recycling targets for paper, metals, and glass. The State has been attempting to reduce the amount of plastic bags and packaging it produces. The 15 cent plastic bag levy was introduced back in 2002 in order…	The State has been attempting to reduce the amount of plastic bags and packaging it produces. The 15 cent plastic bag levy was introduced back in 2002 in order to encourage Irish people to cut down on the amount of plastic waste they use and throw out.			The 15 cent plastic bag levy was introduced back in 2002 in order to encourage Irish people to cut down on the amount of plastic waste they use and throw out.		Most recent figures show that each year Ireland produces 169,000 tonnes of plastic packaging waste, on average about 37kg per person. The State has been attempting to reduce the amount of plastic bags and packaging it produces. The 15 cent plastic bag levy was introduced back in 2002 in order to encourage Irish people to cut down on the amount of plastic waste they use and throw out.		According to the Environmental Protection Agency (EPA) statistics from January 2017, Ireland is just under halfway to reaching its target for recycling plastic waste. Figures from the Department of Environment show the government’s intake from the plastic bag levy has consistently dropped since 2010, indicating a fall in the number of plastic bags sold.				Moth larvae could potentially revolutionise how the world disposes of plastic waste after an accidental discovery by a scientist and amateur beekeeper.	Moth larvae could potentially revolutionise how the world disposes of plastic waste after an accidental discovery by a scientist and amateur beekeeper.						Moth larvae could potentially revolutionise how the world disposes of plastic waste after an accidental discovery by a scientist and amateur beekeeper.							Spanish scientist Dr Federica Bertocchini has found that wax moth larvae, commonly used as fish bait, are able to eat through plastic.
NA	6	6.17	277	8																				The global plastic bag crisis could be solved by a waxworm capable of eating through the material at "uniquely high speeds," scientists have announced. "If a single enzyme is responsible for this chemical process, its reproduction on a large scale using biotechnological methods should be achievable."								The global plastic bag crisis could be solved by a waxworm capable of eating through the material at "uniquely high speeds," scientists have announced.	The global plastic bag crisis could be solved by a waxworm capable of eating through the material at "uniquely high speeds," scientists have announced.							The global plastic bag crisis could be solved by a waxworm capable of eating through the material at "uniquely high speeds," scientists have announced. Researchers have described the caterpillar's ability to break down even the toughest plastics as "extremely exciting." Around a trillion plastic bags are used worldwide each year, of which a huge number find their way into the oceans or are discar…				"If a single enzyme is responsible for this chemical process, its reproduction on a large scale using biotechnological methods should be achievable."		The global plastic bag crisis could be solved by a waxworm capable of eating through the material at "uniquely high speeds," scientists have announced. The waxworm's potential was discovered when Federica Bertocchini, a biologist and amateur beekeeper, cleaned out her hives and placed the parasites in a plastic bag.			"It's extremely, extremely exciting because breaking down plastic has proved so challenging," said Paolo Bombelli from Cambridge University.
NA	6	6.1	532						While Bertocchini, Bombelli and Howe's work is exciting in the face of a planet filling with plastic, much research needs to be done before waxworms could be used to help break it down. For example, waxworms love to attack beehives, as Bertocchini noticed in the beginning, and the caterpillars could easily abandon plastic and give their full attention to hives if released en masse, along with any…															Many of the world's greatest scientific breakthroughs happened in laboratories, but every so often, curious discoveries are fueled by chance. A recent example of such a discovery - caterpillars who can chew and potentially digest plastic - might help eat away the tons of plastic waste in landfills all over the earth which would otherwise stay put for centuries or more. While Bertocchini, Bombelli…								Many of the world's greatest scientific breakthroughs happened in laboratories, but every so often, curious discoveries are fueled by chance. A recent example of such a discovery - caterpillars who can chew and potentially digest plastic - might help eat away the tons of plastic waste in landfills all over the earth which would otherwise stay put for centuries or more.	Biologist Federica Bertocchini was tending her beehives at home when she						At any rate, innovations for degrading the vast amounts of plastic on the earth are underway, with hopefully more ideas to come soon, be they biological or by another mode.					In an interview with The Economist, Bertocchini noted that the ideal goal would be to "identify the enzymes that they [the worms] are using to degrade polyethylene," in order to potentially "produce it at high-scale rather than using a million worms in a plastic bag." At any rate, innovations for degrading the vast amounts of plastic on the earth are underway, with hopefully more ideas to come so…		Biologist Federica Bertocchini University of Cambridge biochemists Paolo Bombelli and Christopher Howe			According to The Atlantic, as she realized that the worms had eaten their way out of the bag, Bertocchini wondered: "Were the waxworms actually digesting the plastic?" Bombelli and Howe "pointed out that, like beeswax, many plastics are held together by structures called methylene bridges (molecular units consisting of one carbon and two hydrogen atoms, with the carbon also linked to two other at…
NA	6	6.32	509													Around a trillion plastic bags are used around the world each year, of which a huge number find their way into the oceans or are discarded into landfill. But he added the enzymes could one day possibly be sprayed directly onto landfill sites or even infused into sea plants in order to degrade plastic already in the environment. Polyethlylene is the most common plastic in the world and is primaril…								THE global plastic bag pollution crisis could be solved by a waxworm capable of eating through the material at "uniquely high speeds", scientists have announced. Researchers have described the tiny caterpillar's ability to break down even the toughest plastics as "extremely exciting" and said the discovery could be engineered into an environmentally-friendly solution on an industrial scale. "If a…								THE global plastic bag pollution crisis could be solved by a waxworm capable of eating through the material at "uniquely high speeds", scientists have announced.	THE global plastic bag pollution crisis could be solved by a waxworm capable of eating through the material at "uniquely high speeds", scientists have announced.							THE global plastic bag pollution crisis could be solved by a waxworm capable of eating through the material at "uniquely high speeds", scientists have announced. "It's extremely, extremely exciting because breaking down plastic has proved so challenging," said Paolo Bombelli from Cambridge University.				"If a single enzyme is responsible for this chemical process, its reproduction on a large scale using biotechnological methods should be achievable." But he added the enzymes could one day possibly be sprayed directly onto landfill sites or even infused into sea plants in order to degrade plastic already in the environment.		The waxworm's potential was discovered by accident when biologist and amateur beekeeper Federica Bertocchini cleaned out her hives and temporarily placed the parasites in a plastic shopping bag. She soon noticed it had become riddled with holes. To confirm it was not just the caterpillars' chewing mechanism that was degrading the plastic, researchers "mashed up" some of the worms and smeared them…			"It's extremely, extremely exciting because breaking down plastic has proved so challenging," said Paolo Bombelli from Cambridge University.
NA	6	6.60	345				Caterpillars might hold the key to Earth’s plastic pollution problem. But not the kind that turn into butterflies — the kind that are a parasite to bees. The larva of a common insect can break down the chemical bonds in a plastic bag, when it’s not busy eating beeswax, so it could give scientists an answer to the immense plastic buildup that threatens the environment. Plastic, and plastic bags in…																	Caterpillars might hold the key to Earth’s plastic pollution problem. But not the kind that turn into butterflies — the kind that are a parasite to bees. The larva of a common insect can break down the chemical bonds in a plastic bag, when it’s not busy eating beeswax, so it could give scientists an answer to the immense plastic buildup that threatens the environment. “If a single enzyme is respo…								Caterpillars might hold the key to Earth’s plastic pollution problem. But not the kind that turn into butterflies — the kind that are a parasite to bees. The larva of a common insect can break down the chemical bonds in a plastic bag, when it’s not busy eating beeswax, so it could give scientists an answer to the immense plastic buildup that threatens the environment.	Caterpillars might hold the key to Earth’s plastic pollution problem. But not the kind that turn into butterflies — the kind that are a parasite to bees. The larva of a common insect can break down the chemical bonds in a plastic bag, when it’s not busy eating beeswax, so it could give scientists an answer to the immense plastic buildup that threatens the environment.	Caterpillars might hold the key to Earth’s plastic pollution problem.					“Given the fast rate of biodegradation reported here, these findings have potential for significant biotechnological applications,” the authors wrote. “If a single enzyme is responsible for this chemical process, its reproduction on a large scale using biotechnological methods should be achievable,” first author Paolo Bombelli, from Cambridge, said in the statement. “This discovery could be an im…					“If a single enzyme is responsible for this chemical process, its reproduction on a large scale using biotechnological methods should be achievable,” first author Paolo Bombelli, from Cambridge, said in the statement. “This discovery could be an important tool for helping to get rid of the polyethylene plastic waste accumulated in landfill sites and oceans.”		“If a single enzyme is responsible for this chemical process, its reproduction on a large scale using biotechnological methods should be achievable,” first author Paolo Bombelli, from Cambridge, said in the statement. “This discovery could be an important tool for helping to get rid of the polyethylene plastic waste accumulated in landfill sites and oceans.”
NA	6	6.22	567				Up to 38% of discarded plastic in Europe is buried in landfill sites. In the oceans, plastic waste breaks down into small particles which pose a serious health risk to the fish that ingest them.																	A moth that prefers plastic to pullovers could help solve the problem of discarded shopping bags and packaging, researchers believe. Dr Paolo Bombelli, a member of the international team from Cambridge University, said: "If a single enzyme is responsible for this chemical process, its reproduction on a large scale using biotechnological methods should be achievable. "This discovery could be an im…								A moth that prefers plastic to pullovers could help solve the problem of discarded shopping bags and packaging, researchers believe.	A moth that prefers plastic to pullovers could help solve the problem of discarded shopping bags and packaging, researchers believe.						A moth that prefers plastic to pullovers could help solve the problem of discarded shopping bags and packaging, researchers believe.					Dr Paolo Bombelli, a member of the international team from Cambridge University, said: "If a single enzyme is responsible for this chemical process, its reproduction on a large scale using biotechnological methods should be achievable. "This discovery could be an important tool for helping to get rid of the polyethylene plastic waste accumulated in landfill sites and oceans."		The larvae of the greater wax moth normally thrive on beeswax, making them a hated enemy of bee keepers across Europe. Dr Paolo Bombelli, a member of the international team from Cambridge University, said: "If a single enzyme is responsible for this chemical process, its reproduction on a large scale using biotechnological methods should be achievable. Dr Federica Bertocchini, from the Institute …			Dr Bertocchini said: "Plastic is a global problem. Nowadays waste can be found everywhere, including in rivers and oceans. "Polyethylene in particular is very resistant, and as such is very difficult to degrade naturally."
NA	6	6.23	323																					Amoth that prefers plastic to pullovers could help solve the problem of discardedshopping bags and packaging, researchers believe. Dr Paolo Bombelli, a member of the international team fromCambridge University, said: "If a single enzyme is responsible for this chemical process, its reproduction on a large scale using biotechnological methods should be achievable. "This discovery could be an impor…								Amoth that prefers plastic to pullovers could help solve the problem of discardedshopping bags and packaging, researchers believe.	Amoth that prefers plastic to pullovers could help solve the problem of discardedshopping bags and packaging, researchers believe.	Amoth that prefers plastic to pullovers could help solve the problem of discardedshopping bags and packaging, researchers believe. Placed in a plastic bag the grubs quickly leave it riddled with holes, in much the same way that a woollen jumper is attacked by clothes moth caterpillars.					Amoth that prefers plastic to pullovers could help solve the problem of discardedshopping bags and packaging, researchers believe.					Dr Paolo Bombelli, a member of the international team fromCambridge University, said: "If a single enzyme is responsible for this chemical process, its reproduction on a large scale using biotechnological methods should be achievable. "This discovery could be an important tool for helping to get rid of the polyethylene plastic waste accumulated in landfill sites and oceans."		The larvae of the greater wax moth normally thrive on beeswax, making them a hated enemy of bee keepers across Europe. Understanding how the larvae eat plastic could provide a biotechnological method of disposing of bags and packaging, a major source of land and sea pollution, say scientists. Dr Paolo Bombelli, a member of the international team fromCambridge University, said: "If a single enzyme…
NA	6	6.29	410																					If scientists can recreate the way the larvae eat through the plastic, they could come up with a new way of disposing of bags and packaging which take decades to degrade naturally. Dr Paolo Bombelli, a member of the international team from Cambridge University, said: 'If a single enzyme is responsible for this chemical process, its reproduction on a large scale should be achievable.				They taste like a mix of pine nuts and Japanese enoki mushrooms and were said to be suitable for human consumption in a US government report. When fried, they explode like popcorn.					Scientists have found a moth larva known as a 'wax worm' that loves to munch on plastic bags, a major source of land and sea pollution.	IF you think moths are just pests that leave holes in your woolly jumpers, think again - they could come to humanity's rescue. When fried, they explode like popcorn.					Dr Bombelli said the larvae produce 'something that breaks the chemical bond, perhaps in its salivary glands or a symbiotic bacteria in its gut. The next steps for us will be to try to identify the molecular processes in this reaction and see if we can isolate the enzyme responsible.' The larvae of the greater wax moth (galleria mellonella) are used by anglers as bait, and by bird and lizard keep…					If scientists can recreate the way the larvae eat through the plastic, they could come up with a new way of disposing of bags and packaging which take decades to degrade naturally. Dr Paolo Bombelli, a member of the international team from Cambridge University, said: 'If a single enzyme is responsible for this chemical process, its reproduction on a large scale should be achievable.		Scientists have found a moth larva known as a 'wax worm' that loves to munch on plastic bags, a major source of land and sea pollution. The greater wax moth normally eats beeswax, making them feared by beekeepers across Europe. The larvae of the greater wax moth (galleria mellonella) are used by anglers as bait, and by bird and lizard keepers as feed.
NA	6	6.34	198																					Scientists have stumbled on a natural disposal technique for trillions of plastic bags, after accidentally discovering that a common worm can ingest polythene. Researchers believe an enzyme produced by the insect breaks down the plastic, which has similar chemical bonds to the beeswax in which the worms hatch and grow. "The next step is to isolate and produce this enzyme on an industrial scale," …								Scientists have stumbled on a natural disposal technique for trillions of plastic bags, after accidentally discovering that a common worm can ingest polythene.	Scientists have stumbled on a natural disposal technique for trillions of plastic bags, after accidentally discovering that a common worm can ingest polythene.	Scientists have stumbled on a natural disposal technique for trillions of plastic bags, after accidentally discovering that a common worm can ingest polythene. The study was sparked by Dr Bertocchini's accidental discovery that plastic bags were no match for moth larvae.						Scientists have stumbled on a natural disposal technique for trillions of plastic bags, after accidentally discovering that a common worm can ingest polythene.				Researchers believe an enzyme produced by the insect breaks down the plastic, which has similar chemical bonds to the beeswax in which the worms hatch and grow. "The next step is to isolate and produce this enzyme on an industrial scale," said co-author Federica Bertocchini, an evolutionary biologist with the University of Cantabria.		British and Spanish researchers found the wax worm, a scourge of beehives worldwide, can chemically transform non-biodegradable plastic into an organic compound.
NA	6	6.21	633													Polyethylene is largely used in packaging, and accounts for 40% of total demand for plastic products across Europe - where up to 38% of plastic is discarded in landfills. People around the world use around a trillion plastic bags every year.								Scientists from the University of Cambridge and Spain say the discovery could lead to a biotechnological approach to polyethylene waste that chokes oceans and landfills. Plastic is usually highly resistant to breaking down, but nature may provide the answer. 'This discovery could be an important tool for helping to get rid of the polyethylene plastic waste accumulated in landfill sites and oceans…								India, April 25 -- The humble caterpillar can be the answer to dealing with thegrowing mountains of plastic waste around the world, according to new research that shows it breaks down chemical bonds in plastic used for bags and packaging at unusually high speeds.	Scientists from the University of Cambridge and Spain say the discovery could lead to a biotechnological approach to polyethylene waste that chokes oceans and landfills. Plastic is usually highly resistant to breaking down, but nature may provide the answer.	India, April 25 -- The humble caterpillar can be the answer to dealing with thegrowing mountains of plastic waste around the world, according to new research that shows it breaks down chemical bonds in plastic used for bags and packaging at unusually high speeds. Wax is a polymer, a sort of 'natural plastic', and has a chemical structure not dissimilar to polyethylene," said Bertocchini, the stud…					To confirm it wasn't just the chewing mechanism of the caterpillars degrading the plastic, the team mashed up some of the worms and smeared them on polyethylene bags, with similar results. "The caterpillars are not just eating the plastic without modifying its chemical make-up. We showed that the polymer chains in polyethylene plastic are actually broken by the wax worms," said Bombelli.					'This discovery could be an important tool for helping to get rid of the polyethylene plastic waste accumulated in landfill sites and oceans.'		Scientists from the University of Cambridge and Spain say the discovery could lead to a biotechnological approach to polyethylene waste that chokes oceans and landfills. Plastic is usually highly resistant to breaking down, but nature may provide the answer. The chance discovery occurred when a member of the scientific team, Federica Bertocchini, an amateur bee-keeper, was removing the parasitic …
NA	6	6.19	465																					THE global plastic bag crisis could be solved by a waxworm capable of eating through the material at "uniquely high speeds", scientists have announced. Researchers have described the tiny caterpillar's ability to break down even the toughest plastics as "extremely exciting" and said the discovery could offer an environmentally friendly solution on an industrial scale. Dr Bertocchini, who led the …								THE global plastic bag crisis could be solved by a waxworm capable of eating through the material at "uniquely high speeds", scientists have announced.	THE global plastic bag crisis could be solved by a waxworm capable of eating through the material at "uniquely high speeds", scientists have announced.							THE global plastic bag crisis could be solved by a waxworm capable of eating through the material at "uniquely high speeds", scientists have announced. Researchers have described the tiny caterpillar's ability to break down even the toughest plastics as "extremely exciting" and said the discovery could offer an environmentally friendly solution on an industrial scale. The waxworm, commonly found …				"If a single enzyme is responsible for this chemical process, its reproduction on a large scale using biotechnological methods should be achievable." He said the most likely scenario was one whereby existing recycling plants could be adapted to biodegrade mass quantities of plastic using the enzyme. Dr Bertocchini, who led the research at the Institute of Biomedicine and Biotechnology of Cantabri…		THE global plastic bag crisis could be solved by a waxworm capable of eating through the material at "uniquely high speeds", scientists have announced. The waxworm's potential was discovered when Federica Bertocchini, a biologist and amateur beekeeper, cleaned out her hives and temporarily placed the parasites in a plastic bag.			"It's extremely, extremely exciting because breaking down plastic has proved so challenging," said Paolo Bombelli from Cambridge University.
NA	6	6.5	475																					London: A commercially bred caterpillar can quickly break down polythene bags and may help get rid of the plastic waste accumulating in landfill sites and oceans, scientists say. The degradation rate is extremely fast compared to other recent discoveries, such as bacteria reported to biodegrade some plastics at a rate of just 0.13 mg a day, researchers said. "If a single enzyme is responsible for…								London: A commercially bred caterpillar can quickly break down polythene bags and may help get rid of the plastic waste accumulating in landfill sites and oceans, scientists say.	London: A commercially bred caterpillar can quickly break down polythene bags and may help get rid of the plastic waste accumulating in landfill sites and oceans, scientists say.						"This discovery could be an important tool for helping to get rid of the polyethylene plastic waste accumulated in landfill sites and oceans," he said. The study was published in the journal Current Biology.					"This discovery could be an important tool for helping to get rid of the polyethylene plastic waste accumulated in landfill sites and oceans," he said. The study was published in the journal Current Biology.
NA	6	6110	355																					Washington: A caterpillar, commonly known as a waxworm, can help make plastic pollution a history, according to a recent study. “We are planning to implement this finding into a viable way to get rid of plastic waste, working towards a solution to save our oceans, rivers, and all the environment from the unavoidable consequences of plastic accumulation,” Bertocchini noted.								Washington: A caterpillar, commonly known as a waxworm, can help make plastic pollution a history, according to a recent study.	Bertocchini and her colleagues made the discovery quite by accident, after noticing that plastic bags containing wax worms quickly became riddled with holes. Further study showed that the worms can do damage to a plastic bag in less than an hour.	Washington: A caterpillar, commonly known as a waxworm, can help make plastic pollution a history, according to a recent study. “Wax is a polymer, a sort of ‘natural plastic,’ and has a chemical structure not dissimilar to polyethylene,” Bertocchini says.						Washington: A caterpillar, commonly known as a waxworm, can help make plastic pollution a history, according to a recent study. “However,” she added, “we should not feel justified to dump polyethylene deliberately in our environment just because we now know how to bio-degrade it.” The study appears in the journal Current Biology. (ANI)				“We are planning to implement this finding into a viable way to get rid of plastic waste, working towards a solution to save our oceans, rivers, and all the environment from the unavoidable consequences of plastic accumulation,” Bertocchini noted.		“We have found that the larva of a common insect, Galleria mellonella, is able to biodegrade one of the toughest, most resilient, and most used plastics: polyethylene,” said Federica Bertocchini of the Institute of Biomedicine and Biotechnology of Cantabria in Spain.			“We have found that the larva of a common insect, Galleria mellonella, is able to biodegrade one of the toughest, most resilient, and most used plastics: polyethylene,” said Federica Bertocchini of the Institute of Biomedicine and Biotechnology of Cantabria in Spain. “However,” she added, “we should not feel justified to dump polyethylene deliberately in our environment just because we now know h…
NA	6	6.33	129																					A SCIENTIST has found a solution to the scourge of plastic bags - a caterpillar that eats them.								A SCIENTIST has found a solution to the scourge of plastic bags - a caterpillar that eats them.	A SCIENTIST has found a solution to the scourge of plastic bags - a caterpillar that eats them.						A SCIENTIST has found a solution to the scourge of plastic bags - a caterpillar that eats them.					A SCIENTIST has found a solution to the scourge of plastic bags - a caterpillar that eats them.
PR	6	6.Caterpillar found to eat shopping bags, sugge	665				Generally speaking, plastic is highly resistant to breaking down, and even when it does the smaller pieces choke up ecosystems without degrading. The environmental toll is a heavy one.									Polyethylene is largely used in packaging, and accounts for 40% of total demand for plastic products across Europe - where up to 38% of plastic is discarded in land~lls. People around the world use around a trillion plastic bags every single year.								"If a single enzyme is responsible for this chemical process, its reproduction on a large scale using biotechnological methods should be achievable," said Cambridge's Paolo Bombelli, ~rst author of the study published today in the journal Current Biology. "This discovery could be an important tool for helping to get rid of the polyethylene plastic waste accumulated in land~ll sites and oceans." A…				Scientists say that the degradation rate is extremely fast compared to other recent discoveries, such as bacteria reported last year to biodegrade some plastics at a rate of just 0.1 3mg a day.				Scientists have found that a caterpillar commercially bred for ~shing bait has the ability to biodegrade polyethylene: one of the toughest and most used plastics, frequently found clogging up land~ll sites in the form of plastic shopping bags.	Scientists have found that a caterpillar commercially bred for ~shing bait has the ability to biodegrade polyethylene: one of the toughest and most used plastics, frequently found clogging up land~ll sites in the form of plastic shopping bags.						Scientists say that the degradation rate is extremely fast compared to other recent discoveries, such as bacteria reported last year to biodegrade some plastics at a rate of just 0.1 3mg a day. "If a single enzyme is responsible for this chemical process, its reproduction on a large scale using biotechnological methods should be achievable," said Cambridge's Paolo Bombelli, ~rst author of the stu…					Added Bertocchini: "We are planning to implement this ~nding into a viable way to get rid of plastic waste, working towards a solution to save our oceans, rivers, and all the environment from the unavoidable consequences of plastic accumulation."		A chance discovery occurred when one of the scienti~c team, Federica Bertocchini, an amateur beekeeper, was removing the parasitic pests from the honeycombs in her hives. The worms were temporarily kept in a typical plastic shopping bag that became riddled with holes. Bertocchini, from the Institute of Biomedicine and Biotechnology of Cantabria (CSIC), Spain, collaborated with colleagues Paolo Bo…		"If a single enzyme is responsible for this chemical process, its reproduction on a large scale using biotechnological methods should be achievable," said Cambridge's Paolo Bombelli, ~rst author of the study published today in the journal Current Biology. "This discovery could be an important tool for helping to get rid of the polyethylene plastic waste accumulated in land~ll sites and oceans." "…
NA	6	6109	680				Generally speaking, plastic is highly resistant to breaking down, and even when it does the smaller pieces choke up ecosystems without degrading. The environmental toll is a heavy one.																	Washington: As bizarre as it may sound but caterpillars could now help us get rid of plastic pollution! Scientists have found that a caterpillar commercially bred for fishing bait has the ability to biodegrade polyethylene: one of the toughest and most used plastics, frequently found clogging up landfill sites in the form of plastic shopping bags. “If a single enzyme is responsible for this chemi…								Washington: As bizarre as it may sound but caterpillars could now help us get rid of plastic pollution! Scientists have found that a caterpillar commercially bred for fishing bait has the ability to biodegrade polyethylene: one of the toughest and most used plastics, frequently found clogging up landfill sites in the form of plastic shopping bags.	Scientists have found that a caterpillar commercially bred for fishing bait has the ability to biodegrade polyethylene: one of the toughest and most used plastics, frequently found clogging up landfill sites in the form of plastic shopping bags.	Generally speaking, plastic is highly resistant to breaking down, and even when it does the smaller pieces choke up ecosystems without degrading. Yet nature may provide an answer. “Wax is a polymer, a sort of ‘natural plastic,’ and has a chemical structure not dissimilar to polyethylene,” said CSIC’s Bertocchini, the study’s lead author.						Washington: As bizarre as it may sound but caterpillars could now help us get rid of plastic pollution! Scientists say that the degradation rate is extremely fast compared to other recent discoveries, such as bacteria reported last year to biodegrade some plastics at a rate of just 0.13mg a day. Generally speaking, plastic is highly resistant to breaking down, and even when it does the smaller pi…				As the molecular details of the process become known, the researchers say it could be used to devise a biotechnological solution on an industrial scale for managing polyethylene waste. Added Bertocchini: “We are planning to implement this finding into a viable way to get rid of plastic waste, working towards a solution to save our oceans, rivers, and all the environment from the unavoidable conse…		A chance discovery occurred when one of the scientific team, Federica Bertocchini, an amateur beekeeper, was removing the parasitic pests from the honeycombs in her hives. Bertocchini, from the Institute of Biomedicine and Biotechnology of Cantabria (CSIC), Spain, collaborated with colleagues Paolo Bombelli and Christopher Howe at the University of Cambridge’s Department of Biochemistry to conduc…
NA	6	6.18	485																					BRITAIN: The global plastic bag crisis could be solved by a waxworm capable of eating through the material at "uniquely high speeds", scientists have announced. Researchers have described the tiny caterpillar's ability to break down even the toughest plastics as "extremely exciting" and said the discovery could offer an environmentally friendly solution on an industrial scale. "If a single enzyme…								BRITAIN: The global plastic bag crisis could be solved by a waxworm capable of eating through the material at "uniquely high speeds", scientists have announced.	BRITAIN: The global plastic bag crisis could be solved by a waxworm capable of eating through the material at "uniquely high speeds", scientists have announced.							BRITAIN: The global plastic bag crisis could be solved by a waxworm capable of eating through the material at "uniquely high speeds", scientists have announced. Researchers have described the tiny caterpillar's ability to break down even the toughest plastics as "extremely exciting" and said the discovery could offer an environmentally friendly solution on an industrial scale. Around a trillion p…				Bertocchini, who led the research at the Institute of Biomedicine and Biotechnology of Cantabria, said: "We are planning to implement this finding into a viable way to get rid of plastic waste, working towards a solution to save our oceans, rivers, and all the environment from the unavoidable consequences of plastic accumulation."		Researchers have described the tiny caterpillar's ability to break down even the toughest plastics as "extremely exciting" and said the discovery could offer an environmentally friendly solution on an industrial scale. The waxworm's potential was discovered when Federica Bertocchini, a biologist and amateur beekeeper, cleaned out her hives and temporarily placed the parasites in a plastic bag.			"It's extremely, extremely exciting because breaking down plastic has proved so challenging," said Paolo Bombelli from Cambridge University.
NA	6	6.36	80																					Moth bags a key bio role MOTHS could be key to disposing of discarded shopping bags and packaging, say researchers. Dr Paolo Bombelli, of Cambridge University, said it might be possible to reproduce the chemical responsible "on a large scale". He said this could help destroy accumulated plastic in landfills and seas.								Moth bags a key bio role MOTHS could be key to disposing of discarded shopping bags and packaging, say researchers.	Moth bags a key bio role MOTHS could be key to disposing of discarded shopping bags and packaging, say researchers.						Dr Paolo Bombelli, of Cambridge University, said it might be possible to reproduce the chemical responsible "on a large scale". He said this could help destroy accumulated plastic in landfills and seas.					Dr Paolo Bombelli, of Cambridge University, said it might be possible to reproduce the chemical responsible "on a large scale". He said this could help destroy accumulated plastic in landfills and seas.
NA	6	6.6	570																					This discovery could be an important tool for helping to get rid of the polyethylene plastic waste accumulated in landfill sites and oceans, said Cambridge University professor Paolo Bombelli, co-author of a study published in the journal Current Biology. Manufactured on a large scale, the plastic-degrading substance would, in theory, take the form of an environmentally harmless liquid that could…								More commonly used as bait, a small caterpillar joins the fight against plastic pollution A MOTH caterpillar commonly bred to provide fish bait feasts on a notoriously resistant plastic, scientists reported Monday, raising hopes the creature can help manage the global problem of plastic-bag pollution.	More commonly used as bait, a small caterpillar joins the fight against plastic pollution A MOTH caterpillar commonly bred to provide fish bait feasts on a notoriously resistant plastic, scientists reported Monday, raising hopes the creature can help manage the global problem of plastic-bag pollution. This discovery could be an important tool for helping to get rid of the polyethylene plastic was…	More commonly used as bait, a small caterpillar joins the fight against plastic pollution A MOTH caterpillar commonly bred to provide fish bait feasts on a notoriously resistant plastic, scientists reported Monday, raising hopes the creature can help manage the global problem of plastic-bag pollution. The answer may lay in the worms habitat and eating habits. Growing in bee colonies, the moth lar…					Manufactured on a large scale, the plastic-degrading substance would, in theory, take the form of an environmentally harmless liquid that could be used in plastic treatment facilities.					Manufactured on a large scale, the plastic-degrading substance would, in theory, take the form of an environmentally harmless liquid that could be used in plastic treatment facilities.					Bertocchini keeps beehives as a hobby. When I went to clean them for reuse in the spring, they were infested with (wax) worms, the researcher says. So I put them in a bag. Then, after a while, I saw the bag was full of holes and these caterpillars were crawling all around my place. The answer may lay in the worms habitat and eating habits. Growing in bee colonies, the moth larvae feed on beeswax,…
NA	6	6116	241																					The researchers believe that the findings, published in the journal Current Biology could help devise a biotechnological solution to managing polyethylene waste.								London, April 25 (IANS) A solution to the global problem of plastic waste is in sight as researchers have discovered that the larva of wax worm has the ability to degrade plastic -- which is incredibly resistant to breaking down.	London, April 25 (IANS) A solution to the global problem of plastic waste is in sight as researchers have discovered that the larva of wax worm has the ability to degrade plastic -- which is incredibly resistant to breaking down.						The researchers said the molecular details of wax biodegradation require further investigation, but it is likely that digesting beeswax and polyethylene involves breaking down similar types of chemical bonds. "Wax is a polymer, a sort of 'natural plastic,' and has a chemical structure not dissimilar to polyethylene," Bertocchini said. Bertocchini and her colleagues made the discovery quite by acc…					The researchers believe that the findings, published in the journal Current Biology could help devise a biotechnological solution to managing polyethylene waste.		London, April 25 (IANS) A solution to the global problem of plastic waste is in sight as researchers have discovered that the larva of wax worm has the ability to degrade plastic -- which is incredibly resistant to breaking down. The researchers believe that the findings, published in the journal Current Biology could help devise a biotechnological solution to managing polyethylene waste.			"We have found that the larva of a common insect, Galleria mellonella, is able to biodegrade one of the toughest, most resilient, and most used plastics: polyethylene," said Federica Bertocchini of the Institute of Biomedicine and Biotechnology of Cantabria in Spain.
NA	6	6.35	329				Millions of tons of plastic bags end up onlandfill sitesevery year, risking the health of the environment and destroying thenatural habitat of certain animals.																	Professor Bombelli said: "If a single enzyme is responsible for this chemical process, its reproduction on a large scale using biotechnological methods should be achievable". "This discovery could be an important tool for helping to get rid of the polyethylene plastic waste accumulated in landfill sites and oceans." The team areplanning to use what they have learned from the worms to finda viable…								Millions of tons of plastic bags end up onlandfill sitesevery year, risking the health of the environment and destroying thenatural habitat of certain animals. But amateur beekeeper Federica Bertocchinihasmade an astounding discoverywhen removingwax worms fromhoneycombs, which she hopes could help solve the problems caused by plastic bags.	Millions of tons of plastic bags end up onlandfill sitesevery year, risking the health of the environment and destroying thenatural habitat of certain animals. But amateur beekeeper Federica Bertocchinihasmade an astounding discoverywhen removingwax worms fromhoneycombs, which she hopes could help solve the problems caused by plastic bags.	One of the reasons the worms can break down plastic at such a quick rate is likely because they're doing it already - when they're digesting beeswax, a sort of "natural plastic" as ProfessorBertocchini calls it, with a chemical structure similar to polyethylene.						Millions of tons of plastic bags end up onlandfill sitesevery year, risking the health of the environment and destroying thenatural habitat of certain animals. But amateur beekeeper Federica Bertocchinihasmade an astounding discoverywhen removingwax worms fromhoneycombs, which she hopes could help solve the problems caused by plastic bags.				The team areplanning to use what they have learned from the worms to finda viable way to get rid of plastic waste to save our "oceans, rivers and the entire environment from the unavoidable consequences of plastic accumulation".		But amateur beekeeper Federica Bertocchinihasmade an astounding discoverywhen removingwax worms fromhoneycombs, which she hopes could help solve the problems caused by plastic bags. ProfessorBertocchini, from the Institute of Biomedicine and Biotechnology of Cantabria (CSIC), Spain, noticed the strange phenomenon, and in collaboration with Paolo Bombelli and Christopher Howefromthe University of …
NA	6	6.7	537												Plastic experts estimate that about 80 million tonnes of polyethylene is produced worldwide every year. India's Central Pollution Control Board had estimated that 60 cities across India in 2010 generated about 3,500 tonnes plastic waste every day, most of which goes into urban landfills.											Plastic experts estimate that about 80 million tonnes of polyethylene is produced worldwide every year. India's Central Pollution Control Board had estimated that 60 cities across India in 2010 generated about 3,500 tonnes plastic waste every day, most of which goes into urban landfills.		Plastic experts estimate that about 80 million tonnes of polyethylene is produced worldwide every year. India's Central Pollution Control Board had estimated that 60 cities across India in 2010 generated about 3,500 tonnes plastic waste every day, most of which goes into urban landfills. Polyethylene takes decades to decompose - low-density polyethylene bags take about 100 years to decompose comp…				April 24: Scientists have discovered that a caterpillar-like wax worm can degrade polyethylene, an observation that they are hoping will lead to novel strategies to manage the world's mountains of plastic garbage that currently go into urban landfills.	April 24: Scientists have discovered that a caterpillar-like wax worm can degrade polyethylene, an observation that they are hoping will lead to novel strategies to manage the world's mountains of plastic garbage that currently go into urban landfills.	April 24: Scientists have discovered that a caterpillar-like wax worm can degrade polyethylene, an observation that they are hoping will lead to novel strategies to manage the world's mountains of plastic garbage that currently go into urban landfills.					"We're excited by what we've seen so far, but the precise molecular mechanism remains a mystery. It is possible the worm works through enzymes or there may even be a bacteria living inside the worm - we don't know," Bombelli told this newspaper. The researchers are hoping to study the worm's genes as part of efforts to identify its plastic-eating machinery.										"This is really fast - when you put the worms in a plastic bag, they just chew their way out in 20 minutes," Bertocchini told The Telegraph in a telephone interview. "We still don't understand how they do it. It is possible they have a special enzyme of several enzymes that break down the polyethylene's chemical bonds." One key component of the research was to determine whether the worms were jus…
NA	8	8.1		1	SCIENTISTS in the South West fear microplastics in the oceans could transport bacteria and viruses into the food chain, affecting humans. A particular concern is how the fragments affect filter-feeders such as oysters and mussels, which are then eaten by humans.	A new study, by the University of Exeter and the Centre for Environment, Fisheries and Aquaculture Science says critical questions remain about the role of microplastics in carrying pathogens, and possible threats to food production and safety. The paper focuses on aquaculture - seafood farming - which is expected to play a vital role in feeding the world's growing population, and already faces c…	A particular concern is how the fragments affect filter-feeders such as oysters and mussels, which are then eaten by humans.									Dr Lewis added: "It's likely that any negative impacts will get worse if we continue to dump plastic into the oceans at the current rate."																SCIENTISTS in the South West fear microplastics in the oceans could transport bacteria and viruses into the food chain, affecting humans.	SCIENTISTS in the South West fear microplastics in the oceans could transport bacteria and viruses into the food chain, affecting humans.				Dr Lewis added: "It's likely that any negative impacts will get worse if we continue to dump plastic into the oceans at the current rate."					"Disease is one of the biggest issues faced by the industry."							Dr Lewis added: "It's likely that any negative impacts will get worse if we continue to dump plastic into the oceans at the current rate."
NA	8	8.3			A new study by the University of Exeter and the Centre for Environmental, Fisheries and Aquaculture (Cefas) Sciences in the United Kingdom, investigating the risk of diseases arising from ocean plastics, reveals that there are still fundamental questions about the role of microplastics in pathogen transmission and potential threats to food production and safety.	A new study by the University of Exeter and the Centre for Environmental, Fisheries and Aquaculture (Cefas) Sciences in the United Kingdom, investigating the risk of diseases arising from ocean plastics, reveals that there are still fundamental questions about the role of microplastics in pathogen transmission and potential threats to food production and safety. However, bivalves are fed by filtr…	A new study by the University of Exeter and the Centre for Environmental, Fisheries and Aquaculture (Cefas) Sciences in the United Kingdom, investigating the risk of diseases arising from ocean plastics, reveals that there are still fundamental questions about the role of microplastics in pathogen transmission and potential threats to food production and safety.																					"One study found antimicrobial-resistant bacteria at concentrations of 100 to 5,000 times higher on microplastic surfaces than in surrounding seawater," he continues--. However, the effects of all this on marine animals, aquaculture and, ultimately, human health are really unknown right now." Many studies have suggested that the transfer of plastic diseases to the organisms they ingest may occur,…				A new study by the University of Exeter and the Centre for Environmental, Fisheries and Aquaculture (Cefas) Sciences in the United Kingdom, investigating the risk of diseases arising from ocean plastics, reveals that there are still fundamental questions about the role of microplastics in pathogen transmission and potential threats to food production and safety.	"The fragments of microplastics differ markedly from natural floating particles, and there is growing evidence that they represent a potential reservoir of pathogens," says Ceri Lewis of the Exeter Global Systems Institute--. Of particular concern are the growing reports of the presence of numerous pathogens on the plastic surfaces of the world's oceans."			With millions of tons of plastic reaching the world's oceans every year, and trillions of particles floating on the surface, the potential impacts of plastic pollution are enormous. Plastic particles are known to carry specific combinations of metals, contaminants and pathogens (bacteria, viruses, and other disease-causing microorganisms).						However, bivalves are fed by filtration and are known to absorb microplastic particles from seawater. "Understanding any risk of pathogen transport associated with microplastics is important to the aquaculture industry," says lead author Jake Bowley of the University of Exeter--. The disease is one of the biggest problems facing the industry."				"The fragments of microplastics differ markedly from natural floating particles, and there is growing evidence that they represent a potential reservoir of pathogens," says Ceri Lewis of the Exeter Global Systems Institute--. Of particular concern are the growing reports of the presence of numerous pathogens on the plastic surfaces of the world's oceans." Dr. Craig Baker-Austin of Cephas adds tha…
NA	8	8.4			This transfer of pathogens from plastic to marine life could wipe out mollusc populations in some regions, or even pass pathogens to human seafood fans. Microplastics have been discovered inside every single sample of seafood bought at a market as part of a scientific study.	•Knowledge gaps still exist over how microplastics carry these pathogens to fish Plastic pollution in our oceans could spread fatal diseases into the food chain through farmed seafoods such as mussels and oysters, scientists warn. The new study focuses on implications for the aquaculture industry - the breeding, rearing and harvesting of fish, shellfish and other marine organisms. Aquaculture is …	Molluscs such as mussels and oysters have a filter feeding system that makes them very susceptible to ingesting these contaminated plastic bits. This transfer of pathogens from plastic to marine life could wipe out mollusc populations in some regions, or even pass pathogens to human seafood fans.									It's one of many emerging risks we must consider as a result of human impact on the ocean and highlights the connection between ocean risks and public health and safety.'												Microplastics have been discovered inside every single sample of seafood bought at a market as part of a scientific study. A previous study found antimicrobial-resistant bacteria at concentrations between 100 to 5,000 times higher on microplastic surfaces than in surrounding seawater. And previous research has also found a greater richness of microorganisms that have anti-microbial genes on plast…				•Pathogens can contaminate our favourite seafood including oysters and mussels •Knowledge gaps still exist over how microplastics carry these pathogens to fish Plastic pollution in our oceans could spread fatal diseases into the food chain through farmed seafoods such as mussels and oysters, scientists warn.	•Pathogens can contaminate our favourite seafood including oysters and mussels •Knowledge gaps still exist over how microplastics carry these pathogens to fish Plastic pollution in our oceans could spread fatal diseases into the food chain through farmed seafoods such as mussels and oysters, scientists warn.	According to the UN, there are as many as 51 trillion microplastic particles in the seas, 500 times more than stars in our galaxy.			•Knowledge gaps still exist over how microplastics carry these pathogens to fish Plastic pollution in our oceans could spread fatal diseases into the food chain through farmed seafoods such as mussels and oysters, scientists warn.								•Knowledge gaps still exist over how microplastics carry these pathogens to fish Plastic pollution in our oceans could spread fatal diseases into the food chain through farmed seafoods such as mussels and oysters, scientists warn.	According to the UN, there are as many as 51 trillion microplastic particles in the seas, 500 times more than stars in our galaxy. 'Understanding the link between microplastics and the risk of transferring pathogens through shellfish is critical to our work to manage and transfer risk for the aquaculture industry,' said Geir Myre, global head of aquaculture insurance firm AXA XL. 'It's one of man…			'There are a number of papers that have discovered potentially pathogenic bacteria in much higher numbers on microplastics than on natural particles, yet other studies have found no real difference between the numbers of potential pathogens between plastic and natural particles,' Dr Lewis told MailOnline. 'It is what else is sorbed onto the plastic particle and its chemical makeup compared with n…
NA	8	8.5			Scientists have found microplastics inside shellfish, and they know ocean plastic is coated in pathogens like E.coli and vibriosis, which cause nausea, diarrhoea and stomach cramps. But it is not clear whether seafood can catch the diseases from the plastic and pass it on to humans.	"We really want to understand whether this is going to be a potential risk to the food sector, so that if it is we can start doing something about it," Dr Ceri Lewis, from the University of Exeter, told i.	A team from the University of Exeter and the Centre for Environment, Fisheries and Aquaculture Science have joined forces in a three-year project to investigate whether shellfish such as mussels and oysters are getting sick from eating plastic coated in dangerous viruses and bacteria. Scientists have found microplastics inside shellfish, and they know ocean plastic is coated in pathogens like E.c…																									Microplastics in the ocean carry harmful diseases that may be entering the food chain, scientists fear.	Microplastics in the ocean carry harmful diseases that may be entering the food chain, scientists fear.				Microplastics in the ocean carry harmful diseases that may be entering the food chain, scientists fear.									Microplastics in the ocean carry harmful diseases that may be entering the food chain, scientists fear.			"We really want to understand whether this is going to be a potential risk to the food sector, so that if it is we can start doing something about it," Dr Ceri Lewis, from the University of Exeter, told i.
NA	8	8.6																										Dr Ceri Lewis, of Exeter's Global Systems Institute, said: "Of particular concern are increasing reports of the presence of numerous pathogens on plastic surfaces in oceans. One study found antimicrobial-resistant bacteria at concentrations 100 to 5,000 times higher on microplastic surfaces than in surrounding seawater."				Plastic pollution in our oceans could spread fatal diseases into the food chain through farmed seafoods such as mussels and oysters, warns a new study.	Now experts say "critical" questions over disease risks need to be answered.				Fears were raised when recent research found antimicrobial-resistant bacteria at concentrations up to 5,000 times higher on microplastic surfaces than in surrounding seawater. Dr Ceri Lewis, of Exeter's Global Systems Institute, said: "Of particular concern are increasing reports of the presence of numerous pathogens on plastic surfaces in oceans. One study found antimicrobial-resistant bacteria …									Now experts say "critical" questions over disease risks need to be answered.
NA	8	8.7		1	PLASTIC pollution in the oceans could spread fatal diseases into the food chain through farmed seafoods such as mussels and oysters.	"Disease is one of the biggest issues faced by the industry."																										Deze is niet gecodeerd omdat het persbericht niet direct zegt dat de informatie uit wetenschappelijk onderzoek komt. Het nieuwsartikel is echter niet verhalend.	Jake Bowley, who led a recent study, said: "Understanding any risk of pathogen transport associated with microplastic is important for the aquaculture industry.				PLASTIC pollution in the oceans could spread fatal diseases into the food chain through farmed seafoods such as mussels and oysters.					"Disease is one of the biggest issues faced by the industry."				Jake Bowley, who led a recent study, said: "Understanding any risk of pathogen transport associated with microplastic is important for the aquaculture industry. "Disease is one of the biggest issues faced by the industry."
PR	8	8.'Critical' questions over disease risks from			But the new study, by the University of Exeter and the Centre for Environment, Fisheries and Aquaculture Science (Cefas), says critical questions remain about the role of microplastics in carrying pathogens, and possible threats to food production and safety.	The paper focusses on aquaculture (seafood farming), which is expected to play a vital role in feeding the world's growing population, and already faces challenges due to diseases. "Disease is one of the biggest issues faced by the industry.	"Some vibrio bacteria are known to contribute to disease in bivalves, often causing mass mortality among larvae and in some cases mortality within adult bivalve populations."									"I t's one of many emerging risks we must consider as a result of human impact on the ocean and highlights the connection between ocean risks and public health and safety."							"We urgently need to move to more sustainable and circular economy approaches to our use of plastic materials to drastically reduce the input of plastics into the environment."					"One study found antimicrobial-resistant bacteria at concentrations 1 00-5,000 times higher on microplastic surfaces than in surrounding seawater.				Key knowledge gaps exist in our understanding of how ocean microplastics transport bacteria and viruses - and whether this a~ects the health of humans and animals, researchers say.	Key knowledge gaps exist in our understanding of how ocean microplastics transport bacteria and viruses - and whether this a~ects the health of humans and animals, researchers say.				"However, it's likely that any negative impacts will get worse if we continue to dump plastic into the oceans at the current rate.					The paper focusses on aquaculture (seafood farming), which is expected to play a vital role in feeding the world's growing population, and already faces challenges due to diseases. "Disease is one of the biggest issues faced by the industry.				Key knowledge gaps exist in our understanding of how ocean microplastics transport bacteria and viruses - and whether this a~ects the health of humans and animals, researchers say.		"Microplastic fragments di~er markedly from natural ~oating particles, and there is growing evidence that they represent a potential reservoir of pathogens," said Dr Ceri Lewis, of Exeter's Global Systems Institute. "Of particular concern are the increasing reports of the presence of numerous pathogens on plastic surfaces in oceans around the world. "One study found antimicrobial-resistant bacter…
NA	11	11.1	354																	-There would have to be a 25-40 per cent reduction in plastic production across the 173 countries included in the study				The researchers considered three key strategies to reduce plastic waste, including cutting production and banning products; improving management of plastic waste and continuous cleanups.								It would take a billion people each year to clean up less than half the world's plastic pollution, a new study has found.	Cleaning up just 40% of global plastic pollution would take 1 billion people a year It would take a billion people each year to clean up less than half the world's plastic pollution, a new study has found.			Cleaning up just 40% of global plastic pollution would take 1 billion people a year It would take a billion people each year to clean up less than half the world's plastic pollution, a new study has found. Ecologists from the University of Toronto are warning of the monumental scale of action needed to curb plastic waste entering the world's rivers, lakes and oceans. The research team found that …									Ecologists from the University of Toronto are warning of the monumental scale of action needed to curb plastic waste entering the world's rivers, lakes and oceans.	Ecologists from the University of Toronto are warning of the monumental scale of action needed to curb plastic waste entering the world's rivers, lakes and oceans. Chelsea Rochman, assistant professor in the Department of Ecology & Evolutionary Biology, who was also part of the study added: "The global community must coordinate a fundamental transformation of the plastics economy, one that reduce…
NA	11	11.14	137												New Zealand could be sending nearly 9000 tonnes of plastic into the environment each year by 2030 – and that doesn't include the containers of waste we're shipping overseas. That's according to a new analysis that's found enough plastic to fill two Westpac Trust Stadiums could be flowing into the world's oceans, rivers and lakes every day by the end of the decade, if countries fail to seriously r…									A new study, led by New Zealand researcher Dr Stephanie Borrelle and published in prestigious journal Science, has called for a "fundamental transformation" of the global plastic economy where products would be re-used rather than wasted.		New Zealand could be sending nearly 9000 tonnes of plastic into the environment each year by 2030 – and that doesn't include the containers of waste we're shipping overseas.						New Zealand could be sending nearly 9000 tonnes of plastic into the environment each year by 2030 – and that doesn't include the containers of waste we're shipping overseas. That's according to a new analysis that's found enough plastic to fill two Westpac Trust Stadiums could be flowing into the world's oceans, rivers and lakes every day by the end of the decade, if countries fail to seriously r…	A new study, led by New Zealand researcher Dr Stephanie Borrelle and published in prestigious journal Science, has called for a "fundamental transformation" of the global plastic economy where products would be re-used rather than wasted.	That's according to a new analysis that's found enough plastic to fill two Westpac Trust Stadiums could be flowing into the world's oceans, rivers and lakes every day by the end of the decade, if countries fail to seriously rein in plastic pollution.			That's according to a new analysis that's found enough plastic to fill two Westpac Trust Stadiums could be flowing into the world's oceans, rivers and lakes every day by the end of the decade, if countries fail to seriously rein in plastic pollution.						New Zealand could be sending nearly 9000 tonnes of plastic into the environment each year by 2030 – and that doesn't include the containers of waste we're shipping overseas.			New Zealand could be sending nearly 9000 tonnes of plastic into the environment each year by 2030 – and that doesn't include the containers of waste we're shipping overseas. A new study, led by New Zealand researcher Dr Stephanie Borrelle and published in prestigious journal Science, has called for a "fundamental transformation" of the global plastic economy where products would be re-used rather…
NA	11	11.15	353				million metric tons by 2030. Pictures of plastic-choked marine life and beaches littered with discarded cola bottles have led to public outcry, and in turn to corporations and governments proposing a slew of pledges to increase recycling.		“The voluntary initiatives and commitments by the industry have failed,” said Nusa Urbancic, campaigns director at the Changing Markets Foundation. “Policymakers should look past the industry smokescreen.”					One case study involved Coca-Cola Co., which Break Free From Plastic has repeatedly named the world’s biggest plastic polluter. The foundation found that the company’s 2009 sustainability report included a commitment to use 25% recycled plastic in its bottles by 2015, while its report for 2015 cited 12.5% recycled or renewable content in its bottles. (Coke didn’t respond to a request for comment.…				and in turn to corporations and governments proposing a slew of pledges to increase recycling. “Policymakers should look past the industry smokescreen.”	and in turn to corporations and governments proposing a slew of pledges to increase recycling.													Environmental degradation According to Bloomberg, the companies who create much of the 23 million metric tons of plastic garbage that reach oceans and rivers each year are failing to staunch the flow of waste and, in some cases, are being misleading about their efforts, according to two new reports.	A group of scientists led by Stephanie B. Borrelle of the University of Toronto developed a model to evaluate the ambitious commitments to curb plastic trash made by countries, international bodies such as the United Nations, and independent groups. The researchers found that even if all these combined pledges are carried out to the letter, plastic pollution will continue to get worse, on an acce…			A group of scientists led by Stephanie B. Borrelle of the University of Toronto developed a model to evaluate the ambitious commitments to curb plastic trash made by countries, international bodies such as the United Nations, and independent groups. The researchers found that even if all these combined pledges are carried out to the letter, plastic pollution will continue to get worse, on an acce…							Environmental degradation According to Bloomberg, the companies who create much of the 23 million metric tons of plastic garbage that reach oceans and rivers each year are failing to staunch the flow of waste and, in some cases, are being misleading about their efforts, according to two new reports. One case study involved Coca-Cola Co., which Break Free From Plastic has repeatedly named the worl…			According to Bloomberg, the companies who create much of the 23 million metric tons of plastic garbage that reach oceans and rivers each year are failing to staunch the flow of waste and, in some cases, are being misleading about their efforts, according to two new reports. A group of scientists led by Stephanie B. Borrelle of the University of Toronto developed a model to evaluate the ambitious …			“Without major technological innovation, it is inconceivable that efforts to recover plastic waste from the environment could reach even 10% of annual emissions,” the researchers said in their report, published on Thursday in the journal Science.
NA	11	11.2	1147				Researchers found that in all surface water sampled, some chemicals were present and either being consumed or absorbed by local aquatic life.		'It is time for the government to face up to the fact that international and UK targets meant to protect nature have failed - only legally binding targets and transparent, properly funded monitoring will lead to real change for nature.'					Leighton Moss in Morecambe Bay is also badly damaged by water pollution, especially through run-off from dairy farms upstream.				This will occur, she said, 'even if governments around the world meet their ambitious global commitments, and other countries join those efforts to curb plastic pollution.'		This will occur, she said, 'even if governments around the world meet their ambitious global commitments, and other countries join those efforts to curb plastic pollution.'			The researchers added that the world must act now to support a focus on recycling - rather than creating more plastic that will pollute the Earth's rivers and oceans. Ministers have admitted the report makes for uncomfortable reading, and have revealed a need for urgent action. 'Urgent investment is needed now to turn our suffering waters into thriving blue corridors for wildlife.'	•We must focus on recycling plastic, rather than producing more, the team said Even if world nations meet their environmental commitments, a staggering 53 million tonnes of plastic will enter the world's waters annually by 2030, experts said.		NO RIVER or lake in England is free from chemical pollution, making the country's waterways some of the dirtiest in Europe.	Beccy Speight, CEO of the RSPB, said: 'Our waterways are the lifeblood of our environment. We think of our rivers, canals, lakes and wetlands as beautiful landscape features but they are also vital to life, provide homes for our precious wildlife and, in good condition, can help tackle the climate crisis by storing huge amount of carbon.	All of our water bodies have failed their pollution quality tests, a new report from the Department for Environment, Food and Rural Affairs (Defra) has found, despite a target for all waters to be in good health by 2027.				•Canadian experts modelled future pollution under different mitigation efforts •The scenario is seven times worse than the amount deemed shocking in 2005	•Canadian experts modelled future pollution under different mitigation efforts •The scenario is seven times worse than the amount deemed shocking in 2005	This would be a Herculean task given this is 660 times the effort of the 2019 cleanup.'		•The scenario is seven times worse than the amount deemed shocking in 2005 •We must focus on recycling plastic, rather than producing more, the team said Even if world nations meet their environmental commitments, a staggering 53 million tonnes of plastic will enter the world's waters annually by 2030, experts said. 'To put that last number into people power, the cleanup alone would require at le…									This will occur, she said, 'even if governments around the world meet their ambitious global commitments, and other countries join those efforts to curb plastic pollution.'	•Canadian experts modelled future pollution under different mitigation efforts 'Worldwide annual emissions to rivers, lakes and oceans could be as much as 53 million metric tonnes by the year 2030,' added paper author and conservation biologist Stephanie Borrelle, also of the University of Toronto. This will occur, she said, 'even if governments around the world meet their ambitious global commit…			•We must focus on recycling plastic, rather than producing more, the team said Even if world nations meet their environmental commitments, a staggering 53 million tonnes of plastic will enter the world's waters annually by 2030, experts said. The researchers added that the world must act now to support a focus on recycling - rather than creating more plastic that will pollute the Earth's rivers a…
NA	11	11.4	114													HUMANS will be dumping 53 million tons of plastic a year in rivers, lakes and oceans by 2030, ecologists are warning.								And it is a conservative forecast, based on countries hitting goals on cutting plastic pollution. Halting the tide means a switch from making new plastic to recycling. It suggests production must be cut and cleanups stepped up.								HUMANS will be dumping 53 million tons of plastic a year in rivers, lakes and oceans by 2030, ecologists are warning.	HUMANS will be dumping 53 million tons of plastic a year in rivers, lakes and oceans by 2030, ecologists are warning. Researcher Stephanie Borrelle said: "This would be a Herculean task."			HUMANS will be dumping 53 million tons of plastic a year in rivers, lakes and oceans by 2030, ecologists are warning. Our mountain of waste will be nearly seven times the level deemed unacceptable in 2015. Researcher Stephanie Borrelle said: "This would be a Herculean task."							HUMANS will be dumping 53 million tons of plastic a year in rivers, lakes and oceans by 2030, ecologists are warning.		HUMANS will be dumping 53 million tons of plastic a year in rivers, lakes and oceans by 2030, ecologists are warning.	HUMANS will be dumping 53 million tons of plastic a year in rivers, lakes and oceans by 2030, ecologists are warning. And it is a conservative forecast, based on countries hitting goals on cutting plastic pollution.
NA	11	11.5	497						They found these mitigation strategies are not enough to keep plastic pollution in check, adding that an “enormous” amount of effort would be required to keep emissions below eight million tonnes a year. “That’s far beyond the eight million metric tonnes amount that was declared unacceptable in 2015.”									Even if governments around the world meet their ambitious global commitments, and other countries join those efforts to curb plastic pollution, worldwide annual emissions to rivers, lakes and oceans could be as much as 53 million metric tonnes by the year 2030		Even if governments around the world meet their ambitious global commitments, and other countries join those efforts to curb plastic pollution, worldwide annual emissions to rivers, lakes and oceans could be as much as 53 million metric tonnes by the year 2030	She added: “The global community must co-ordinate a fundamental transformation of the plastics economy, one that reduces the amount of virgin plastic production, and reimagines how we make use and dispose of plastic materials.”		In a new modelling study published in the journal Science, ecologists monitoring pollution in aquatic ecosystems have voiced their concern, saying more needs to be done to reduce emissions.	Chelsea Rochman, an assistant professor in the department of ecology and evolutionary biology at the University of Toronto, and senior author on the study, said: “Unless growth in plastic production and use is halted, a fundamental transformation of the plastic economy to a framework based on recycling is essential, where end-of-life plastic products are valued rather than becoming waste.” The gl…								As much as 53 million tonnes of plastic could end up in rivers, lakes and oceans every year by the end of the decade, even if global commitments to reduce plastic pollution are met, experts have warned.	As much as 53 million tonnes of plastic could end up in rivers, lakes and oceans every year by the end of the decade, even if global commitments to reduce plastic pollution are met, experts have warned.				As much as 53 million tonnes of plastic could end up in rivers, lakes and oceans every year by the end of the decade, even if global commitments to reduce plastic pollution are met, experts have warned. They found these mitigation strategies are not enough to keep plastic pollution in check, adding that an “enormous” amount of effort would be required to keep emissions below eight million tonnes …								As much as 53 million tonnes of plastic could end up in rivers, lakes and oceans every year by the end of the decade, even if global commitments to reduce plastic pollution are met, experts have warned.	As much as 53 million tonnes of plastic could end up in rivers, lakes and oceans every year by the end of the decade, even if global commitments to reduce plastic pollution are met, experts have warned. Chelsea Rochman, an assistant professor in the department of ecology and evolutionary biology at the University of Toronto, and senior author on the study, said: “Unless growth in plastic producti…
NA	11	11.7	130																				In a new modelling study published in the journal Science, ecologists monitoring pollution in aquatic ecosystems have voiced their concern, saying more needs to be done to reduce emissions.	Chelsea Rochman, an assistant professor in the department of ecology and evolutionary biology at the University of Toronto and senior author on the study, said: "Unless growth in plastic production and use is halted, a fundamental transformation of the plastic economy to a framework based on recycling is essential, where end-of-life plastic products are valued rather than becoming waste."								AS much as 53 million tonnes of plastic could end up in rivers, lakes and oceans every year by the end of the decade, even if global commitments to reduce plastic pollution are met, experts have warned.	AS much as 53 million tonnes of plastic could end up in rivers, lakes and oceans every year by the end of the decade, even if global commitments to reduce plastic pollution are met, experts have warned.				AS much as 53 million tonnes of plastic could end up in rivers, lakes and oceans every year by the end of the decade, even if global commitments to reduce plastic pollution are met, experts have warned.								AS much as 53 million tonnes of plastic could end up in rivers, lakes and oceans every year by the end of the decade, even if global commitments to reduce plastic pollution are met, experts have warned.	AS much as 53 million tonnes of plastic could end up in rivers, lakes and oceans every year by the end of the decade, even if global commitments to reduce plastic pollution are met, experts have warned. Chelsea Rochman, an assistant professor in the department of ecology and evolutionary biology at the University of Toronto and senior author on the study, said: "Unless growth in plastic productio…
NA	11	11.8	560				Images of marine life strangled in plastic and beaches filled with discarded bottles have sparked public protests and, in turn, corporations and governments proposing a series of promises to increase recycling.		"Voluntary industry initiatives and commitments have failed," says Nusa Urbancic, campaign manager at Changing Markets.					(Bloomberg) -- Companies that create much of the 23 million metric tons of plastic garbage that reach the oceans and rivers each year fail to slow waste flow and, in some cases, are cheating on their efforts, according to two new reports.				A group of scientists led by Stephanie B. Borrelle of the University of Toronto developed a model for assessing ambitious commitments to curb plastic waste by countries, international organizations such as the United Nations, and independent groups. Images of marine life strangled in plastic and beaches filled with discarded bottles have sparked public protests and, in turn, corporations and gove…	A group of scientists led by Stephanie B. Borrelle of the University of Toronto developed a model for assessing ambitious commitments to curb plastic waste by countries, international organizations such as the United Nations, and independent groups. Images of marine life strangled in plastic and beaches filled with discarded bottles have sparked public protests and, in turn, corporations and gove…	A group of scientists led by Stephanie B. Borrelle of the University of Toronto developed a model for assessing ambitious commitments to curb plastic waste by countries, international organizations such as the United Nations, and independent groups.								These findings were reinforced by a separate investigation by a London-based environmental advocacy group called the Changing Markets Foundation. Through their research, the group found that the top 10 corporate plastic producers failed to achieve even their own goals to reduce the use of virgin plastic.				(Bloomberg) -- Companies that create much of the 23 million metric tons of plastic garbage that reach the oceans and rivers each year fail to slow waste flow and, in some cases, are cheating on their efforts, according to two new reports. A group of scientists led by Stephanie B. Borrelle of the University of Toronto developed a model for assessing ambitious commitments to curb plastic waste by c…	A group of scientists led by Stephanie B. Borrelle of the University of Toronto developed a model for assessing ambitious commitments to curb plastic waste by countries, international organizations such as the United Nations, and independent groups.	"Voluntary industry initiatives and commitments have failed," says Nusa Urbancic, campaign manager at Changing Markets. "Policymakers should look beyond the industry's smokescreen." Original Note:Voluntary Efforts CurbWorld's Plastic Problem Aren't Working ©2020 Bloomberg L.P.			"Voluntary industry initiatives and commitments have failed," says Nusa Urbancic, campaign manager at Changing Markets. "Policymakers should look beyond the industry's smokescreen."						(Bloomberg) -- Companies that create much of the 23 million metric tons of plastic garbage that reach the oceans and rivers each year fail to slow waste flow and, in some cases, are cheating on their efforts, according to two new reports. These findings were reinforced by a separate investigation by a London-based environmental advocacy group called the Changing Markets Foundation. Through their …			A group of scientists led by Stephanie B. Borrelle of the University of Toronto developed a model for assessing ambitious commitments to curb plastic waste by countries, international organizations such as the United Nations, and independent groups. Images of marine life strangled in plastic and beaches filled with discarded bottles have sparked public protests and, in turn, corporations and gove…			"Without great technological innovation, it is inconceivable that efforts to recover plastic waste from the environment can reach even 10% of annual emissions," the researchers said in their report, published Thursday in the journal Science.
NA	11	11.23	814				Multiple scientific methods were needed to understand the potential impact of plastics on ocean wildlife. Larger plastic can entangle wildlife, while microplastics and even smaller pieces could be consumed by an array of species from plankton to whales. Leaders from more than 70 countries signed a voluntary pledge in September to reverse biodiversity loss which included a goal to stop plastic ent…											Leaders from more than 70 countries signed a voluntary pledge in September to reverse biodiversity loss which included a goal to stop plastic entering the ocean by 2050.					“This means it’s throughout the water column. This gives us pause for thought about the world we live in and the impact of our consumer habits on what’s considered a most pristine place,” she said. “We need to make sure the big blue is not a big trash pit. This is more evidence that we need to stop this at the source.”					The cores were drilled in March and April 2017 between 288km and 349km from the coast, at depths of between 1,655 metres and 3,016 metres. Hardesty said it wasn’t possible to know how old the pieces of plastic were, or what sort of object they had once been part of. But she said the shape of the pieces under a microscope suggested they were once consumer items. For the study, the researchers extr…				At least 14m tonnes of plastic pieces less than 5mm wide are likely sitting at the bottom of the world’s oceans, according to an estimate based on new research.	Researchers looked at 51 samples and found that after excluding the weight of the water, each gram of sediment contained an average of 1.26 microplastic pieces.	Stemming the tide of plastic entering the world’s waterways and ocean has emerged as a major international challenge.			At least 14m tonnes of plastic pieces less than 5mm wide are likely sitting at the bottom of the world’s oceans, according to an estimate based on new research. Analysis of ocean sediments from as deep as 3km suggests there could be more than 30 times as much plastic at the bottom of the world’s ocean than there is floating at the surface. “I think the ultimate fate [of marine plastics] is the de…						Major countries that did not sign the pledge included the United States, Brazil, China, Russia, India and Australia.	Leaders from more than 70 countries signed a voluntary pledge in September to reverse biodiversity loss which included a goal to stop plastic entering the ocean by 2050.		Australia’s government science agency, CSIRO, gathered and analysed cores of the ocean floor taken at six remote sites about 300km off the country’s southern coast in the Great Australian Bight. Dr Denise Hardesty, a principal research scientist at CSIRO and a co-author of the research published in the journal Frontiers in Marine Science, told the Guardian that finding microplastic in such a remo…
NA	11	11.20	917		often without approval, and that directly endanger the lives of Indigenous women. Unequal health impacts Across the globe, health problems associated with plastics production disproportionately affect lower-income Black, Indigenous, people of colour (BIPOC) communities. An estimated 15 million waste pickers worldwide pluck the most valuable pieces of plastic from mountains of imported waste to ma…				New research published in Science shows that even if governments around the world adhere to their global commitments to address plastic pollution, and all others join in these efforts, in 2030 we will still emit between 20 million and 53 million tonnes of plastic waste into the world’s aquatic ecosystems. Global commitments do not match the scale of the problem — we need to rethink our strategy. …			By rallying for policies that tackle the underlying structures that perpetuate the plastic pollution crisis, we can reverse inequality, fulfil human rights obligations, improve the health of all communities and prevent and mitigate ecological damage.	This would include abolishing US$296 billion in subsidies provided annually by governments to petrochemical companies and introducing laws that require companies to pay for waste collection, recycling or disposal, rather than taxpayers.	This would include abolishing US$296 billion in subsidies provided annually by governments to petrochemical companies and introducing laws that require companies to pay for waste collection, recycling or disposal, rather than taxpayers.				New research published in Science shows that even if governments around the world adhere to their global commitments to address plastic pollution, and all others join in these efforts, in 2030 we will still emit between 20 million and 53 million tonnes of plastic waste into the world’s aquatic ecosystems.			New research published in Science shows that even if governments around the world adhere to their global commitments to address plastic pollution, and all others join in these efforts, in 2030 we will still emit between 20 million and 53 million tonnes of plastic waste into the world’s aquatic ecosystems. Global commitments do not match the scale of the problem — we need to rethink our strategy.		If ever there was a time to redefine the business-as-usual plastics industry and transition to a healthy and more equitable global society, it is now.	Progress requires us to address the structural inequality that encourages and normalizes the waste of resources, ecological destruction and the perpetuation of colonial systems.		Virgin plastics are cheaper to produce than recycled products, undermining the viability of the recycling sector. For example, in 2019, California’s largest recycling plant closed, laying off 750 employees, because of increased business costs and falling prices for recycled materials.						New research published in Science shows that even if governments around the world adhere to their global commitments to address plastic pollution, and all others join in these efforts, in 2030 we will still emit between 20 million and 53 million tonnes of plastic waste into the world’s aquatic ecosystems. Global commitments do not match the scale of the problem — we need to rethink our strategy.	New research published in Science shows that even if governments around the world adhere to their global commitments to address plastic pollution, and all others join in these efforts, in 2030 we will still emit between 20 million and 53 million tonnes of plastic waste into the world’s aquatic ecosystems. Global commitments do not match the scale of the problem — we need to rethink our strategy. …	lastic production and consumption has snowballed since large-scale production began in the 1950s. In 2020, an estimated 24 million to 34 million tonnes of plastic waste will enter the world’s lakes, rivers and oceans. That is roughly the weight of 21,000 rail locomotives. It’s no coincidence that Louisiana, a hotbed for the petrochemical sector, is the epicentre of what is known as “Cancer Alley.…			And if trends continue without improvements in the way we manage plastic waste, we could be spewing as much as 90 million tonnes of plastic waste into the world’s waters by 2030. Already, an estimated 10,000 tonnes of plastic waste enter the Great Lakes every year. New research published in Science shows that even if governments around the world adhere to their global commitments to address plast…			By rallying for policies that tackle the underlying structures that perpetuate the plastic pollution crisis, we can reverse inequality, fulfil human rights obligations, improve the health of all communities and prevent and mitigate ecological damage. Policies like the Green New Deal are moving us in the right direction, but we need to do more. If ever there was a time to redefine the business-as-…		For example, in 2019, California’s largest recycling plant closed, laying off 750 employees, because of increased business costs and falling prices for recycled materials. They give companies access to the raw materials used to make plastics today — oil and ethane gas — often without approval, and that directly endanger the lives of Indigenous women. Across the globe, health problems associated w…	They give companies access to the raw materials used to make plastics today — oil and ethane gas — often without approval, and that directly endanger the lives of Indigenous women. Quantifying the scale and extent of plastic pollution helps us understand the kind of effort needed to make change, but just as vital is mapping the health, economic, cultural and human rights dimensions of this toxic …	Several international platforms emerged to address the crisis, including Our Ocean, the UN Sustainable Development Goals and the G7 Ocean Plastic Charter, among others.		New research published in Science shows that even if governments around the world adhere to their global commitments to address plastic pollution, and all others join in these efforts, in 2030 we will still emit between 20 million and 53 million tonnes of plastic waste into the world’s aquatic ecosystems. Global commitments do not match the scale of the problem — we need to rethink our strategy. …
PR	11	11.Ecologists sound alarm on plastic pollution	467						The researchers note, however, that even if the prescribed e~ort is realized, the world remains locked into an unacceptable plastic future.									"Even if governments around the world meet their ambitious global commitments, and other countries join those e~orts to curb plastic pollution, worldwide annual emissions to rivers, lakes and oceans could be as much as 53 million metric tonnes by the year 2030," says Stephanie Borrelle, Smith Postdoctoral Fellow at U of T and lead author on the study. "That's far beyond the 8 million metric tonne…		"Even if governments around the world meet their ambitious global commitments, and other countries join those e~orts to curb plastic pollution, worldwide annual emissions to rivers, lakes and oceans could be as much as 53 million metric tonnes by the year 2030," says Stephanie Borrelle, Smith Postdoctoral Fellow at U of T and lead author on the study. "That's far beyond the 8 million metric tonne…	"The global community must coordinate a fundamental transformation of the plastics economy, one that reduces the amount of virgin plastic production, and reimagines how we make use and dispose of plastic materials," says Rochman.		"The global community must coordinate a fundamental transformation of the plastics economy, one that reduces the amount of virgin plastic production, and reimagines how we make use and dispose of plastic materials," says Rochman.	"Unless growth in plastic production and use is halted, a fundamental transformation of the plastic economy to a framework based on recycling is essential, where end-of-life plastic products are valued rather than becoming waste," says Chelsea Rochman, assistant professor in the Department of Ecology & Evolutionary Biology at the University of Toronto (U of T), and senior author of a study publis…								TORONTO, ON - Ecologists studying the prevalence of plastic pollution in aquatic ecosystems around the world are concerned after measuring the scale of human response needed to reduce future emissions and manage what's already ~oating around out there.	TORONTO, ON - Ecologists studying the prevalence of plastic pollution in aquatic ecosystems around the world are concerned after measuring the scale of human response needed to reduce future emissions and manage what's already ~oating around out there.	"To put that last number into people power, the cleanup alone would require at least 1 billion people participating in Ocean Conservancy's annual International Coastal Cleanup," says Borrelle. "This would be a Herculean task given this is 660 times the e~ort of the 201 9 cleanup."		"To put that last number into people power, the cleanup alone would require at least 1 billion people participating in Ocean Conservancy's annual International Coastal Cleanup," says Borrelle. "This would be a Herculean task given this is 660 times the e~ort of the 201 9 cleanup." The researchers note, however, that even if the prescribed e~ort is realized, the world remains locked into an unacce…										The research by an international group of experts led by Rochman and Borrelle, consisted of an evaluation of the level of e~ort needed to achieve a global reduction target for plastic pollution of less than 8 million metric tonnes (MT).		"Unless growth in plastic production and use is halted, a fundamental transformation of the plastic economy to a framework based on recycling is essential, where end-of-life plastic products are valued rather than becoming waste," says Chelsea Rochman, assistant professor in the Department of Ecology & Evolutionary Biology at the University of Toronto (U of T), and senior author of a study publis…
	11	11.9	46																					To clear it away, Toronto University's Stephanie Borrelle said at least 1billion people taking part in Ocean Conservancy's annual International Coastal Cleanup would be needed.								SOME 53million tonnes of plastic will pollute rivers, lakes and oceans by 2030, ecologists have warned.	SOME 53million tonnes of plastic will pollute rivers, lakes and oceans by 2030, ecologists have warned.				SOME 53million tonnes of plastic will pollute rivers, lakes and oceans by 2030, ecologists have warned. To clear it away, Toronto University's Stephanie Borrelle said at least 1billion people taking part in Ocean Conservancy's annual International Coastal Cleanup would be needed.								SOME 53million tonnes of plastic will pollute rivers, lakes and oceans by 2030, ecologists have warned.	SOME 53million tonnes of plastic will pollute rivers, lakes and oceans by 2030, ecologists have warned. To clear it away, Toronto University's Stephanie Borrelle said at least 1billion people taking part in Ocean Conservancy's annual International Coastal Cleanup would be needed.
NA	17	17.11	82				Ensnared by a plastic fishing rope, this mako shark is one of many suffering the effects of waste dumped in the ocean. Abandoned nets, plastic bags and ropes are an overlooked threat to the survival of the species, a study shows.							Ensnared by a plastic fishing rope, this mako shark is one of many suffering the effects of waste dumped in the ocean. Abandoned nets, plastic bags and ropes are an overlooked threat to the survival of the species, a study shows.																		Ensnared by a plastic fishing rope, this mako shark is one of many suffering the effects of waste dumped in the ocean. Abandoned nets, plastic bags and ropes are an overlooked threat to the survival of the species, a study shows.	More than 1,000 cases of sharks and rays affected by plastic have been reported, according to researchers from the University of Exeter.				Ensnared by a plastic fishing rope, this mako shark is one of many suffering the effects of waste dumped in the ocean. Abandoned nets, plastic bags and ropes are an overlooked threat to the survival of the species, a study shows. But they believe the number is likely to be far higher as few studies have focused on plastic entanglement among sharks and rays.									More than 1,000 cases of sharks and rays affected by plastic have been reported, according to researchers from the University of Exeter.
NA	17	17.12	145				More than a thousand sharks and rays are known to have become entangled in plastic debris with a "significantly greater number of species" likely to be affected, a study has found.							The true number is likely to be far higher, the researchers said, describing debris from landbased pollution and discarded fishing gear as a "severely underreported threat". Professor Brendan Godley, study co-author and co-ordinator of the university's marine strategy, said: "Due to the threats of direct overfishing of sharks and rays, and 'by-catch', the issue of entanglement has perhaps gone a …																		More than a thousand sharks and rays are known to have become entangled in plastic debris with a "significantly greater number of species" likely to be affected, a study has found.	Scientists at the University of Exeter uncovered reports of 1,116 of the creatures caught up in plastic in the world's oceans after examining existing studies and social media.	Professor Brendan Godley, study co-author and co-ordinator of the university's marine strategy, said: "Due to the threats of direct overfishing of sharks and rays, and 'by-catch', the issue of entanglement has perhaps gone a little under the radar."			Professor Brendan Godley, study co-author and co-ordinator of the university's marine strategy, said: "Due to the threats of direct overfishing of sharks and rays, and 'by-catch', the issue of entanglement has perhaps gone a little under the radar." Dozens of species were affected including whale sharks, great whites, tiger and basking sharks.									Scientists at the University of Exeter uncovered reports of 1,116 of the creatures caught up in plastic in the world's oceans after examining existing studies and social media.
PR	17	17.Hundreds of sharks and rays tangled in plasti	557				Hundreds of sharks and rays have become tangled in plastic waste in the world's oceans, new research shows. "Additionally, there's a real animal welfare issue because entanglements can cause pain, su~ering and even death."							The study says such entanglement - mostly involving lost or discarded ~shing gear - is a "far lesser threat" to sharks and rays than commercial ~shing, but the su~ering it causes is a major animal welfare concern. Co-author Professor Brendan Godley, co-ordinator of the university's marine strategy, added: "Due to the threats of direct over-~shing of sharks and rays, and 'bycatch' (accidental catc…		The paper, published in the journal Endangered Species Research, is entitled: "A global review of shark and ray entanglement in anthropogenic marine debris."														The paper, published in the journal Endangered Species Research, is entitled: "A global review of shark and ray entanglement in anthropogenic marine debris."		Hundreds of sharks and rays have become tangled in plastic waste in the world's oceans, new research shows.	University of Exeter scientists scoured existing published studies and Twitter for shark and ray entanglements, and found reports of more than 1 ,000 entangled individuals.	Co-author Professor Brendan Godley, co-ordinator of the university's marine strategy, added: "Due to the threats of direct over-~shing of sharks and rays, and 'bycatch' (accidental catching while ~shing for other species), the issue of entanglement has perhaps gone a little under the radar.		The study says such entanglement - mostly involving lost or discarded ~shing gear - is a "far lesser threat" to sharks and rays than commercial ~shing, but the su~ering it causes is a major animal welfare concern.												"One example in the study is a short~n mako shark with ~shing rope wrapped tightly around it," said Kristian Parton, of the Centre for Ecology and Conservation on Exeter's Penryn Campus in Cornwall. "The shark had clearly continued growing after becoming entangled, so the rope - which was covered in barnacles - had dug into its skin and damaged its spine. "Although we don't think entanglement is …
NA	17	17.4	410				Every day our environment is being threatened by endless plastic pollution in the ocean, resulting to which hundreds of sharks and rays are found tangled in plastic waste, reported a study.							The study which published in the journal of Endangered Species Research, stated such entanglement mostly involving lost or discarded fishing gear is a "far lesser threat" to sharks and rays than commercial fishing, but the suffering it causes is a major animal welfare concern. Both data sources suggested "ghost" fishing gear (nets, lines, and other equipment lost or abandoned) were by far the mos…																		Every day our environment is being threatened by endless plastic pollution in the ocean, resulting to which hundreds of sharks and rays are found tangled in plastic waste, reported a study.	Scientists scoured existing published studies and social media site for shark and ray entanglements and found reports of more than 1,000 entangled individuals.	"Due to the threats of direct over-fishing of sharks and rays, and 'bycatch' (accidental catching while fishing for other species), the issue of entanglement has perhaps gone a little under the radar," co-author professor Brendan Godley, said.			Every day our environment is being threatened by endless plastic pollution in the ocean, resulting to which hundreds of sharks and rays are found tangled in plastic waste, reported a study. On social media site, the researchers found 74 entanglement reports involving 559 individual sharks and rays from 26 species including whale sharks, great whites, tiger sharks and basking sharks. Both data sou…						The study which published in the journal of Endangered Species Research, stated such entanglement mostly involving lost or discarded fishing gear is a "far lesser threat" to sharks and rays than commercial fishing, but the suffering it causes is a major animal welfare concern	"We set out to remedy this. Our study was the first to use social media site to gather such data, and our results from the social media site revealed entanglements of species and in places not recorded in the academic papers," he added.		Scientists scoured existing published studies and social media site for shark and ray entanglements and found reports of more than 1,000 entangled individuals. "Due to the threats of direct over-fishing of sharks and rays, and 'bycatch' (accidental catching while fishing for other species), the issue of entanglement has perhaps gone a little under the radar," co-author professor Brendan Godley, s…
NA	17	17.7	474				Scientists at the University of Exeter found reports of 1,116 of the creatures caught up in plastic in the world's oceans after scouring existing studies and social media.							"Due to the threats of direct overfishing of sharks and rays, and 'bycatch' (accidental catching while fishing for other species), the issue of entanglement has perhaps gone a little under the radar," said Professor Brendan Godley, co-ordinator of the university's marine strategy. The scientists acknowledged that entanglement is a "far lesser threat" than commercial fishing, but said it remains a…		Horrifying photo shows manta ray swimming in cloud of plastic waste dumped by humans																More than a thousand sharks and rays are known to have become entangled in plastic debris with "significantly greater number of species" likely to be affected, a study found.	Scientists at the University of Exeter found reports of 1,116 of the creatures caught up in plastic in the world's oceans after scouring existing studies and social media.	"Due to the threats of direct overfishing of sharks and rays, and 'bycatch' (accidental catching while fishing for other species), the issue of entanglement has perhaps gone a little under the radar," said Professor Brendan Godley, co-ordinator of the university's marine strategy.		Scientists at the University of Exeter found reports of 1,116 of the creatures caught up in plastic in the world's oceans after scouring existing studies and social media. The true number is likely to be far higher, the researchers said, calling debris from land-based pollution and discarded fishing gear a "severely under-reported threat". Horrifying photo shows manta ray swimming in cloud of pla…							Horrifying photo shows manta ray swimming in cloud of plastic waste dumped by humans The scientists acknowledged that entanglement is a "far lesser threat" than commercial fishing, but said it remains a "major animal welfare concern", with possible conservation implications.	"We set out to remedy this. Our study was the first to use Twitter to gather such data, and our results from the social media site revealed entanglements of species - and in places - not recorded in the academic papers."		Scientists at the University of Exeter found reports of 1,116 of the creatures caught up in plastic in the world's oceans after scouring existing studies and social media. "Due to the threats of direct overfishing of sharks and rays, and 'bycatch' (accidental catching while fishing for other species), the issue of entanglement has perhaps gone a little under the radar," said Professor Brendan God…			The true number is likely to be far higher, the researchers said, calling debris from land-based pollution and discarded fishing gear a "severely under-reported threat".
NA	17	17.5	584				Hundreds of sharks and rays have become tangled in plastic waste in the world's oceans, new research from a team based in Penryn shows. "Additionally, there's a real animal welfare issue because entanglements can cause pain, suffering and even death."							"Additionally, there's a real animal welfare issue because entanglements can cause pain, suffering and even death." Co-author Professor Brendan Godley, co-ordinator of the university's marine strategy, added: "Due to the threats of direct over-fishing of sharks and rays, and 'bycatch' (accidental catching while fishing for other species), the issue of entanglement has perhaps gone a little under …																The paper, published in the journal Endangered Species Research, is entitled 'A global review of shark and ray entanglement in anthropogenic marine debris'.		Hundreds of sharks and rays have become tangled in plastic waste in the world's oceans, new research from a team based in Penryn shows.	Hundreds of sharks and rays have become tangled in plastic waste in the world's oceans, new research from a team based in Penryn shows. University of Exeter scientists based at Tremough Campus scoured existing published studies and Twitter for shark and ray entanglements and found reports of more than 1,000 entangled individuals.	"Additionally, there's a real animal welfare issue because entanglements can cause pain, suffering and even death." Co-author Professor Brendan Godley, co-ordinator of the university's marine strategy, added: "Due to the threats of direct over-fishing of sharks and rays, and 'bycatch' (accidental catching while fishing for other species), the issue of entanglement has perhaps gone a little under …			Hundreds of sharks and rays have become tangled in plastic waste in the world's oceans, new research from a team based in Penryn shows.						The study says such entanglement - mostly involving lost or discarded fishing gear - is a "far lesser threat" to sharks and rays than commercial fishing, but the suffering it causes is a major animal welfare concern.	"We set out to remedy this. Our study was the first to use Twitter to gather such data, and our results from the social media site revealed entanglements of species - and in places - not recorded in the academic papers."		"One example in the study is a shortfin mako shark with fishing rope wrapped tightly around it," said Kristian Parton, of the Centre for Ecology and Conservation on Exeter's Penryn Campus. "Additionally, there's a real animal welfare issue because entanglements can cause pain, suffering and even death." Co-author Professor Brendan Godley, co-ordinator of the university's marine strategy, added: "…
NA	17	17.10	540				HORRIFYING images show great white sharks and giant rays tangled up in plastic and other waste to have been dumped in the Earth's oceans.							It found that discarded or lost fishing nets accounted for the overwhelmingly majority - 74 per cent - of incidents, with plastic loops causing 11 per cent.		A total of eight great white sharks were found to have become tangled in man-made waste.		In October 2018, the European parliament voted overwhelmingly in favour of a ban on single-use plastic, expected to come into force by 2021.										This week, the corpse of a sperm whale was found to contain three plastic bottles and hundreds of smaller pieces of plastic after washing up on the shoreline of Krabi in Thailand. An autopsy later found the cause of death to be inflammation of the stomach. In the past 30 years, a total of 21 sperm whales have washed up dead on beaches around Thailand.				HORRIFYING images show great white sharks and giant rays tangled up in plastic and other waste to have been dumped in the Earth's oceans.	They come after research published this week that collated hundreds of examples of entanglement, which the authors say is a growing and under-reported problem.	Professor Brendan Godley, co-author of this week's study and co-ordinator of the University of Exeter's marine strategy, told the Daily Mail: "Due to the threats of direct overfishing of sharks and rays, and 'bycatch' [accidental catching while fishing for other species], the issue of entanglement has perhaps gone a little under the radar.		HORRIFYING images show great white sharks and giant rays tangled up in plastic and other waste to have been dumped in the Earth's oceans.					In October 2018, the European parliament voted overwhelmingly in favour of a ban on single-use plastic, expected to come into force by 2021.			"We set out to remedy this. In October 2018, the European parliament voted overwhelmingly in favour of a ban on single-use plastic, expected to come into force by 2021.		Professor Brendan Godley, co-author of this week's study and co-ordinator of the University of Exeter's marine strategy, told the Daily Mail: "Due to the threats of direct overfishing of sharks and rays, and 'bycatch' [accidental catching while fishing for other species], the issue of entanglement has perhaps gone a little under the radar. British naturalist David Attenborough and chef Hugh Fearn…
NA	17	17.3	264	2			ENSNARED by a plastic fishing rope, this shark is one of many suffering the effects of waste dumped in the ocean.							Abandoned nets, plastic bags and ropes are an overlooked threat to the survival of the species, a study shows. They found plastic bands' were responsible for 11 per cent of entanglements, the second most common peril after discarded fishing nets - which accounted for 74 per cent of hazards.																		ENSNARED by a plastic fishing rope, this shark is one of many suffering the effects of waste dumped in the ocean. Abandoned nets, plastic bags and ropes are an overlooked threat to the survival of the species, a study shows.	More than 1,000 cases of sharks and rays affected by plastic have been reported, according to researchers.				The scientists, writing in Endangered Species Research, said plastic in the sea could have potential negative implications on rapidly declining populations'. Researcher Kristian Parton said there was a real animal welfare issue because entanglements can cause pain, suffering and even death'.				The Daily Mail has campaigned against plastic waste for more than a decade.			The Daily Mail has campaigned against plastic waste for more than a decade.		More than 1,000 cases of sharks and rays affected by plastic have been reported, according to researchers. The Daily Mail has campaigned against plastic waste for more than a decade. The scientists, writing in Endangered Species Research, said plastic in the sea could have potential negative implications on rapidly declining populations'. Researcher Kristian Parton said there was a real animal we…			The scientists, writing in Endangered Species Research, said plastic in the sea could have potential negative implications on rapidly declining populations'. Researcher Kristian Parton said there was a real animal welfare issue because entanglements can cause pain, suffering and even death'.
NA	17	17.8	591				Scientists from the University of Exeter found evidence on Twitter of eight Great Whites being tangled in plastic waste from a host of sources, including 'ghost' fishing nets.							The research found these plastic bands were responsible for 11 per cent of entanglements, the second most common hazard after discarded fishing nets (74 per cent of hazards). The researchers reviewed existing studies and also appealed for information on Twitter, fearing that the issue had been pushed 'under the radar' by threats such as over-fishing. Co-author Professor Brendan Godley, co-ordinat…		Authors of the study, published in Endangered Species Research, wrote: 'If elasmobranchs are susceptible to entanglement in anthropogenic debris, this could have potential negative implications on rapidly declining populations.																•Researchers from the University of Exeter studied scientific literature and tweets •Found that a range of rays and sharks often get tangled in nets and plastic waste •A total of more than a thousand of the animals were recorded as being trapped •Scientists worry the issue of entanglement has been overshadowed by threats such as over-fishing The Great White shark has no natural enemies but the mi…	•Researchers from the University of Exeter studied scientific literature and tweets •Found that a range of rays and sharks often get tangled in nets and plastic waste •A total of more than a thousand of the animals were recorded as being trapped •Scientists worry the issue of entanglement has been overshadowed by threats such as over-fishing The Great White shark has no natural enemies but the mi…	•Scientists worry the issue of entanglement has been overshadowed by threats such as over-fishing The Great White shark has no natural enemies but the mighty species is fighting a losing battle against humans and our plastic pollution. Co-author Professor Brendan Godley, co-ordinator of the university's marine strategy, said: 'Due to the threats of direct overfishing of sharks and rays, and 'byca…		They said that there were alarmed to see reports regarding whale shark entanglement made on social media, compared to none in published studies.	'Entanglement can lead to starvation, suffocation, immobilisation and ultimately death, making this unequivocally an animal welfare issue, if not of conservation relevance.'						•Scientists worry the issue of entanglement has been overshadowed by threats such as over-fishing The Great White shark has no natural enemies but the mighty species is fighting a losing battle against humans and our plastic pollution. The scientists acknowledged that entanglement is a 'far lesser threat' than commercial fishing, but said it remains a 'major animal welfare concern', with possible…	We set out to remedy this. Our study was the first to use Twitter to gather such data, and our results from the social media site revealed entanglements of species - and in places - not recorded in the academic papers.'		•Scientists worry the issue of entanglement has been overshadowed by threats such as over-fishing The Great White shark has no natural enemies but the mighty species is fighting a losing battle against humans and our plastic pollution. The true number is likely to be far higher, the researchers said, calling debris from land-based pollution and discarded fishing gear a 'severely under-reported th…			The true number is likely to be far higher, the researchers said, calling debris from land-based pollution and discarded fishing gear a 'severely under-reported threat'. The scientists acknowledged that entanglement is a 'far lesser threat' than commercial fishing, but said it remains a 'major animal welfare concern', with possible conservation implications. 'Entanglement can lead to starvation, …
NA	17	17.6	679				Hundreds of sharks and rays are dying after gettingtangled in drifting "ghost nets" and plastic waste, according to new research.							Entanglement, mostly involving lost or discardedfishinggear,is a "far lesser threat" to sharks and rays than commercial fishing, but the suffering it causes is a major animal welfare concern, the study by a research team from the University of Exetersaid. Hundreds of sharks and rays are dying after gettingtangled in drifting "ghost nets" and plastic waste, according to new research.																		Hundreds of sharks and rays are dying after gettingtangled in drifting "ghost nets" and plastic waste, according to new research.	H owever, scientists have warned that the true number couldbe far higher. rofessor Brendan Godley, who co-ordinatesthe university's marine strategy, said: "Due to the threats of direct over-fishing of sharks and rays, and 'bycatch' (accidental catching while fishing for other species), the issue of entanglement has perhaps gone a little under the radar.	Her co-author, P rofessor Brendan Godley, who co-ordinatesthe university's marine strategy, said: "Due to the threats of direct over-fishing of sharks and rays, and 'bycatch' (accidental catching while fishing for other species), the issue of entanglement has perhaps gone a little under the radar.			Overall more than 100 million sharks are estimated to be killed each year by commercial fishing alone, with the true number estimated to be even higher - according to a 2013 estimate 230 million could be killed each year. In 2018 just 4 people were killed by sharks worldwide according to the International Shark Attack File.				"One example in the study is a shortfin mako shark with fishing rope wrapped tightly around it," said Kristian Parton, of the university's Centre for Ecology and Conservation. "The shark had clearly continued growing after becoming entangled, so the rope - which was covered in barnacles - had dug into its skin and damaged its spine." She added: "Although we don't think entanglement is a major thr…	In 2018 just 4 people were killed by sharks worldwide according to the International Shark Attack File.	Entanglement, mostly involving lost or discardedfishinggear,is a "far lesser threat" to sharks and rays than commercial fishing, but the suffering it causes is a major animal welfare concern, the study by a research team from the University of Exetersaid. Overall more than 100 million sharks are estimated to be killed each year by commercial fishing alone, with the true number estimated to be eve…	We set out to remedy this. Our study was the first to use Twitter to gather such data, and our results from the social media site revealed entanglements of species - and in places - not recorded in the academic papers."	H owever, scientists have warned that the true number couldbe far higher.	owever, scientists have warned that the true number couldbe far higher. "One example in the study is a shortfin mako shark with fishing rope wrapped tightly around it," said Kristian Parton, of the university's Centre for Ecology and Conservation. "The shark had clearly continued growing after becoming entangled, so the rope - which was covered in barnacles - had dug into its skin and damaged its…
NA	25	25.9	365				A turtle trapped in "ghost" fishing gear has washed up on a Cornish beach after a 4,750-mile trip from Texas. A worldwide survey of 106 marine experts by the university found that 91% of the entangled turtles are found dead, with many having suffered serious wounds which have amputated limbs or choked them to death.							A turtle trapped in "ghost" fishing gear has washed up on a Cornish beach after a 4,750-mile trip from Texas. He added: "There used to be loads of them but then we as humans started commercially fishing them for turtle soup and turtleshell goods, but that was stopped in the 1960s I think and through a concerted conservation effort their numbers are increasing."		He added: "There used to be loads of them but then we as humans started commercially fishing them for turtle soup and turtleshell goods, but that was stopped in the 1960s I think and through a concerted conservation effort their numbers are increasing."										A turtle trapped in "ghost" fishing gear has washed up on a Cornish beach after a 4,750-mile trip from Texas.							Photographer and marine conservation student Dave Hudson found the rare Kemps Ridley Turtle while out walking his dog on Holywell Bay Beach. A worldwide survey of 106 marine experts by the university found that 91% of the entangled turtles are found dead, with many having suffered serious wounds which have amputated limbs or choked them to death.	A turtle trapped in "ghost" fishing gear has washed up on a Cornish beach after a 4,750-mile trip from Texas.		A worldwide survey of 106 marine experts by the university found that 91% of the entangled turtles are found dead, with many having suffered serious wounds which have amputated limbs or choked them to death. Others that survived were forced to drag huge mounds of discarded rubbish or debris with them until they die. Professor Brendan Godley, professor of conservation science and director of the C…							He added: "There used to be loads of them but then we as humans started commercially fishing them for turtle soup and turtleshell goods, but that was stopped in the 1960s I think and through a concerted conservation effort their numbers are increasing."	Mr Hudson took the juvenile turtle, which is about 12 inches long, to Blue Reef Aquarium in Newquay, where it is now receiving round-the-clock treatment.		Photographer and marine conservation student Dave Hudson found the rare Kemps Ridley Turtle while out walking his dog on Holywell Bay Beach. Mr Hudson said this type of turtle should not be seen in British waters, but must have drifted across the ocean as it got hit by the cold and seized up.
NA	25	25.1	313				More than a thousand sea turtles die every year after becoming entangled in plastic and other waste dumped in the oceans and on beaches, a study has found (Ben Webster writes).							He said plastic pollution was a more immediate threat to turtles than either climate change or oil spills, though the biggest threat was being caught in fishing nets by vessels targeting other species.												In 2015, a male olive ridley turtle was found in Costa Rica with a 10cm plastic straw lodged in its nostril.	He said plastic pollution was a more immediate threat to turtles than either climate change or oil spills, though the biggest threat was being caught in fishing nets by vessels targeting other species.					More than a thousand sea turtles die every year after becoming entangled in plastic and other waste dumped in the oceans and on beaches, a study has found (Ben Webster writes).	The study, published in Endangered Species Research, concluded that at least 1,000 turtles were dying from entanglement with rubbish. The authors said this is likely to be a "gross underestimation of the scale of the threat" because very few of the dead bodies were recovered or reported.			The authors said this is likely to be a "gross underestimation of the scale of the threat" because very few of the dead bodies were recovered or reported. Brendan Godley, professor of conservation science and the lead author, said that the true number of turtles killed by rubbish in the sea was probably about 10,000 a year.								It was saved after marine biologists removed the straw with a small pair of pliers.		Scientists asked 106 turtle experts working on coasts around the world, with 84 per cent saying they had found turtles entangled in rubbish, including plastic debris. The study, published in Endangered Species Research, concluded that at least 1,000 turtles were dying from entanglement with rubbish. The authors said this is likely to be a "gross underestimation of the scale of the threat" because…			Brendan Godley, professor of conservation science and the lead author, said that the true number of turtles killed by rubbish in the sea was probably about 10,000 a year. Professor Godley said: "If a turtle becomes attached to a plastic sack it can't swim, dive or escape predation. It can take months to die." He said plastic pollution was a more immediate threat to turtles than either climate cha…
NA	25	25.12	727	2			•Plastic rubbish is posing a bigger risk to turtles than oil spills, new study reveals •91 per cent of turtles recorded as entangled in string were found dead •They had suffered serious wounds, leading to maiming, loss of limbs or choking More than nine in ten turtles found entangled in discarded plastic are dead by the time they are discovered, British research has revealed.							All species of turtle were found entangled, but Olive Ridley turtles, a species which forages in areas where marine debris accumulates, were the most likely to be found ensnared. Most entanglements recorded were in fishing gear. Since the 1950s, the fishing industry has replaced natural fibres such as cotton with plastic materials such as nylon, polyethylene, and polypropylene, which does not bio…		The report concludes: 'Entanglement with anthropogenic plastic materials such as discarded fishing gear, as well as land-based sources, is an underreported and underresearched threat to marine turtles.'					We need to cut the level of plastic waste and pursue biodegradable alternatives if we are to tackle this grave threat to turtles' welfare.' The research team surveyed experts who rescue turtles in 43 countries, to find out if they had discovered any which had been tangled up.		We need to cut the level of plastic waste and pursue biodegradable alternatives if we are to tackle this grave threat to turtles' welfare.' The research team surveyed experts who rescue turtles in 43 countries, to find out if they had discovered any which had been tangled up.	We need to cut the level of plastic waste and pursue biodegradable alternatives if we are to tackle this grave threat to turtles' welfare.' The research team surveyed experts who rescue turtles in 43 countries, to find out if they had discovered any which had been tangled up.			The research said: 'Surveyed experts rated entanglement a greater threat to marine turtles than oil pollution, climate change and direct exploitation but less of a threat than plastic ingestion and fisheries bycatch.'					•Plastic rubbish is posing a bigger risk to turtles than oil spills, new study reveals •91 per cent of turtles recorded as entangled in string were found dead •They had suffered serious wounds, leading to maiming, loss of limbs or choking More than nine in ten turtles found entangled in discarded plastic are dead by the time they are discovered, British research has revealed. The Daily Mail is at…	The research team surveyed experts who rescue turtles in 43 countries, to find out if they had discovered any which had been tangled up.	Juvenile members of the species also ride on ocean currents to zones where floating rubbish and debris is concentrated, creating an 'ecological trap'.		•Plastic rubbish is posing a bigger risk to turtles than oil spills, new study reveals •They had suffered serious wounds, leading to maiming, loss of limbs or choking More than nine in ten turtles found entangled in discarded plastic are dead by the time they are discovered, British research has revealed. They had suffered serious wounds from the ordeal, leading to maiming, loss of limbs or choki…								The Daily Mail is at the forefront of campaigns to stop plastic pollution poisoning our environment.	Lead author Brendan Godley, professor of conservation science at the University of Exeter warned that, as plastic pollution increases, more turtles are likely to become entangled.	The Daily Mail is at the forefront of campaigns to stop plastic pollution poisoning our environment. Lead author Brendan Godley, professor of conservation science at the University of Exeter warned that, as plastic pollution increases, more turtles are likely to become entangled.
NA	25	25.13	712				More than a thousand turtles die every year after becoming entangled in rubbish in the oceans and on beaches, new research has claimed. The rise in plastic refuse is reportedly killing turtles of all species, with hatchlings and young turtles especially at risk.							Most entanglements recorded were in lost or discarded fishing gear known as 'ghost fishing' rope, nets and lines. Since the 1950s the fishing industry has replaced natural fibres such as cotton, jute and hemp with synthetic plastic materials such as nylon, polyethylene and polypropylene which doesn't biodegrade in water. "And if chief executives of major companies like Coca-Cola want to avoid bei…		Will McCallum, Greenpeace UK's head of oceans, said: "The throwaway plastic we use for just minutes can turn into a floating trap for marine creatures like whales and turtles that lurks in our oceans for centuries. Paul de Zylva, senior nature campaigner at Friends of the Earth, added: "It's a tragedy that so many turtles die entangled in our plastic.		"If UK ministers are truly feeling inspired after watching Blue Planet 2, then a good place to start would be stopping plastics getting into the ocean by pushing ahead with plans for a deposit return scheme.	"And if chief executives of major companies like Coca-Cola want to avoid being part of the problem then they need to start reducing their plastic footprint without delay."		"We need to cut the level of plastic waste and purse biodegradable alternatives if we are to tackle this grave threat to turtles' welfare." "It's time to get drastic with plastic. We can all help by re-using bags, carrying a reusable water bottle and cutting down on plastic packaging."		"We need to cut the level of plastic waste and purse biodegradable alternatives if we are to tackle this grave threat to turtles' welfare." "It's time to get drastic with plastic. We can all help by re-using bags, carrying a reusable water bottle and cutting down on plastic packaging."	"We need to cut the level of plastic waste and purse biodegradable alternatives if we are to tackle this grave threat to turtles' welfare."		"If UK ministers are truly feeling inspired after watching Blue Planet 2, then a good place to start would be stopping plastics getting into the ocean by pushing ahead with plans for a deposit return scheme.		The research sheds light on the true threat of plastic pollution to marine turtles, which other research has shown also eat plastic rubbish and marine creatures caught up in it.				More than a thousand turtles die every year after becoming entangled in rubbish in the oceans and on beaches, new research has claimed.	Professor Brendan Godley, the lead author, warned that as plastic pollution increases more turtles are likely to become entangled.							The rise in plastic refuse is reportedly killing turtles of all species, with hatchlings and young turtles especially at risk. "We found, based on beach strandings, that more than 1,000 turtles are dying a year after becoming tangled up, but this is almost certainly a gross underestimate. "We need to cut the level of plastic waste and purse biodegradable alternatives if we are to tackle this grav…					Professor Brendan Godley, the lead author, warned that as plastic pollution increases more turtles are likely to become entangled.	Professor Brendan Godley, the lead author, warned that as plastic pollution increases more turtles are likely to become entangled. Will McCallum, Greenpeace UK's head of oceans, said: "The throwaway plastic we use for just minutes can turn into a floating trap for marine creatures like whales and turtles that lurks in our oceans for centuries.
NA	25	25.14	55				MORE than 1,000 marine turtles die every year after getting entangled in plastic, say researchers.																									MORE than 1,000 marine turtles die every year after getting entangled in plastic, say researchers.	MORE than 1,000 marine turtles die every year after getting entangled in plastic, say researchers.			The rise of refuse in the sea and on beaches is devastating all species.										Prof Brendan Godley said: "Young turtles are particularly vulnerable."
NA	25	25.15	115				MORE than 1,000 turtles die each year after becoming entangled in mainly plastic rubbish at sea and on beaches.							Debris, including plastic twine, fishing line, and can rings, has a particularly severe impact on hatchlings and young turtles. Prof Brendan Godley, lead author, said: "Plastic, including lost or discarded fishing gear which is not biodegradable, is a major threat to marine turtles."																			Prof Brendan Godley, lead author, said: "Plastic, including lost or discarded fishing gear which is not biodegradable, is a major threat to marine turtles."			Debris, including plastic twine, fishing line, and can rings, has a particularly severe impact on hatchlings and young turtles. Prof Brendan Godley, lead author, said: "Plastic, including lost or discarded fishing gear which is not biodegradable, is a major threat to marine turtles." He added it is a greater problem than oil spills and said 1,000 deaths was likely "a gross underestimate".										Prof Brendan Godley, lead author, said: "Plastic, including lost or discarded fishing gear which is not biodegradable, is a major threat to marine turtles."
NA	25	25.17	132				More than a thousand marine turtles die every year after becoming entangled in rubbish in the sea and on beaches, according to research. Plastic refuse is killing turtles of all species, with a disproportionate impact on hatchlings and young turtles. A worldwide survey by the University of Exeter found that 91 per cent of the entangled turtles were found dead.																									More than a thousand marine turtles die every year after becoming entangled in rubbish in the sea and on beaches, according to research.								"We need to cut the level of plastic waste and pursue biodegradable alternatives if we are to tackle this grave threat to turtles' welfare," said Professor Godley.
NA	25	25.7	582				Turtles are dying in large numbers after becoming entangledin plastic debris, according to an international study.							Discarded fishing gear was the main culprit, but turtles were also found trapped in "six pack"beer can holders, plastic chairs and balloon string. A particular problem is "ghost fishing", when lost or discarded fishing equipment continues to effectively trap marine life after fishermen have stopped using it.		"Nearly all species of turtle are endangered and yet research like this shows that the threats from human activity are only getting worse," said Will McCallum, head of oceans at Greenpeace UK. Mr McCallum said "the throwaway plastic we use for just minutes" is to blame for the creation of "floating traps" for marine creatures.		"If UK ministers are truly feeling inspired after watching Blue Planet II, then a good place to start would be stopping plastics getting into the ocean by pushing ahead with plans for a deposit return scheme," said Mr McCallum.	"And if CEOs of major companies like Coca-Cola want to avoid being part of the problem then they need to start reducing their plastic footprint without delay."		"We need to cut the level of plastic waste and pursue biodegradable alternatives if we are to tackle this grave threat to turtles' welfare," said Professor Godley.		"We need to cut the level of plastic waste and pursue biodegradable alternatives if we are to tackle this grave threat to turtles' welfare," said Professor Godley.	"We need to cut the level of plastic waste and pursue biodegradable alternatives if we are to tackle this grave threat to turtles' welfare," said Professor Godley.		Following the success of BBC documentaryBlue Planet II in the UK, increased interest in plastic pollution has been accompanied by Government interest in implementing measures to tackle the problem.		Previously environmentalists have found hundreds of shards of plastic in the stomachs of turtles, and many other species are known to eat plastic.				Turtles are dying in large numbers after becoming entangledin plastic debris, according to an international study.	The researchers estimate at least 1,000 turtles are dying this way every year. However, conservation scientist Professor Brendan Godley, who led the study - published in the journal Endangered Species Research - said this is "almost certainly a gross underestimate".	But the threat of entanglement is another frontier in the fight against marine plastic pollution, and one that the authors of this study call an "under reported and under researched threat to marine turtles". A particular problem is "ghost fishing", when lost or discarded fishing equipment continues to effectively trap marine life after fishermen have stopped using it. Mr McCallum said "the throw…		Turtles are dying in large numbers after becoming entangledin plastic debris, according to an international study.										However, conservation scientist Professor Brendan Godley, who led the study - published in the journal Endangered Species Research - said this is "almost certainly a gross underestimate". Professor Godley and his colleagues hope that raising awareness of this issue will help encourage people to seek alternatives to plastic in fishing and daily life. "Nearly all species of turtle are endangered an…
NA	25	25.8	372				More than 1,000 marine turtles die every year after becoming entangled in rubbish in the oceans and on beaches, according to new research.							"Plastic rubbish in the oceans, including lost or discarded fishing gear which is not biodegradable, is a major threat to marine turtles," he said.		Will McCallum, Greenpeace UK's head of oceans, said: "The throwaway plastic we use for just minutes can turn into a floating trap for marine creatures like whales and turtles that lurks in our oceans for centuries.		"If UK ministers are truly feeling inspired after watching Blue Planet 2, then a good place to start would be stopping plastics getting into the ocean by pushing ahead with plans for a deposit return scheme."			Paul de Zylva, senior nature campaigner at Friends of the Earth, added: "It's time to get drastic with plastic. We can all help by re-using bags, carrying a reusable water bottle and cutting down on plastic packaging."		Paul de Zylva, senior nature campaigner at Friends of the Earth, added: "It's time to get drastic with plastic. We can all help by re-using bags, carrying a reusable water bottle and cutting down on plastic packaging."	We can all help by re-using bags, carrying a reusable water bottle and cutting down on plastic packaging."								More than 1,000 marine turtles die every year after becoming entangled in rubbish in the oceans and on beaches, according to new research.	Professor Brendan Godley, the lead author of the new research, warned that as plastic pollution increases more turtles are likely to become entangled.				More than 1,000 marine turtles die every year after becoming entangled in rubbish in the oceans and on beaches, according to new research. The rise in plastic refuse in the ocean and on beaches is killing turtles of all species, with a disproportionate impact on hatchlings and young turtles.								Professor Brendan Godley, the lead author of the new research, warned that as plastic pollution increases more turtles are likely to become entangled.	The problem was highlighted in the final episode of the BBC's Blue Planet 2 series last Sunday, in which Sir David Attenborough drew attention to the turtle threat as he touchingly wished a baby leatherback luck on its journey into the Caribbean. Professor Brendan Godley, the lead author of the new research, warned that as plastic pollution increases more turtles are likely to become entangled. W…
NA	25	25.10	261				More than 1,000 marine turtles die every year after becoming entangled in rubbish in the oceans and on beaches, according to research.							"Plastic rubbish in the oceans, including lost or discarded fishing gear which is not biodegradable, is a major threat to marine turtles," he said. "We found, based on beach strandings, that more than 1,000 turtles are dying a year after becoming tangled up, but this is almost certainly a gross underestimate."														The research sheds light on the true threat of plastic pollution to marine turtles, which other research has shown also eat plastic rubbish and marine creatures caught up in it.				More than 1,000 marine turtles die every year after becoming entangled in rubbish in the oceans and on beaches, according to research.	Professor Brendan Godley, the lead author, warned that as plastic pollution increases more turtles are likely to become entangled.				The rise in plastic refuse is killing turtles of all species, with a disproportionate impact on hatchlings and young turtles.								Professor Brendan Godley, the lead author, warned that as plastic pollution increases more turtles are likely to become entangled.	Professor Brendan Godley, the lead author, warned that as plastic pollution increases more turtles are likely to become entangled.
PR	25	25.Marine turtles dying after becoming entangled	827				Hundreds of marine turtles die every year after becoming entangled in rubbish in the oceans and on beaches, including plastic 'six pack' holders and disgarded ~shing gear.							Hundreds of marine turtles die every year after becoming entangled in rubbish in the oceans and on beaches, including plastic 'six pack' holders and disgarded Fishing gear. "Plastic rubbish in the oceans, including lost or disgarded ~shing gear which is not biodegradable, is a major threat to marine turtles. We found, based on beach strandings, that more than 1 000 turtles are dying a year after …		Professor Godley, the lead author, said the mortality rate from becoming tangled up in human refuse was, in practice, likely to be far higher than 1 ,000 turtles a year estimated by the limited survey. Most entanglements recorded were in lost or discarded ~shing gear known as 'ghost ~shing' rope, nets and lines. Since the 1 950s the ~shing industry has replaced natural ~bres such as cotton, jute …					"Experts we surveyed found that entanglement in plastic and other pollution could pose a long term impact on the survival of some turtle populations and is a greater threat to them than oil spills. We need to cut the level of plastic waste and purse biodegradable alternatives if we are to tackle this grave threat to turtles' welfare."		"Experts we surveyed found that entanglement in plastic and other pollution could pose a long term impact on the survival of some turtle populations and is a greater threat to them than oil spills. We need to cut the level of plastic waste and purse biodegradable alternatives if we are to tackle this grave threat to turtles' welfare."	"Experts we surveyed found that entanglement in plastic and other pollution could pose a long term impact on the survival of some turtle populations and is a greater threat to them than oil spills. We need to cut the level of plastic waste and purse biodegradable alternatives if we are to tackle this grave threat to turtles' welfare."				The research, published in Endangered Species Research, sheds light on the true threat of plastic pollution to marine turtles, which, other research has shown, also eat plastic rubbish, and marine creatures caught up in it.					Professor Brendan Godley. Professor of Conservation Science and Director of the Centre for Ecology & Conservation at the University of Exeter's Penryn campus and the lead author warned that as plastic pollution increases more and more turtles are likely to become entangled.			The report concluded that, based on the survey results, that more than 1 000 turtles are likely to die due to entanglement. But the ~gure is likely to be a 'gross underestimation' of the scale of the threat to turtles. Not all dead turtles strand on beaches, especially young animals, and some decay at sea. "Experts we surveyed found that entanglement in plastic and other pollution could pose a lo…								But it points out some communities are actively working to rescue turtles that get tangled up. Fishermen in Sicily volunteer to take part in the rescue of turtles in di~culty at sea and on beaches, and are trained to transfer them to rescue centres.	Professor of Conservation Science and Director of the Centre for Ecology & Conservation at the University of Exeter's Penryn campus and the lead author warned that as plastic pollution increases more and more turtles are likely to become entangled.	Professor of Conservation Science and Director of the Centre for Ecology & Conservation at the University of Exeter's Penryn campus and the lead author warned that as plastic pollution increases more and more turtles are likely to become entangled. The Exeter University research team, which included two research students Emily Duncan and Zara Botterell who work in conjunction with Plymouth Marine…		Professor Godley, the lead author, said the mortality rate from becoming tangled up in human refuse was, in practice, likely to be far higher than 1 ,000 turtles a year estimated by the limited survey. "Experts we surveyed found that entanglement in plastic and other pollution could pose a long term impact on the survival of some turtle populations and is a greater threat to them than oil spills.…
NA	38	38.50	1254				The researchers maintain a global website, Covidlitter.com, where anyone can report animal and PPE incidents. Dispatches include sightings of a brown fur seal tangled in a face mask in Namibia; a mask-snarled puffin found dead on an Irish beach; and a sea turtle in Australia with a mask in its stomach. Environmentalists often rail on wet wipes, many of which snarl sewer systems when they are flus…									Loosed from pockets or heaped as infill, these are the flotsam of centuries lived on London's streets. "I find stuff because humans are litterbugs," Ms Maiklem said. "We've always been chucking things into the river." Dr Clardy suspects that some masks simply slip from wrists. "Once it falls on the ground, people probably look at it like, 'Huh, I'm not wearing that again'." "In stressful times, p…					In a paper published in Science of the Total Environment this year, Dr Thiel and 11 collaborators recommended that communities install more purpose-built receptacles, as well as signs reminding people to consider the landscape and their neighbours - human and otherwise. "We think there is more to the story than, 'just protect yourself'," said Dr Thiel, the paper's lead author.			In a paper published in Science of the Total Environment this year, Dr Thiel and 11 collaborators recommended that communities install more purpose-built receptacles, as well as signs reminding people to consider the landscape and their neighbours - human and otherwise. "We think there is more to the story than, 'just protect yourself'," said Dr Thiel, the paper's lead author.		LONDON (NYTIMES) - The River Thames, the tidal artery that squiggles through central London, holds up a mirror to life on dry land: scraggly remains of fir trees float by after Christmas; in the first days of a fresh year, bobbing Champagne bottles hint at recent revelry.		His accounts are not part of a formal project, but there are several such undertakings underway. In the Netherlands, Leiden University biologist Liselotte Rambonnet and Naturalis Biodiversity Centre biologist Auke-Florian Hiemstra keep a running count of masks and gloves littering streets and canals. They track animals' interactions with the castoff gear. Researchers in Canada recently estimated …					Loosed from pockets or heaped as infill, these are the flotsam of centuries lived on London's streets. "I find stuff because humans are litterbugs," Ms Maiklem said. "We've always been chucking things into the river."	Loosed from pockets or heaped as infill, these are the flotsam of centuries lived on London's streets. "I find stuff because humans are litterbugs," Ms Maiklem said. "We've always been chucking things into the river."						LONDON (NYTIMES) - The River Thames, the tidal artery that squiggles through central London, holds up a mirror to life on dry land: scraggly remains of fir trees float by after Christmas; in the first days of a fresh year, bobbing Champagne bottles hint at recent revelry. Ms Lara Maiklem, author of "Mudlark: In Search of London's Past Along the River Thames", scours the shoreline for items such a…			Loosed from pockets or heaped as infill, these are the flotsam of centuries lived on London's streets. "I find stuff because humans are litterbugs," Ms Maiklem said. "We've always been chucking things into the river." Dr Clardy suspects that some masks simply slip from wrists. "Once it falls on the ground, people probably look at it like, 'Huh, I'm not wearing that again'." "In stressful times, p…	Since January, volunteers with the Ocean Conservancy's International Coastal Cleanup have plucked 109,507 pieces of PPE from the world's watery margins. Cleanup efforts are also underway in London, where staff members and volunteers with the environmental group Thames21 count and collect rubbish from the river's banks. In September, the group closely surveyed more than 1km of shoreline and found …		Ms Lara Maiklem, author of "Mudlark: In Search of London's Past Along the River Thames", scours the shoreline for items such as coins, tokens, buckles and potsherds, some dating to the period of Roman rule. Since January, volunteers with the Ocean Conservancy's International Coastal Cleanup have plucked 109,507 pieces of PPE from the world's watery margins. Now, across the litter-strewn planet, s…	Researchers in Nanjing, China, and La Jolla, California, recently calculated that 193 countries have generated more than 8 million tonnes of pandemic-related plastic waste, and the advocacy group OceansAsia estimated that as many as 1.5 billion face masks could wind up in the marine environment in a single year.
NA	38	38.2	376				While the toll exacted on the environment by PPE may seem grim, pandemic-related waste is a literal drop in the ocean compared to the overall problem of plastic pollution, accounting for just 1.5% of all plastics entering the oceans from rivers.							The latest study, however, identifies the source and destinations of most of this waste. Hospitals account for nearly 90% of discarded PPE, with individuals responsible for only 7%. The majority of the waste (79%) enters the global ocean via just 10 rivers.	Once in the ocean, most of this waste remains close to its source, with East and South Asia, South Africa, and the Caribbean identified as hotspots. 13 percent floats in the seawater, 16% sinks to the seabed, and 71% is washed up on the shore.									With an estimated 129 billion face masks and 65 billion gloves used globally each month, scientists have already called for the use of more environmentally friendly materials in the production of PPE.			The Arctic Ocean has also been identified as a final resting place for some of this trash, and the researchers warned that this area deserves "special concern" due to its already high sensitivity to climate change.					"The recent Covid-19 pandemic has led to an increased demand for single-use plastic, intensifying pressure on this already out-of-control problem," a team of Chinese and American researchers wrote in a paper published by the US National Academy of Sciences. "More than eight million tons of pandemic-associated plastic waste have been generated globally, with more than 25,000 tons entering the glob…	"The recent Covid-19 pandemic has led to an increased demand for single-use plastic, intensifying pressure on this already out-of-control problem," a team of Chinese and American researchers wrote in a paper published by the US National Academy of Sciences. "More than eight million tons of pandemic-associated plastic waste have been generated globally, with more than 25,000 tons entering the glob…	The researchers warned that as "the pandemic will not be completely controlled in a couple of years," a further 34,000 tons of discarded PPE will end up in the oceans, with much of it adding to huge "garbage patches" in the North and South Atlantic and Pacific Oceans, as well as the Indian Ocean. The Arctic Ocean has also been identified as a final resting place for some of this trash, and the re…				While the toll exacted on the environment by PPE may seem grim, pandemic-related waste is a literal drop in the ocean compared to the overall problem of plastic pollution, accounting for just 1.5% of all plastics entering the oceans from rivers.							The researchers warned that as "the pandemic will not be completely controlled in a couple of years," a further 34,000 tons of discarded PPE will end up in the oceans, with much of it adding to huge "garbage patches" in the North and South Atlantic and Pacific Oceans, as well as the Indian Ocean. The Arctic Ocean has also been identified as a final resting place for some of this trash, and the re…
NA	38	38.35	574				“The released plastics can be transported over long distances in the ocean, encounter marine wildlife, and potentially lead to injury or even death,” they added.							“Most of the plastic is from medical waste generated by hospitals that dwarfs the contribution from personal protection equipment and online-shopping package material,” they wrote.	The mismanaged plastic waste, consisting of personal protective equipment such as masks and gloves, vastly exceeded the capability of countries to process it properly, researchers said. The Chinese study found that 46% of the mismanaged plastic waste came from Asia, due to the high level of mask-wearing by individuals there, followed by Europe, 24%, and North and South America, 22%.					The authors said the findings showed better medical waste management was needed in pandemic epicenters, especially in developing countries.				The authors said the findings showed better medical waste management was needed in pandemic epicenters, especially in developing countries.		A study in March presented the first case of a fish entrapped in a medical glove, encountered during a canal cleanup in Leiden, the Netherlands. In Brazil a PFF-2 protective mask was found in the stomach of a dead Magellanic penguin.		A study in March presented the first case of a fish entrapped in a medical glove, encountered during a canal cleanup in Leiden, the Netherlands. In Brazil a PFF-2 protective mask was found in the stomach of a dead Magellanic penguin.				Plastic waste from the Covid-19 pandemic weighing 25,900 tonnes, equivalent to more than 2,000 double decker buses, has leaked into the ocean, research has revealed. The mismanaged plastic waste, consisting of personal protective equipment such as masks and gloves, vastly exceeded the capability of countries to process it properly, researchers said.	Peng and Wu said their research suggested 87.4% of the excess waste was from hospitals, rather than from individual use. PPE usage by individuals contributed only 7.6% of the total, while packaging and test kits accounted for 4.7% and 0.3% respectively.	Plastic waste from the Covid-19 pandemic weighing 25,900 tonnes, equivalent to more than 2,000 double decker buses, has leaked into the ocean, research has revealed.				Plastic waste from the Covid-19 pandemic weighing 25,900 tonnes, equivalent to more than 2,000 double decker buses, has leaked into the ocean, research has revealed. The mismanaged plastic waste, consisting of personal protective equipment such as masks and gloves, vastly exceeded the capability of countries to process it properly, researchers said. The authors said the findings showed better med…											“The released plastics can be transported over long distances in the ocean, encounter marine wildlife, and potentially lead to injury or even death,” they added. “Most of the plastic is from medical waste generated by hospitals that dwarfs the contribution from personal protection equipment and online-shopping package material,” they wrote. “This poses a long-lasting problem for the ocean environ…
NA	38	38.37	249				“The released plastics can be transported over long distances in the ocean, encounter marine wildlife, and potentially lead to injury or even death,” the study added of the harmful nature of so much plastic infiltrating the ocean. Another report published last month indicated that the U.S. plastics industry’s contribution to climate change was on track to pass coal by 2030 in terms of negative en…							The research also noted that most of the plastic was largely the result of medical waste from hospitals as opposed to from personal protection equipment and online-shopping packaging.	Personal protective equipment like masks and gloves from the COVID-19 pandemic were mismanaged as there was too much waste for countries to properly process the materials, according to a study entitled “Plastic waste release caused by COVID-19 and its fate in the global ocean” published in the online journal PNAS.									The researchers also called for “better medical waste management in pandemic epicenters, especially in developing countries.”		Another report published last month indicated that the U.S. plastics industry’s contribution to climate change was on track to pass coal by 2030 in terms of negative environmental impact.	Another report published last month indicated that the U.S. plastics industry’s contribution to climate change was on track to pass coal by 2030 in terms of negative environmental impact.	Another report published last month indicated that the U.S. plastics industry’s contribution to climate change was on track to pass coal by 2030 in terms of negative environmental impact.		Personal protective equipment like masks and gloves from the COVID-19 pandemic were mismanaged as there was too much waste for countries to properly process the materials, according to a study entitled “Plastic waste release caused by COVID-19 and its fate in the global ocean” published in the online journal PNAS.		A recent study found that more than 25,000 tons of pandemic-related plastic waste leaked into the ocean while 8 million tons of plastic waste were created globally.	The researchers also called for “better medical waste management in pandemic epicenters, especially in developing countries.”				“The COVID-19 pandemic has led to an increased demand for single-use plastics that intensifies pressure on an already out-of-control global plastic waste problem,” the study said. “While it is suspected to be large, the magnitude and fate of this pandemic-associated mismanaged plastic waste are unknown.” “The released plastics can be transported over long distances in the ocean, encounter marine …
NA	38	38.38	465				All of that waste can cause marine life to get entangled, trapped and can even ingest COVID-19 plastic waste. Some animals have even died from it, with one penguin found in Brazil to have died from ingesting an adult protective mask. Another fish found in the Netherlands was found stuck in a plastic medical glove.							In a new report, researchers from China and California found that most plastic waste came from hospitals, through medical waste, test kits, surgical protective equipment, N95 masks and packaging. Plastics are unique in that they are durable and inexpensive, making them the easiest material to use for most disposable medical tools, equipment and packaging. Researchers confirmed that despite the ra…	• The world’s COVID-19 epicenters, like the U.S. and China, were the biggest culprits of mismanaged plastic medical waste. Parts of the world that were considered COVID-19 epicenters, like the U.S. and China, had the most mismanaged plastic waste. Researchers found that used PPE in these countries were not always properly handled or recycled, which ultimately led to an excess of plastic waste tha…						Earlier in the year, the U.S. Environmental Protection Agency released a statement urging Americans to recycle and properly dispose of used PPE. Used face masks, disinfectant wipes, gloves and other PPE should be kept out of recycling bins.			The report suggested that public awareness of the environmental impact of PPE and other plastic products needs to be increased at a global level. It also encouraged a stronger effort to create innovative technologies for better plastic waste collection, classification, treatment, and recycling, as well as the development of more environmentally friendly materials.								• Researchers calculated that up to eight million tons of pandemic-associated plastic waste was created globally. • Most of that waste ends up in the oceans, polluting waters and endangering marine animals. • The world’s COVID-19 epicenters, like the U.S. and China, were the biggest culprits of mismanaged plastic medical waste.	• Researchers calculated that up to eight million tons of pandemic-associated plastic waste was created globally.				All of that waste can cause marine life to get entangled, trapped and can even ingest COVID-19 plastic waste. Some animals have even died from it, with one penguin found in Brazil to have died from ingesting an adult protective mask. Another fish found in the Netherlands was found stuck in a plastic medical glove.									In a new report, researchers from China and California found that most plastic waste came from hospitals, through medical waste, test kits, surgical protective equipment, N95 masks and packaging. Plastics are unique in that they are durable and inexpensive, making them the easiest material to use for most disposable medical tools, equipment and packaging. Earlier in the year, the U.S. Environment…
NA	38	38.4	657		‘The plastic debris could also facilitate species invasion and transport of contaminants including the COVID-19 virus,’ said the study.		This mismanaged plastic waste is then discharged into the environment, and a portion reaches the ocean. These plastics can be transported over long distances in the ocean, potentially causing injuries and even death in marine wildlife. As of July, there were 61 recorded instances of animals being killed or injured due to pandemic-related plastic waste, according to a Dutch tracking project. ‘The …							The researchers estimate that about 87% of the waste came from hospitals — not individuals — and that countries are not able to handle and efficiently process the tremendous amount of plastic waste.	The study by a group of researchers based in China and the United States, found that 46% of the mismanaged plastic waste came from Asia, due to the high level of mask-wearing by individuals there, followed by Europe at 24% and North and South America at 22% The researchers estimate that about 87% of the waste came from hospitals — not individuals — and that countries are not able to handle and ef…			Advocacy groups urged governments to spread public information campaigns regarding the proper collection and management of pandemic-related plastic waste and their judicial use.					Advocacy groups urged governments to spread public information campaigns regarding the proper collection and management of pandemic-related plastic waste and their judicial use.	Better medical waste management in pandemic epicenters, especially in developing countries is also needed to mitigate the threat to our oceans.				As of July, there were 61 recorded instances of animals being killed or injured due to pandemic-related plastic waste, according to a Dutch tracking project. A study in March presented the first case of a fish entrapped in a medical glove, encountered during a canal cleanup in Leiden, the Netherlands. In Brazil, a protective mask was found in the stomach of a dead Magellanic penguin.				Plastic waste generation soared due to hospital waste and the use of PPEs during the pandemic — most of it ending up in the oceans. According to a new study, 25,900 tonnes of ‘pandemic-associated plastic waste’ has found their way into the oceans, according to a report published on Monday.	The researchers estimate that about 87% of the waste came from hospitals — not individuals — and that countries are not able to handle and efficiently process the tremendous amount of plastic waste.			‘The COVID-19 pandemic has led to an increased demand for single-use plastics that intensifies pressure on an already out-of-control global plastic waste problem,’ the researchers explained in the article. The boom in plastic pollution amid heightened use of personal protective equipment (PPE) and the rapid growth in online shopping were expected to have drastic negative effects on the environmen…										Advocacy groups urged governments to spread public information campaigns regarding the proper collection and management of pandemic-related plastic waste and their judicial use.
NA	38	38.47	630		The accidental ingestion of these micro-/nano-plastics by marine and freshwater organisms, alongside unexpected accumulation in terrestrial plants and animals, and transport in the atmosphere as “plastic-rain” or “plastic-smog,” raise concerns for the safety of human food, drinking water and breathable air.		Plastic products, especially personal protective equipment (PPE) such as masks and gloves, may have played significant roles in protecting humans from Covid-19, but these are leaving the land and marine life gasping for breath, with a report revealing that more than 25,000 tons of pandemic-associated waste is entering the global ocean. “The released plastics can be transported over long distances…							Peng and Wu said their research suggested 87.4% of the excess waste was from hospitals, rather than from individual use. PPE usage by individuals contributed only 7.6% of the total, while packaging and test kits accounted for 4.7% and 0.3% respectively. “Most of the plastic is from medical waste generated by hospitals that dwarfs the contribution from personal protection equipment and online-shop…	The Chinese study found that 46% of the mismanaged plastic waste came from Asia, due to the high level of mask-wearing by individuals there, followed by Europe, 24%, and North and South America, 22%.									“This (medical waste) poses a long-lasting problem for the ocean environment and is mainly accumulated on beaches and coastal sediments. We call for better medical waste management in pandemic epicenters, especially in developing countries. The authors said the findings showed better medical waste management was needed in pandemic epicenters, especially in developing countries.		This medical waste is in addition to the daily plastic waste created by the consumption of plastic packaging by takeaway services, e-commerce outlets and express delivery industries increased extensively with social distancing requirements necessitated in pandemic times. For instance, takeaway and home delivery services generated an additional 1.21 Mt of plastic waste from April to May 2020 durin…		A study in March presented the first case of a fish entrapped in a medical glove, encountered during a canal cleanup in Leiden, the Netherlands. In Brazil a PFF-2 protective mask was found in the stomach of a dead Magellanic penguin. Yet another article published in Nature Reviews Earth & Environment has said that approximately 400 Mt of plastic waste was produced globally in 2019. “However, the …				Plastic products, especially personal protective equipment (PPE) such as masks and gloves, may have played significant roles in protecting humans from Covid-19, but these are leaving the land and marine life gasping for breath, with a report revealing that more than 25,000 tons of pandemic-associated waste is entering the global ocean.	“The Covid-19 pandemic has led to an increased demand for single-use plastics that intensifies pressure on an already out-of-control global plastic waste problem,” said Yiming Peng and Peipei Wu from Nanjing University, the authors of Magnitude and impact of pandemic-associated plastic waste.	Plastic products, especially personal protective equipment (PPE) such as masks and gloves, may have played significant roles in protecting humans from Covid-19, but these are leaving the land and marine life gasping for breath, with a report revealing that more than 25,000 tons of pandemic-associated waste is entering the global ocean.		Plastic products, especially personal protective equipment (PPE) such as masks and gloves, may have played significant roles in protecting humans from Covid-19, but these are leaving the land and marine life gasping for breath, with a report revealing that more than 25,000 tons of pandemic-associated waste is entering the global ocean. The accidental ingestion of these micro-/nano-plastics by mar…										“The Covid-19 pandemic has led to an increased demand for single-use plastics that intensifies pressure on an already out-of-control global plastic waste problem,” said Yiming Peng and Peipei Wu from Nanjing University, the authors of Magnitude and impact of pandemic-associated plastic waste.			“The released plastics can be transported over long distances in the ocean, encounter marine wildlife, and potentially lead to injury or even death,” they added.
NA	38	38.55	633	2			The Arctic ecosystem is already considered to be particularly vulnerable due to the harsh environment and high sensitivity to climate change, they said.The researchers called for global public awareness of the environmental impact of personal protection equipment (PPE) and other plastic products.							They incorporated data from the start of the pandemic in 2020 through August 2021, finding that most of the global plastic waste entering the ocean is coming from Asia, with hospital waste representing the bulk of the land discharge.	They incorporated data from the start of the pandemic in 2020 through August 2021, finding that most of the global plastic waste entering the ocean is coming from Asia, with hospital waste representing the bulk of the land discharge.					To combat the influx of plastic waste into the oceans, the researchers urge for better management of medical waste in epicentres, especially in developing countries.				To combat the influx of plastic waste into the oceans, the researchers urge for better management of medical waste in epicentres, especially in developing countries. The researchers called for global public awareness of the environmental impact of personal protection equipment (PPE) and other plastic products. The also emphasised on the development of innovative technologies for better plastic wa…			The Arctic ecosystem is already considered to be particularly vulnerable due to the harsh environment and high sensitivity to climate change, they said.					Los Angeles, November 10 The Covid-19 pandemic has generated more than eight million tonnes of plastic waste globally, with over 25,000 tonnes of it entering the oceans, according to a study.	The Nanjing University MITgcm-plastic model (NJU-MP) used in the study works like “a virtual reality,” said Yanxu Zhang, the corresponding author and a professor at Nanjing University.	A smaller portion will go into the open ocean, eventually to be trapped in the centres of ocean basins, which can become garbage patches, and accumulate in the Arctic Ocean. The Nanjing University MITgcm-plastic model (NJU-MP) used in the study works like “a virtual reality,” said Yanxu Zhang, the corresponding author and a professor at Nanjing University.				Los Angeles, November 10 The Covid-19 pandemic has generated more than eight million tonnes of plastic waste globally, with over 25,000 tonnes of it entering the oceans, according to a study. The research, published in the journal Proceedings of the National Academy of Sciences, found that a significant portion of this ocean plastic debris is expected to make its way onto either beaches or the se…								The resulting waste, some of which ends up in rivers and oceans, is intensifying pressure on an already out-of-control global plastic problem, they said. The team led by researchers at Nanjing University in China and University of California (UC) San Diego, US, used a newly developed ocean plastic numerical model to quantify the impact of the pandemic on plastic discharge from land sources. The s…			The study stresses on the need for better management of medical waste in developing countries. “When we started doing the math, we were surprised to find that the amount of medical waste was substantially larger than the amount of waste from individuals, and a lot of it was coming from Asian countries, even though that’s not where most of the Covid-19 cases were,” said study co-author Amina Schar…
NA	38	38.10	630	2	The debris could also encourage the introduction of invasive species in certain regions and the distribution of contaminants, such as the coronavirus itself.		Not all personal protective equipment such as masks and gloves are recyclable, and their presence in oceans increases the likelihood marine life becomes tangled or trapped in the waste. Animals can also die by eating plastic, researchers say. The debris could also encourage the introduction of invasive species in certain regions and the distribution of contaminants, such as the coronavirus itself.						A recent report estimated that 1.5 million face masks entered the oceans in 2020 alone — a feat made easy by the relaxation of single-use plastic legislation across the globe.	The majority of the junk is coming directly from hospitals, researchers from the University of California, San Diego’s Scripps Institution of Oceanography and Nanjing University in China said.	The pandemic has amounted to an unprecedented demand for single-use plastics, which treatment systems around the globe are failing to keep up with, particularly in developing countries, the team said. About 72% of global plastic waste from the COVID-19 pandemic is from Asia, with the Shatt al-Arab, Indus and Yangtze rivers contributing most to the plastic discharge. European rivers account for 11…									“To solve it requires a lot of technical renovation, transition of economy, and change of lifestyle.” A recent report estimated that 1.5 million face masks entered the oceans in 2020 alone — a feat made easy by the relaxation of single-use plastic legislation across the globe.			Researchers say the potential impacts of the new trash add ”another layer of concern” given the harsh Arctic environment is already vulnerable to climate change.	A recent report estimated that 1.5 million face masks entered the oceans in 2020 alone — a feat made easy by the relaxation of single-use plastic legislation across the globe.				Forget the hungry seagulls; plastic waste from the COVID-19 pandemic, including masks, gloves and face shields, may ruin your future beach days instead. New research estimates the pandemic has generated more than 8 million tons of plastic pollution globally, with more than 25,000 of those tons already dumped in oceans via rivers worldwide. The majority of the junk is coming directly from hospital…	Forget the hungry seagulls; plastic waste from the COVID-19 pandemic, including masks, gloves and face shields, may ruin your future beach days instead. New research estimates the pandemic has generated more than 8 million tons of plastic pollution globally, with more than 25,000 of those tons already dumped in oceans via rivers worldwide. The majority of the junk is coming directly from hospital…	A smaller portion of plastic trash is expected to float into open water and wash up in the Arctic Ocean, informally known as the “dead-end” for pollution thanks to circulation patterns.			Forget the hungry seagulls; plastic waste from the COVID-19 pandemic, including masks, gloves and face shields, may ruin your future beach days instead. New research estimates the pandemic has generated more than 8 million tons of plastic pollution globally, with more than 25,000 of those tons already dumped in oceans via rivers worldwide. The majority of the junk is coming directly from hospital…
PR	38	38.New study pinpoints likely path of COVID-rela	914				The Arctic ecosystem is already considered to be particularly vulnerable due to the harsh environment and high sensitivity to climate change. The potential ecological impacts of exposure to accumulated Arctic plastics adds another layer of concern, said the researchers.							The researchers incorporated data from the start of the pandemic in 2020 through August 2021 , ~nding that most of the global plastic waste entering the ocean is coming from Asia, with hospital waste representing the bulk of the land discharge. The study reveals the need for better management of medical waste in developing countries.	The researchers incorporated data from the start of the pandemic in 2020 through August 2021 , ~nding that most of the global plastic waste entering the ocean is coming from Asia, with hospital waste representing the bulk of the land discharge. The study reveals the need for better management of medical waste in developing countries. Asian rivers account for 73 percent of the total discharge of p…					The researchers incorporated data from the start of the pandemic in 2020 through August 2021 , ~nding that most of the global plastic waste entering the ocean is coming from Asia, with hospital waste representing the bulk of the land discharge. The study reveals the need for better management of medical waste in developing countries.				To combat the in~ux of plastic waste into the oceans, the authors urge for better management of medical waste in epicenters, especially in developing countries. They also called for global public awareness of the environmental impact of personal protection equipment (PPE) and other plastic products, and the development of innovative technologies for better plastic waste collection, classi~cation,…			The Arctic ecosystem is already considered to be particularly vulnerable due to the harsh environment and high sensitivity to climate change. The potential ecological impacts of exposure to accumulated Arctic plastics adds another layer of concern, said the researchers.					Around the world, the COVID-1 9 pandemic has led to an increased demand for single-use plastics such as face masks, gloves, and face shields. The resulting waste, some of which ends up in rivers and oceans, is intensifying pressure on an already out-of-control global plastic problem. While many researchers suspect there will be a massive in~ux of COVID-related mismanaged plastic waste, a new stud…	Around the world, the COVID-1 9 pandemic has led to an increased demand for single-use plastics such as face masks, gloves, and face shields. The resulting waste, some of which ends up in rivers and oceans, is intensifying pressure on an already out-of-control global plastic problem. While many researchers suspect there will be a massive in~ux of COVID-related mismanaged plastic waste, a new stud…	Devised by the research team, the Nanjing University MITgcm-plastic model (NJU-MP) used in this study works like “a virtual reality,” explained Yanxu Zhang, the corresponding author and a professor at the School of Atmospheric Sciences at Nanjing University. He said the model was built based on Newton’s laws of motion and the law of conservation of mass. While most of the pandemic-associated plas…			Around the world, the COVID-1 9 pandemic has led to an increased demand for single-use plastics such as face masks, gloves, and face shields. The resulting waste, some of which ends up in rivers and oceans, is intensifying pressure on an already out-of-control global plastic problem. While many researchers suspect there will be a massive in~ux of COVID-related mismanaged plastic waste, a new stud…											“When we started doing the math, we were surprised to ~nd that the amount of medical waste was substantially larger than the amount of waste from individuals, and a lot of it was coming from Asian countries, even though that's not where most of the COVID-1 9 cases were,” said study co-author Amina Schartup, an assistant professor at Scripps Oceanography. “The biggest sources of excess waste were …
NA	42	42.1	469				Their concern is that the plastic could help carry invasive species.	The researchers, who published their findings in the journal Nature Communications, initially embarked on the research in the wake of that devastating tsunami.			"Plastics are more permanent than much of the natural debris previously seen in the open ocean. They are creating a more permanent habitat in this area," says Linsey Haram of the Smithsonian Environmental Research Center, who leads the study.														"More than half of the items had coastal species," he said. "That raises a lot of questions about what it means to be a coastal species."			An earlier study estimated that a total of 25 billion tonnes of plastic waste would be generated by 2050.				A group of scientists have discovered marine animals living among plastic debris in an area of the open ocean called the "Great Pacific Garbage Patch".	A group of scientists have discovered marine animals living among plastic debris in an area of the open ocean called the "Great Pacific Garbage Patch".	Scientists have discovered marine animals living on plastic debris in an area of the open ocean dubbed "the Great Pacific Garbage Patch". A group of scientists have discovered marine animals living among plastic debris in an area of the open ocean called the "Great Pacific Garbage Patch". "All sorts of things end up there," Dr Haram said. "It's not an island of plastic, but there's definitely a l…				A group of scientists have discovered marine animals living among plastic debris in an area of the open ocean called the "Great Pacific Garbage Patch".								A group of scientists have discovered marine animals living among plastic debris in an area of the open ocean called the "Great Pacific Garbage Patch". Haram worked with the Ocean Voyages Institute, an NGO that conducts expeditions to collect plastic pollution, and oceanographers at the University of Hawaii at Manoa.			"Plastics are more permanent than much of the natural debris previously seen in the open ocean. They are creating a more permanent habitat in this area," says Linsey Haram of the Smithsonian Environmental Research Center, who leads the study. "All sorts of things end up there," Dr Haram said. "It's not an island of plastic, but there's definitely a lot of plastic there." "We want to understand ho…
NA	42	42.11	470	1			Scientists are concerned that plastic may help transport invasive species.	The researchers, who reported their findings in the journal Nature Communications, initially embarked on the investigation following that devastating tsunami.			Scientists have discovered marine animals living on plastic debris in an area of the open ocean dubbed "the Great Pacific Garbage Patch". Many of the creatures are coastal species, living miles from their usual habitats, on a patch halfway between the coast of California and Hawaii. They're creating a more permanent habitat in this area." Some of the organisms the researchers found on the plastic…																	One previous study estimated that a total of 25,000 million tonnes of plastic waste would be generated by 2050.				Scientists have discovered marine animals living on plastic debris in an area of the open ocean dubbed "the Great Pacific Garbage Patch".	Scientists have discovered marine animals living on plastic debris in an area of the open ocean dubbed "the Great Pacific Garbage Patch".	"All sorts of stuff ends up out there," said Dr Haram. "It's not an island of plastic, but there's definitely a large amount of plastic corralled there." Some of the organisms the researchers found on the plastic items they examined were open-ocean species - organisms that survive by "rafting" on floating debris. But the most eye-opening finding, Dr Haram said, was the diversity of coastal specie…				The scientists said the discovery highlighted another "unintended consequence" of plastic pollution - a problem only expected to grow. One previous study estimated that a total of 25,000 million tonnes of plastic waste would be generated by 2050.								Dr Haram worked with the Ocean Voyages Institute, a charity that collects plastic pollution on sailing expeditions, and with oceanographers from the University of Hawaii at Manoa.			Lead researcher Dr Linsey Haram, who carried out the work at the Smithsonian Environmental Research Centre, said: "Plastics are more permanent than many of the natural debris that you previously have seen in the open ocean. They're creating a more permanent habitat in this area." Dr Haram worked with the Ocean Voyages Institute, a charity that collects plastic pollution on sailing expeditions, an…
NA	42	42.4	450				In addition to transporting non-native species to delicate habitats where they may become invasive and destructive, neopelagic communities are "basically an ecological trap" says Alava. That's because the sheer density of plastic in the ocean (researchers expect 600m metric tons of garbage will collect in the ocean by 2040) leads to the creation of permanent floating structures, covered in small …	A decade ago, marine researchers believed coastal organisms, which evolved to live along sheltered shorelines, could not survive a trip across the inhospitable open ocean. Yet Japan's 2011 tsunami, which sent some 300 species of Asian marine life riding durable and buoyant plastic garbage onto North American shores, disproved that assumption.			Masses of ocean plastic are providing artificial habitat for otherwise coastal species, according to a new study published in the peer-reviewed journal, Nature Communications. Now, researchers have a term for these drifters: "neopelagic communities", seafaring colonies of anemones, brittle stars, shrimp, barnacles and more, which are thriving on plastic in the Great Pacific Garbage Patch and wash…												"The 2021 UN report after Cop26 was clear that the scale of rapidly increasing plastic pollution is putting the health of all the world's oceans and seas at risk," says Alava.					"The 2021 UN report after Cop26 was clear that the scale of rapidly increasing plastic pollution is putting the health of all the world's oceans and seas at risk," says Alava.				Masses of ocean plastic are providing artificial habitat for otherwise coastal species, according to a new study published in the peer-reviewed journal, Nature Communications.	The study's authors observed floating water bottles, old toothbrushes and matted fishing nets. The possibility exists that species may be evolving to better adapt to life on plastic.	Now, researchers have a term for these drifters: "neopelagic communities", seafaring colonies of anemones, brittle stars, shrimp, barnacles and more, which are thriving on plastic in the Great Pacific Garbage Patch and washing up wherever the currents take them.			"The 2021 UN report after Cop26 was clear that the scale of rapidly increasing plastic pollution is putting the health of all the world's oceans and seas at risk," says Alava.								"The 2021 UN report after Cop26 was clear that the scale of rapidly increasing plastic pollution is putting the health of all the world's oceans and seas at risk," says Alava.	The study's authors observed floating water bottles, old toothbrushes and matted fishing nets. The possibility exists that species may be evolving to better adapt to life on plastic. and destructive, neopelagic communities are "basically an ecological trap" says Alava.
NA	42	42.17	407	7			In dit onderzoek wordt wel gezegd dat dieren mee liften maar het is niet duidelijk of dit ook een biologisch probleem is. Daarom is deze niet als biologisch probleem gecodeerd.	The ability of coastal species to ride on plastic to survive in the open ocean for long periods was highlighted after the 2011 Japanese tsunami. Nearly 300 species were found to have made it across the Pacific, to be washed up on the west coast of North America. Many survived on their rafts for several years.			A new study describes how the rubbish, which covers 610,000 square miles of ocean, has been colonised by animals and plants that would normally be found on the coast. They include crabs, Asian anemones, marine worms, sea stars and sponges. Evidence that these creatures are thriving thousands of miles from their usual habitats has upended the long-standing assumption that the open ocean is an impa…					It is a vast monument to human carelessness: a floating layer of plastic debris more than three times the size of France. But for a growing number of organisms the "Great Pacific garbage patch" is something else - their home.																	It is a vast monument to human carelessness: a floating layer of plastic debris more than three times the size of France. But for a growing number of organisms the "Great Pacific garbage patch" is something else - their home.	It is a vast monument to human carelessness: a floating layer of plastic debris more than three times the size of France. But for a growing number of organisms the "Great Pacific garbage patch" is something else - their home.				It is a vast monument to human carelessness: a floating layer of plastic debris more than three times the size of France. But for a growing number of organisms the "Great Pacific garbage patch" is something else - their home. The results have triggered more questions: not least, what are these animals eating? "The open ocean has not been habitable for coastal organisms until now," Greg Ruiz, of t…
NA	42	42.23	292				While this could be seen as an unexpected upside of ocean plastic pollution, researchers warn it could also be storing up problems as it is unclear how the new residents are interacting with existing open water species. However, the open ocean has plenty of its own native species, which also colonise floating debris. The arrival of new coastal neighbors could disrupt ocean ecosystems that have re…				As such, ocean plastic is creating new communities of life on the high seas. It is “creating opportunities for coastal species’ biogeography to greatly expand beyond what we previously thought was possible,” said Linsey Haram, of the American Association for the Advancement of Science.																					Coastal species such as crabs, shrimp and barnacles are being transported to the open oceans on plastic debris in vast numbers where they can live for years, according to a study.	Researchers have found evidence of anemones, crustaceans, jellyfish and other coastal species growing on rubbish hundreds of miles out to sea in the North Pacific Subtropical Gyre.	More commonly known as the “Great Pacific Garbage Patch”, this ocean rubbish dump has an estimated 79,000 tons of plastic floating in an area of 610,000 square miles between California and Hawaii.			While this could be seen as an unexpected upside of ocean plastic pollution, researchers warn it could also be storing up problems as it is unclear how the new residents are interacting with existing open water species. However, the open ocean has plenty of its own native species, which also colonise floating debris. The arrival of new coastal neighbors could disrupt ocean ecosystems that have re…								While this could be seen as an unexpected upside of ocean plastic pollution, researchers warn it could also be storing up problems as it is unclear how the new residents are interacting with existing open water species.
NA	42	42.6	602				Their concern is that the plastic could help carry invasive species.	Much of it is microplastic, very hard to identify with the naked eye.But there are also larger items, including abandoned fishing nets, buoys and even boats that have been floating in the gyre since the tsunami that hit Japan in 2011. The researchers, who published their findings in the journal Nature Communications, initially embarked on the research in the wake of that devastating tsunami.			They are creating a more permanent habitat in this area," says Linsey Haram of the Smithsonian Environmental Research Center, who leads the study. Haram worked with the Ocean Voyages Institute, an NGO that conducts expeditions to collect plastic pollution, and oceanographers at the University of Hawaii at Manoa.														"More than half of the items had coastal species," he said. "That raises a lot of questions about what it means to be a coastal species."			An earlier study estimated that a total of 25 billion tonnes of plastic waste would be generated by 2050.				A group of scientists have discovered marine animals living among plastic debris in an area of the open ocean called the "Great Pacific Garbage Patch".	A group of scientists have discovered marine animals living among plastic debris in an area of the open ocean called the "Great Pacific Garbage Patch".	A group of scientists have discovered marine animals living among plastic debris in an area of the open ocean called the "Great Pacific Garbage Patch". "All sorts of things end up there," Dr Haram said. "It's not an island of plastic, but there's definitely a lot of plastic there."				Scientists said the discovery highlighted another "unintended consequence" of plastic pollution, a problem that is expected to grow. An earlier study estimated that a total of 25 billion tonnes of plastic waste would be generated by 2050.											"Plastics are more permanent than much of the natural debris previously seen in the open ocean. They are creating a more permanent habitat in this area," says Linsey Haram of the Smithsonian Environmental Research Center, who leads the study. "All sorts of things end up there," Dr Haram said. "It's not an island of plastic, but there's definitely a lot of plastic there." "We want to understand ho…
NA	42	42.7	752				The scientists studying this phenomenon have warned that this rapid change could upend ecosystems which have been stable for thousands of years. A key concern is the impact the new plastic-rafting species may have on the marine environments they now find themselves in. The scientists said "the arrival of new coastal neighbours could disrupt ocean ecosystems that have remained undisturbed for mill…	Cumulative global plastic waste could reach over 25 billion metric tons by 2050, and with fiercer and more frequent storms on the horizon caused by the worsening climate crisis, the authors said they expect even more of plastic will get pushed out to sea.			After picking up more than 100 tonnes of plastic which was then analysed, they discovered coastal species including anemones, hydroids and shrimp-like amphipods, not only surviving, but thriving, on marine plastic hundreds of miles from their usual coastline environments. "The open ocean has not been habitable for coastal organisms until now," said Serc senior scientist Greg Ruiz, who leads the M…				The research comes as new figures from the US's National Academies of Sciences, Engineering and Medicine warns the US has the world's highest level of plastic waste per capita. The country generated 42 million metric tonnes of plastic waste in 2016, working out to around 130 kg per person per year.	The authors said increasing our understanding of the impact on ecosystems was increasingly important as humanity's burden on the natural world grows.											Cumulative global plastic waste could reach over 25 billion metric tons by 2050, and with fiercer and more frequent storms on the horizon caused by the worsening climate crisis, the authors said they expect even more of plastic will get pushed out to sea.	The research comes as new figures from the US's National Academies of Sciences, Engineering and Medicine warns the US has the world's highest level of plastic waste per capita. The country generated 42 million metric tonnes of plastic waste in 2016, working out to around 130 kg per person per year.				begint niet in de eerste twee alinea's met het onderzoek aanhalen ook al komt de info wel uit het onderzoek.	The scientists studying this phenomenon have warned that this rapid change could upend ecosystems which have been stable for thousands of years.	Scientists studied the species living among the plastic debris in the North Pacific Subtropical Gyre, more commonly known as the "Great Pacific Garbage Patch". The world now has at least five giant plastic-infested gyres, or "garbage patches", spiralling around its oceans. The Great Pacific Garbage Patch between California and Hawaii, holds the most floating plastic, with an estimated 79,000 metr…			The scientists studying this phenomenon have warned that this rapid change could upend ecosystems which have been stable for thousands of years. A key concern is the impact the new plastic-rafting species may have on the marine environments they now find themselves in.								The scientists studying this phenomenon have warned that this rapid change could upend ecosystems which have been stable for thousands of years.				"The open ocean has not been habitable for coastal organisms until now," said Serc senior scientist Greg Ruiz, who leads the Marine Invasions Lab where Dr Haram worked. He said this was "partly because of habitat limitation, there wasn't plastic there in the past, and partly, we thought, because it was a food desert."
NA	42	42.8	144								As a result, ocean plastic is creating new communities of life on the high seas "creating opportunities for coastal species' biogeography to greatly expand beyond what we previously thought was possible," said Linsey Haram, of the American Association for the Advancement of Science. This could be seen as an upside of pollution but researchers warn it's unclear how the new residents are interactin…																					Coastal species such as crabs and shrimp and barnacles are being transported to the open oceans on plastic debris in vast numbers where they can live for years, according to a study.	Researchers have found evidence of anemone plants, crustaceans, jellyfish and other coastal species growing on rubbish hundreds of miles out to sea in the North Pacific Subtropical Gyre area.					As a result, ocean plastic is creating new communities of life on the high seas "creating opportunities for coastal species' biogeography to greatly expand beyond what we previously thought was possible," said Linsey Haram, of the American Association for the Advancement of Science. This could be seen as an upside of pollution but researchers warn it's unclear how the new residents are interactin…							This could be seen as an upside of pollution but researchers warn it's unclear how the new residents are interacting with existing open water species. The study was published in the journal Nature Communications	Researchers have found evidence of anemone plants, crustaceans, jellyfish and other coastal species growing on rubbish hundreds of miles out to sea in the North Pacific Subtropical Gyre area.
NA	42	42.9	162				"The problems of plastic go beyond ingestion and entanglement," Linsey Haram, lead author of the paper and a former postdoctoral fellow at the Smithsonian Environmental Research Center (SERC), said in a statement.				Coastal plants and animals have found a new way to survive in the open ocean: by colonizing plastic pollution that clumps in ocean current gyres. "It's creating opportunities for the biogeography of coastal species to expand far beyond what we thought possible."																					Editorial Staff MADRID Coastal plants and animals have found a new way to survive in the open ocean: by colonizing plastic pollution that clumps in ocean current gyres.	"The problems of plastic go beyond ingestion and entanglement," Linsey Haram, lead author of the paper and a former postdoctoral fellow at the Smithsonian Environmental Research Center (SERC), said in a statement. "It's creating opportunities for the biogeography of coastal species to expand far beyond what we thought possible."	A new commentary published in Nature Communications reports on coastal species growing in trash hundreds of kilometers offshore in the North Pacific subtropical gyre, more commonly known as the "Great Pacific Garbage Patch." Ocean plastic gyres form when surface currents drive plastic pollution from shorelines to regions where gyre currents trap floating objects, which accumulate over time. The w…				Ocean plastic gyres form when surface currents drive plastic pollution from shorelines to regions where gyre currents trap floating objects, which accumulate over time. The world has at least five plastic-infested gyres or "garbage patches". (EUROPAPRESS)
NA	42	42.20	505					The ability of coastal species to ride on plastic to survive in the open ocean for long periods was highlighted after the 2011 Japanese tsunami.			A new study describes how the rubbish, which covers some 610,000 square miles, has been colonised by animals and plants that would normally be found on the coast. These ocean interlopers include crabs, Asian anemones, marine worms, sea stars and sponges. "This no longer appears to be the case, as suitable habitat now exists in the open ocean and coastal organisms can both survive at sea for years…					It is a vast monument to humanity's carelessness, a layer of plastic debris more than three times the area of France floating in the ocean.																	It is a vast monument to humanity's carelessness, a layer of plastic debris more than three times the area of France floating in the ocean. The latest research involved oceanographers who created computer models that predicted where plastic was most likely to gather in the North Pacific Subtropical Gyre. Using the models as a guide, the researchers were able to collect more than 100 tonnes of pla…	It is a vast monument to humanity's carelessness, a layer of plastic debris more than three times the area of France floating in the ocean. But for a growing number of organisms the "Great Pacific Garbage Patch" is something else - their home. That they are thriving thousands of miles from their usual habitats has upended the long-standing assumption that the open ocean is essentially an impassab…					"The open ocean has not been habitable for coastal organisms until now," Greg Ruiz, of the Smithsonian Environmental Research Centre, said. "Partly because of habitat limitation - there wasn't plastic there in the past - and partly, we thought, because it was a food desert."							The latest research involved oceanographers who created computer models that predicted where plastic was most likely to gather in the North Pacific Subtropical Gyre. Using the models as a guide, the researchers were able to collect more than 100 tonnes of plastics and other debris. This rubbish was passed on to a team of biologists, who found coastal species-including anemones and shrimp-like amp…			"The open ocean has not been habitable for coastal organisms until now," Greg Ruiz, of the Smithsonian Environmental Research Centre, said. "Partly because of habitat limitation - there wasn't plastic there in the past - and partly, we thought, because it was a food desert."
NA	42	42.2	517				Faced with the worsening of this environmental catastrophe in the vicinity of the 'Great Pacific Garbage Patch', Laurent Lebreton, lead author of the study, highlighted the urgency of taking action with the sole purpose of stopping the massive arrival of plastics in the world's seas. In these 'gyres', the waste matter splits and forms microplastics that can be ingested by marine wildlife. This is…	Some 46% of this synthetic material comes from abandoned or lost fishing nets and more than 75% are fragments larger than 5 cm. Containers, bottles, lids, packaging tapes and ropes were also found. The study indicates that 20% of plastic waste accumulated in recent years would be related to the earthquake and tsunami in Japan in 2011.			Plants and animals invade the polluting 'island' of the Pacific Collaborators of the Ocean Voyages Institute (OVI), an NGO of international sailors and conservationists, found plant species, anemones - plant-like invertebrates that normally eat mussels and small fish - marine insects and crabs in almost 90% of the entire 'Great Pacific Garbage Patch'.												Faced with the worsening of this environmental catastrophe in the vicinity of the 'Great Pacific Garbage Patch', Laurent Lebreton, lead author of the study, highlighted the urgency of taking action with the sole purpose of stopping the massive arrival of plastics in the world's seas.		Haram wants to understand how invasive species use plastics as a means of transport. He also found that some coastal animals had moved onto the "island" of residual debris. His study is published as of Dec. 2 in the journal Nature Communications. "More than half of the articles had coastal species," he noted.			Global plastic consumption reached 320 million tons annually, up from 320 million tons in the last decade, according to a 2016 analysis written by Plastics Europe.				Global plastic consumption reached 320 million tons annually, up from 320 million tons in the last decade, according to a 2016 analysis written by Plastics Europe. Unfortunately, only a small percentage ends up incinerated or recycled; the rest soon serves its purpose and is discarded in natural environments such as the Earth's oceans. Research published in the journal Nature, led by the Netherla…	Linsey Haram, of the Smithsonian Environmental Research Center, noted that scientists' main concern is that the vast area of debris has become a habitat.	Research published in the journal Nature, led by the Netherlands-based Ocean Cleanup Foundation, revealed the seriousness of this issue. They warned that the 'Great Pacific Garbage Patch', high concentrations of floating ocean plastic between Hawaii and California, is growing fast to the point of almost exceeding three times the size of France (1.6 million square kilometers). Faced with the worse…		Research published in the journal Nature, led by the Netherlands-based Ocean Cleanup Foundation, revealed the seriousness of this issue. They warned that the 'Great Pacific Garbage Patch', high concentrations of floating ocean plastic between Hawaii and California, is growing fast to the point of almost exceeding three times the size of France (1.6 million square kilometers) Faced with the worsen…								Faced with the worsening of this environmental catastrophe in the vicinity of the 'Great Pacific Garbage Patch', Laurent Lebreton, lead author of the study, highlighted the urgency of taking action with the sole purpose of stopping the massive arrival of plastics in the world's seas.	Research published in the journal Nature, led by the Netherlands-based Ocean Cleanup Foundation, revealed the seriousness of this issue. They warned that the 'Great Pacific Garbage Patch', high concentrations of floating ocean plastic between Hawaii and California, is growing fast to the point of almost exceeding three times the size of France (1.6 million square kilometers).	Research published in the journal Nature, led by the Netherlands-based Ocean Cleanup Foundation, revealed the seriousness of this issue. Faced with the worsening of this environmental catastrophe in the vicinity of the 'Great Pacific Garbage Patch', Laurent Lebreton, lead author of the study, highlighted the urgency of taking action with the sole purpose of stopping the massive arrival of plastic…			Linsey Haram, of the Smithsonian Environmental Research Center, noted that scientists' main concern is that the vast area of debris has become a habitat. "More than half of the articles had coastal species," he noted.
NA	42	42.3	525				Scientists are concerned that plastic is helping to transport invasive species. The study examined plastic items over 5 centimetres in diameter collected from a gyre - an area where circling currents cause debris to build up - in the Pacific.	The researchers, who reported their findings in the journal Nature Communications, began their investigation by analyzing the devastating tsunami.			Many of these creatures are coastal species, which have come to live miles away from their usual habitats in an area that lies between the coast of California (USA) and Hawaii.														"All sorts of things end up there," Haram said. "It's not a plastic island, but there's definitely a lot of plastic trapped there."			A previous study estimated that a total of 25 billion tons of plastic waste will have been generated by 2050.				Scientists have found marine animals that are living in plastic debris in an area of open ocean known as the 'great Pacific garbage patch'.	Scientists have found marine animals that are living in plastic debris in an area of open ocean known as the 'great Pacific garbage patch'.	Scientists have found marine animals that are living in plastic debris in an area of open ocean known as the 'great Pacific garbage patch'. "All sorts of things end up there," Haram said. "It's not a plastic island, but there's definitely a lot of plastic trapped there."			Scientists are concerned that plastic is helping to transport invasive species. Scientists say the finding sheds light on other "unintended consequences" of plastic pollution - a problem that is only expected to grow.							Haram worked with the Ocean Voyages Institute, an NGO that collects plastic pollutants on marine expeditions, and with oceanographers at the University of Hawaii at Manoa.		Researchers collaborated with the Ocean Voyages Institute to collect ocean debris - BBC Brazil News/Ocean Voyages Institute			Lead researcher Linsey Haram, who led the work at the Smithsonian Environmental Research Centre, said: "Plastics are more permanent than a lot of the natural debris you used to see in the open ocean. They are creating a more permanent habitat in this area." "All sorts of things end up there," Haram said. "It's not a plastic island, but there's definitely a lot of plastic trapped there." "We want …
PR	42	42.Ocean plastic is creating new communities of	966				“The issues of plastic go beyond just ingestion and entanglement,” said Linsey Haram, lead author of the article and former postdoctoral fellow at the Smithsonian Environmental Research Center (SERC). “I t’s creating opportunities for coastal species’ biogeography to greatly expand beyond what we previously thought was possible.” Now, scientists have another shift to wrestle with: How these coast…	The authors call these communities neopelagic. “Neo” means new, and “pelagic” refers to the open ocean, as opposed to the coast. Scientists ~rst began suspecting coastal species could use plastic to survive in the open ocean for long periods after the 201 1 Japanese tsunami, when they discovered that nearly 300 species had rafted all the way across the Paci~c on tsunami debris over the course of …			“The issues of plastic go beyond just ingestion and entanglement,” said Linsey Haram, lead author of the article and former postdoctoral fellow at the Smithsonian Environmental Research Center (SERC). “I t’s creating opportunities for coastal species’ biogeography to greatly expand beyond what we previously thought was possible.”																With ~ercer and more frequent storms on the horizon thanks to climate change, the authors expect even more of that plastic will get pushed out to sea.					Coastal plants and animals have found a new way to survive in the open ocean—by colonizing plastic pollution. A new commentary published Dec. 2 in Nature Communications reports coastal species growing on trash hundreds of miles out to sea in the North Paci~c Subtropical Gyre, more commonly known as the “Great Paci~c Garbage Patch.”	“The issues of plastic go beyond just ingestion and entanglement,” said Linsey Haram, lead author of the article and former postdoctoral fellow at the Smithsonian Environmental Research Center (SERC). “I t’s creating opportunities for coastal species’ biogeography to greatly expand beyond what we previously thought was possible.”	Coastal plants and animals have found a new way to survive in the open ocean—by colonizing plastic pollution. A new commentary published Dec. 2 in Nature Communications reports coastal species growing on trash hundreds of miles out to sea in the North Paci~c Subtropical Gyre, more commonly known as the “Great Paci~c Garbage Patch.” Gyres of ocean plastic form when surface currents drive plastic p…						“The issues of plastic go beyond just ingestion and entanglement,” said Linsey Haram, lead author of the article and former postdoctoral fellow at the Smithsonian Environmental Research Center (SERC). “I t’s creating opportunities for coastal species’ biogeography to greatly expand beyond what we previously thought was possible.”				During the ~rst year of the COVID-1 9 pandemic, Ocean Voyages Institute founder Mary Crowley and her team managed to collect a record-breaking 1 03 tons of plastics and other debris from the North Paci~c Subtropical Gyre.		“The issues of plastic go beyond just ingestion and entanglement,” said Linsey Haram, lead author of the article and former postdoctoral fellow at the Smithsonian Environmental Research Center (SERC). “I t’s creating opportunities for coastal species’ biogeography to greatly expand beyond what we previously thought was possible.” The authors call these communities neopelagic. “Neo” means new, and…		“The issues of plastic go beyond just ingestion and entanglement,” said Linsey Haram, lead author of the article and former postdoctoral fellow at the Smithsonian Environmental Research Center (SERC). “I t’s creating opportunities for coastal species’ biogeography to greatly expand beyond what we previously thought was possible.” One advantage of the institute, Haram—now a fellow at the American …
NA	42	42.29	958	1			Researchers are also concerned the debris may help transport invasive species that could disrupt local ecosystems.	A serious threat': Plastics we use every day are leaching hazardous chemicals, report says After the 2011 Japanese tsunami, scientists recorded nearly 300 coastal species crossing the ocean on rafts of debris and arriving on the shores of Hawaii and the U.S. West Coast, according to a 2017 study.			A giant patch of garbage in the Pacific Ocean is now “an immense floating plastic habitat” for marine animals clinging to its plastic debris, researchers have found.				The amount of plastic pollution in the ocean could triple by 2040, according to a 2020 report. If no action is taken to curb plastic pollution, the amount of plastic flowing into the ocean will rise from 11 million tons to 29 million tons in that time, leaving a cumulative 600 million tons in the sea. The U.S. is the worst offender as the world’s leading contributor to plastic waste, according to…	“With the way we are modifying the environment, there are consequences we can't even imagine,” he said. “People should really start to realize that at the scale at which we're introducing pollution, the consequences of that can heavily impact the environment in a way we're unable to think of right now.”												This patch, about twice the size of Texas, contains at least 79,000 metric tons of it, including fishing nets, bottles and tiny plastic fragments called microplastics, according to a 2018 study published in Nature. The amount of plastic pollution in the ocean could triple by 2040, according to a 2020 report.				A giant patch of garbage in the Pacific Ocean is now “an immense floating plastic habitat” for marine animals clinging to its plastic debris, researchers have found.	A giant patch of garbage in the Pacific Ocean is now “an immense floating plastic habitat” for marine animals clinging to its plastic debris, researchers have found.	A giant patch of garbage in the Pacific Ocean is now “an immense floating plastic habitat” for marine animals clinging to its plastic debris, researchers have found. While there are at least five garbage patches in the world, the Great Pacific Garbage Patch, also called the North Pacific Subtropical Gyre, holds the most plastic. This patch, about twice the size of Texas, contains at least 79,000 …			A serious threat': Plastics we use every day are leaching hazardous chemicals, report says After the 2011 Japanese tsunami, scientists recorded nearly 300 coastal species crossing the ocean on rafts of debris and arriving on the shores of Hawaii and the U.S. West Coast, according to a 2017 study. “With the way we are modifying the environment, there are consequences we can't even imagine,” he sai…						The U.S. is the worst offender as the world’s leading contributor to plastic waste, according to a November report that says the country generated about 42 million tons of plastic waste in 2016 – almost twice as much as China.	Just the start: They pulled 63,000 pounds of trash from the Great Pacific Garbage Patch Great Pacific Garbage Patch: Ocean Cleanup device could be fixed and in action by summer But the “garbage patch” is a misnomer, said Luca Centurioni, a co-author of the research published last week. He said much of the plastic is microplastics often too small to see. As ocean currents swirl in a vortex, these …	“With the way we are modifying the environment, there are consequences we can't even imagine,” he said. “People should really start to realize that at the scale at which we're introducing pollution, the consequences of that can heavily impact the environment in a way we're unable to think of right now.”				“A lot of people tend to think it's a floating island,” he said. “It's actually pretty dispersed, but the concentration of plastic debris is higher than in other places. So you may be able to find large pieces but a lot of it is also microplastic.” But sightings of coastal species directly on plastics in the ocean have been rare, according to last week’s study. While scientists knew coastal speci…
NA	42	42.24	290				There is concern coastal hitchhikers could become invasive species. “We want to know if other coastal marine life are on plastics in all of the five main ocean gyres worldwide,” Haram said. Ruiz added, “we’re concerned that coastal organisms from different regions could form colonies and spread disease to other marine life, including fish.”				A group of U.S. and Canadian marine and environmental scientists were amazed to find that some species are thriving on plastic trash floating in the Pacific Ocean. “What has been most eye-opening is that the coastal marine species were not only thriving but reproducing,” Haram said.																					The growing issue of plastic pollution in the world’s oceans is affecting coastal marine life, transporting many species to areas of the open ocean, surprising researchers. A group of U.S. and Canadian marine and environmental scientists were amazed to find that some species are thriving on plastic trash floating in the Pacific Ocean.	The growing issue of plastic pollution in the world’s oceans is affecting coastal marine life, transporting many species to areas of the open ocean, surprising researchers.	“We’ve had a large sailing cargo ship with a crane hoist tons of trash from the patch onto the deck of the vessel, especially the very harmful elements like plastic fishing nets that still catch and kill whales, dolphins and turtles,” Ocean Voyages founder and President Mary Crowley said. The results from the samples provided the researchers with some food for thought. “What has been most eye-ope…			There is concern coastal hitchhikers could become invasive species. “We want to know if other coastal marine life are on plastics in all of the five main ocean gyres worldwide,” Haram said. Ruiz added, “we’re concerned that coastal organisms from different regions could form colonies and spread disease to other marine life, including fish.”							The Ocean Voyages Institute in Sausalito, California, which works to clean up trash in the ocean, provided plastic samples for the research.		A group of U.S. and Canadian marine and environmental scientists were amazed to find that some species are thriving on plastic trash floating in the Pacific Ocean. The Ocean Voyages Institute in Sausalito, California, which works to clean up trash in the ocean, provided plastic samples for the research.			The team discovered oceanic barnacles and crabs living alongside coastal barnacles and anemones. “We expected to find oceanic marine species that have adapted on plastics, but we were absolutely surprised to discover coastal marine species as well,” said Linsey Haram, a research associate with the Smithsonian Environmental Research Center in Edgewater, Maryland. “They may already be out there set…
NA	45	45.15				Because plastic can remain in the ocean for hundreds of years or longer, that means a huge build-up of pollution harming wildlife, contaminating food chains, and affecting the productivity of fisheries and aquaculture.	Because plastic can remain in the ocean for hundreds of years or longer, that means a huge build-up of pollution harming wildlife, contaminating food chains, and affecting the productivity of fisheries and aquaculture.					Doing so could also cut greenhouse gas emissions, reduce costs for businesses and governments, and create more jobs in the sector, the study argued.						Even if governments and companies enact current commitments to curb the problem, from introducing bans and product standards to investing in recycling and restricting trade in plastic waste, it would only reduce the amount going into the oceans by 7%.	Even if governments and companies enact current commitments to curb the problem, from introducing bans and product standards to investing in recycling and restricting trade in plastic waste, it would only reduce the amount going into the oceans by 7%.					But a system-wide change to the way that plastic is handled, using existing interventions, could reduce the amount ending up in the seas by 80% compared with doing nothing, the report said. That involves a significant reduction in plastic production, substituting some plastic with other materials, making more packaging reusable or recyclable, and improving waste collection in middle and low-incom…								THE amount of plastic ending up in the world's oceans could nearly triple by 2040 without major action to curb the problem, researchers have warned.	THE amount of plastic ending up in the world's oceans could nearly triple by 2040 without major action to curb the problem, researchers have warned.	That is the equivalent of 110lb (50kg) of plastic washing into the seas for every metre of shoreline, the team's Breaking The Wave report said.			THE amount of plastic ending up in the world's oceans could nearly triple by 2040 without major action to curb the problem, researchers have warned.								THE amount of plastic ending up in the world's oceans could nearly triple by 2040 without major action to curb the problem, researchers have warned.	THE amount of plastic ending up in the world's oceans could nearly triple by 2040 without major action to curb the problem, researchers have warned. Even if governments and companies enact current commitments to curb the problem, from introducing bans and product standards to investing in recycling and restricting trade in plastic waste, it would only reduce the amount going into the oceans by 7%.
NA	45	45.17			This is problematic because it breaks down into microplastics that are harmful for the environment and our health. Marine life can ingest these plastics and then they can enter the human food chain via fish and other seafood.		This is problematic because it breaks down into microplastics that are harmful for the environment and our health. Marine life can ingest these plastics and then they can enter the human food chain via fish and other seafood.			The study, published in the journal Science, claims that previous estimates of the amount of plastic waste in the ocean are wrong.		The measures could cut down greenhouse gas emissions associated with plastic and could potentially create around 700,000 jobs.						The study has recommended measures that governments and large companies need to take in order to help	The study has recommended measures that governments and large companies need to take in order to help					Recycling more, improving waste collection and using plastic alternatives are all ways we can try and tackle the problem. They include implementing laws against plastic and providing alternatives.								PLASTIC waste in our oceans is expected to triple in the next 20 year because efforts to stem it are barely making an impact. Current and planned efforts to tackle the problem will only be able to reduce the plastic volume by about 7%, according to a new investigation.	The recent research was conducted by scientists and industry experts for The Pew Charitable Trusts and SYSTEMIQ.				PLASTIC waste in our oceans is expected to triple in the next 20 year because efforts to stem it are barely making an impact. If the current trend continues, plastic waste in the ocean could grow by 29million tonnes by 2040.							They think their solutions could cut plastic entering the ocean by around 80%.		The recent research was conducted by scientists and industry experts for The Pew Charitable Trusts and SYSTEMIQ. The study has recommended measures that governments and large companies need to take in order to help.
[truncated: 42 more rows]
[truncated: 10 more columns]
