# Supplementary material for: How frames and narratives in press releases shape newspaper science articles: the case of ocean plastic pollution
Source: Copernicus journal article supplement (doi:10.5194/gc-8-297-2025), 2025-10-15
Supplement: Supplementary file [file gc-8-297-2025-supplement-title-page.pdf › gc-8-297-2025-supplement-title-page.pdf]

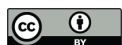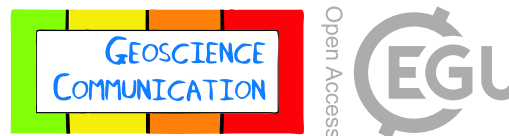

## *Supplement of*

# **How frames and narratives in press releases shape newspaper science articles: the case of ocean plastic pollution**

**Aike Vonk et al.**

*Correspondence to:* Aike Vonk ([a.n.vonk@uu.nl](mailto:a.n.vonk@uu.nl))

- [gc-8-297-2025-supplement-title-page.pdf](#)
- [FlowChart\\_Dataset\\_S3\\_CANVA\\_20240809.pdf](#)
- [Results\\_Dataset\\_Qualitative\\_20250509.xlsx](#)

The copyright of individual parts of the supplement might differ from the article licence.
