# Supplementary figures and images for: How frames and narratives in press releases shape newspaper science articles: the case of ocean plastic pollution
Source: Copernicus journal article supplement (doi:10.5194/gc-8-297-2025), 2025-10-15

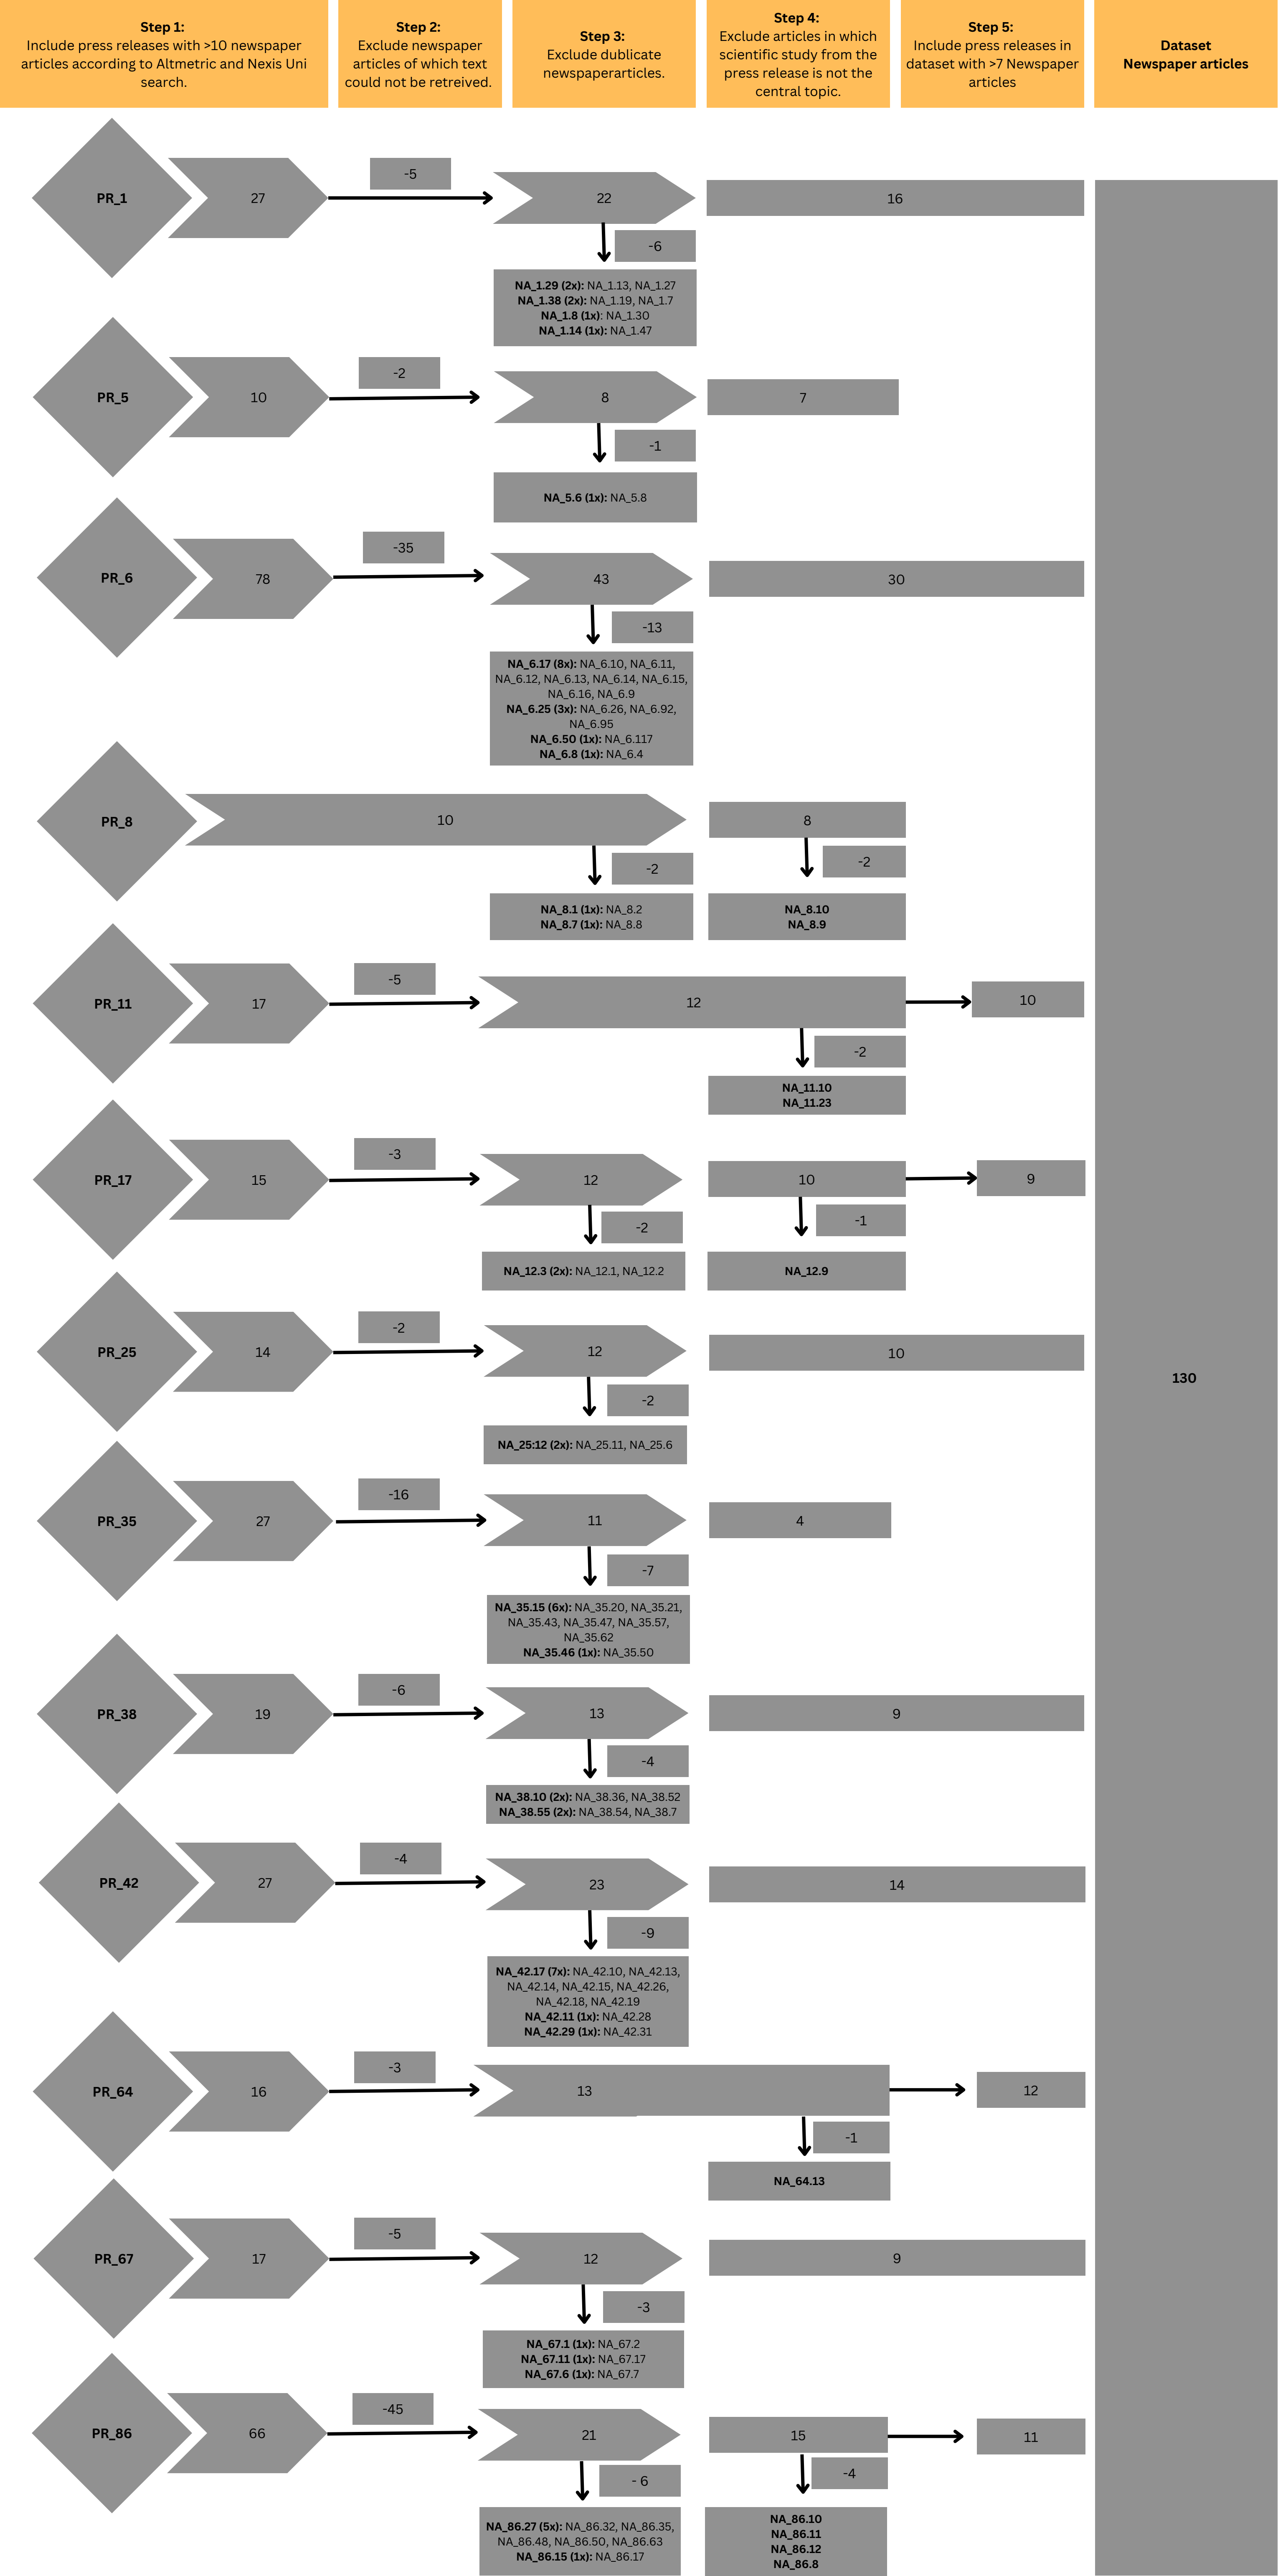

Supplement: Supplementary file 1 [file FlowChart_Dataset_S3_CANVA_20240809.pdf › FlowChart_Dataset_S3_CANVA_20240809.pdf]
